# Supplementary material for: Transient and intermediate carbocations in ruthenium tetroxide oxidation of saturated rings
Source: publisher site journal article supplement (doi:10.3762/bjoc.15.158), 2019-07-11
Supplement: Additional file 1 [file 1860-5397-15-158-S1.pdf]

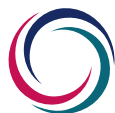

## Supporting Information

for

### **Transient and intermediate carbocations in ruthenium tetroxide oxidation of saturated rings**

Manuel Pedrón, Laura Legnani, Maria-Assunta Chiacchio, Pierluigi Caramella, Tomás Tejero and Pedro Merino

*Beilstein J. Org. Chem.* **2019**, *15*, 1552–1562. [doi:10.3762/bjoc.15.158](https://doi.org/10.3762/bjoc.15.158)

### **Energy data, optimized geometries, full data of ELF analysis and Cartesian coordinates**

## **Table of contents**

|                                                    |     |
|----------------------------------------------------|-----|
| Absolute and relative energies.....                | S2  |
| Optimized geometries of transition structures..... | S5  |
| ELF analyses .....                                 | S7  |
| Cartesian coordinates.....                         | S40 |

## Absolute and relative energies

**Table S1.** Calculated (b3lyp-gd3bj/def2tzvp(cpcm=water//b3lyp-gd3bj//def2svp/cpcm=water) absolute (hartree) and relative (kcal/mol) free energies for the reactants, transition structures and products corresponding to the oxidation of **R1**.

|                 | E(0)        | $\Delta E(0)$ | G           | $\Delta G$ | im. freq |
|-----------------|-------------|---------------|-------------|------------|----------|
| <b>RuO4</b>     | -395.903443 |               | -395.930584 |            |          |
| <b>R1</b>       | -196.510159 |               | -196.537248 |            |          |
| <b>Reagents</b> | -592.413602 | 0.0           | -592.467832 | 0.0        |          |
| <b>EP1</b>      | -592.417526 | -2.5          | -592.458056 | -2.6       |          |
| <b>TS1</b>      | -592.390308 | 14.6          | -592.427942 | 14.6       | -1281.0  |
| <b>P1</b>       | -592.478365 | -40.6         | -592.516452 | -40.6      |          |

**Table S2.** Calculated (b3lyp-gd3bj/def2tzvp(cpcm=water//b3lyp-gd3bj//def2svp/cpcm=water) absolute (hartree) and relative (kcal/mol) free energies for the reactants, transition structures and products corresponding to the oxidation of **R2**.

|                 | E(0)        | $\Delta E(0)$ | G           | $\Delta G$ | im. freq |
|-----------------|-------------|---------------|-------------|------------|----------|
| <b>RuO4</b>     | -395.903443 |               | -395.930584 |            |          |
| <b>R2</b>       | -232.445780 |               | -232.473781 |            |          |
| <b>Reagents</b> | -628.349224 | 0.0           | -628.404366 | 0.0        |          |
| <b>EP2</b>      | -628.352740 | -2.2          | -628.391449 | -2.4       |          |
| <b>TS2</b>      | -628.338725 | 6.6           | -628.379775 | 6.0        | -1232.9  |
| <b>P2</b>       | -628.427989 | -49.4         | -628.464953 | -49.7      |          |

**Table S3.** Calculated (b3lyp-gd3bj/def2tzvp(cpcm=water//b3lyp-gd3bj//def2svp/cpcm=water) absolute (hartree) and relative (kcal/mol) free energies for the reactants, transition structures and products corresponding to the oxidation of

|                 | E(0)        | $\Delta E(0)$ | G           | $\Delta G$ | im. freq |
|-----------------|-------------|---------------|-------------|------------|----------|
| <b>RuO4</b>     | -395.903443 |               | -395.930584 |            |          |
| <b>R3</b>       | -555.436335 |               | -555.464960 |            |          |
| <b>Reagents</b> | -951.339779 | 0.0           | -951.395545 | 0.0        |          |
| <b>EP3</b>      | -951.353117 | -8.4          | -951.391626 | -8.5       |          |
| <b>TS3</b>      | -951.327509 | 7.7           | -951.366306 | 7.5        | -1281.7  |
| <b>P3</b>       | -951.403375 | -39.9         | -951.440993 | -40.1      |          |

**Table S4.** Calculated (b3lyp-gd3bj/def2tzvp(cpcm=water//b3lyp-gd3bj//def2svp/cpcm=water) absolute (hartree) and relative (kcal/mol) free energies for the reactants, transition structures and products corresponding to the oxidation of **R4**.

|                 | E(0)        | $\Delta E(0)$ | G           | $\Delta G$ | im. freq |
|-----------------|-------------|---------------|-------------|------------|----------|
| <b>RuO4</b>     | -395.903443 |               | -395.930584 |            |          |
| <b>R4</b>       | -251.858668 |               | -251.888674 |            |          |
| <b>Reagents</b> | -647.762111 | 0.0           | -647.819258 | 0.0        |          |
| <b>EP4</b>      | -647.770427 | -5.2          | -647.810129 | -5.3       |          |
| <b>TS4a</b>     | -647.769335 | -4.5          | -647.809217 | -4.8       | -690.3   |
| <b>TS4b</b>     | -647.767200 | -3.2          | -647.806114 | -3.5       | -681.8   |
| <b>IN4a</b>     | -647.825706 | -39.9         | -647.866491 | -39.8      |          |
| <b>P4a</b>      | -647.835231 | -45.9         | -647.874327 | -45.9      |          |
| <b>P4b</b>      | -647.825280 | -39.6         | -647.864819 | -39.9      |          |

**Table S5.** Calculated (b3lyp-gd3bj/def2tzvp(cpcm=water//b3lyp-gd3bj//def2svp/cpcm=water) absolute (hartree) and relative (kcal/mol) free energies for the reactants, transition structures and products corresponding to the oxidation of **R5**.

|                 | E(0)        | $\Delta E(0)$ | G           | $\Delta G$ | im. freq |
|-----------------|-------------|---------------|-------------|------------|----------|
| <b>RuO4</b>     | -395.903443 |               | -395.930584 |            |          |
| <b>R5</b>       | -597.481249 |               | -597.522439 |            |          |
| <b>Reagents</b> | -993.384693 | 0.0           | -993.453024 | 0.0        |          |
| <b>EP5</b>      | -993.395516 | -6.8          | -993.447428 | -7.0       |          |
| <b>TS5a</b>     | -993.394954 | -6.4          | -993.444091 | -6.5       | -589.9   |
| <b>TS5b</b>     | -993.394416 | -6.1          | -993.443282 | -6.2       | -412.1   |
| <b>IN5a</b>     | -993.451744 | -42.1         | -993.501946 | -41.8      |          |
| <b>IN5b</b>     | -993.453456 | -43.1         | -993.504582 | -43.1      |          |
| <b>P5a</b>      | -993.462561 | -48.9         | -993.512085 | -48.8      |          |
| <b>P5b</b>      | -993.455851 | -44.7         | -993.504403 | -44.6      |          |

**Table S6.** Calculated (b3lyp-gd3bj/def2tzvp(pcm=MeCN//b3lyp-gd3bj//def2svp/pcm=MeCN) absolute (hartree) and relative (kcal/mol) free energies for the reactants, transition structures and products corresponding to the oxidation of **R1**.

|                 | E(0)         | $\Delta E(0)$ | G            | $\Delta G$ | im. freq |
|-----------------|--------------|---------------|--------------|------------|----------|
| <b>RuO4</b>     | -395.9028375 |               | -395.9299785 |            |          |
| <b>R1</b>       | -196.5101356 |               | -196.5372236 |            |          |
| <b>Reagents</b> | -592.4129732 | 0.0           | -592.4672022 | 0.0        |          |
| <b>EP1</b>      | -592.4169686 | -2.5          | -592.4574856 | -2.6       |          |
| <b>TS1</b>      | -592.3896939 | 14.6          | -592.4273289 | 14.6       | -1280.9  |
| <b>P1</b>       | -592.4775578 | -40.5         | -592.5156378 | -40.5      |          |

**Table S7.** Calculated (b3lyp-gd3bj/def2tzvp(pcm=MeCN//b3lyp-gd3bj//def2svp/pcm=MeCN) absolute (hartree) and relative (kcal/mol) free energies for the reactants, transition structures and products corresponding to the oxidation of **R2**.

|                 | E(0)         | $\Delta E(0)$ | G            | $\Delta G$ | im. freq |
|-----------------|--------------|---------------|--------------|------------|----------|
| <b>RuO4</b>     | -395.9028375 |               | -395.9299785 |            |          |
| <b>R2</b>       | -232.4456539 |               | -232.4736479 |            |          |
| <b>Reagents</b> | -628.3484914 | 0.0           | -628.4036264 | 0.0        |          |
| <b>EP2</b>      | -628.3519002 | -2.1          | -628.3904222 | -2.3       |          |
| <b>TS2</b>      | -628.3372328 | 7.1           | -628.3747938 | 6.8        | -965.6   |
| <b>P2</b>       | -628.4271490 | -49.4         | -628.4640210 | -49.6      |          |

**Table S8.** Calculated (b3lyp-gd3bj/def2tzvp(pcm=MeCN//b3lyp-gd3bj//def2svp/pcm=MeCN) absolute (hartree) and relative (kcal/mol) free energies for the reactants, transition structures and products corresponding to the oxidation of **R3**.

|                 | E(0)         | $\Delta E(0)$ | G            | $\Delta G$ | im. freq |
|-----------------|--------------|---------------|--------------|------------|----------|
| <b>RuO4</b>     | -395.9028375 |               | -395.9299785 |            |          |
| <b>R3</b>       | -555.4362091 |               | -555.4648351 |            |          |
| <b>Reagents</b> | -951.3390466 | 0.0           | -951.3948136 | 0.0        |          |
| <b>EP3</b>      | -951.3523720 | -8.4          | -951.3908030 | -8.4       |          |
| <b>TS3</b>      | -951.3268517 | 7.7           | -951.3655747 | 7.5        | -1278.6  |
| <b>P3</b>       | -951.4025749 | -39.9         | -951.4401499 | -40.1      |          |

**Table S9.** Calculated (b3lyp-gd3bj/def2tzvp(pcm=MeCN)//b3lyp-gd3bj//def2svp/pcm=MeCN) absolute (hartree) and relative (kcal/mol) free energies for the reactants, transition structures and products corresponding to the oxidation of **R4**.

|                 | E(0)         | $\Delta E(0)$ | G            | $\Delta G$ | im. freq |
|-----------------|--------------|---------------|--------------|------------|----------|
| <b>RuO4</b>     | -395.9028375 |               | -395.9299785 |            |          |
| <b>R4</b>       | -251.8586002 |               | -251.8886272 |            |          |
| <b>Reagents</b> | -647.7614377 | 0.0           | -647.8186057 | 0.0        |          |
| <b>EP4</b>      | -647.7697292 | -5.2          | -647.8093252 | -5.2       |          |
| <b>TS4a</b>     | -647.7686556 | -4.5          | -647.8085136 | -4.8       | -699.3   |
| <b>TS4b</b>     | -647.7664943 | -3.2          | -647.8053883 | -3.5       | -690.2   |
| <b>IN4a</b>     | -647.8244123 | -39.5         | -647.8651843 | -39.4      |          |
| <b>P4a</b>      | -647.8344311 | -45.8         | -647.8735811 | -45.8      |          |
| <b>P4b</b>      | -647.8245028 | -39.6         | -647.8639838 | -39.8      |          |

**Table S10.** Calculated (b3lyp-gd3bj/def2tzvp(pcm=MeCN)//b3lyp-gd3bj//def2svp/pcm=MeCN) absolute (hartree) and relative (kcal/mol) free energies for the reactants, transition structures and products corresponding to the oxidation of **R5**.

|                 | E(0)         | $\Delta E(0)$ | G            | $\Delta G$ | im. freq |
|-----------------|--------------|---------------|--------------|------------|----------|
| <b>RuO4</b>     | -395.9028375 |               | -395.9299785 |            |          |
| <b>R5</b>       | -597.4810172 |               | -597.5222102 |            |          |
| <b>Reagents</b> | -993.3838547 | 0.0           | -993.4521887 | 0.0        |          |
| <b>EP5</b>      | -993.3947838 | -6.9          | -993.4457558 | -7.0       |          |
| <b>TS5a</b>     | -993.3941935 | -6.5          | -993.4433775 | -6.6       | -599.1   |
| <b>TS5b</b>     | -993.3937191 | -6.2          | -993.4425561 | -6.3       | -422.8   |
| <b>IN5a</b>     | -993.4504519 | -41.8         | -993.5006839 | -41.6      |          |
| <b>IN5b</b>     | -993.4515969 | -42.5         | -993.5026259 | -42.4      |          |
| <b>P5a</b>      | -993.4616006 | -48.8         | -993.5111336 | -48.8      |          |
| <b>P5b</b>      | -993.4530474 | -43.4         | -993.5019974 | -43.4      |          |

## Optimized geometries of transition structures and intermediates

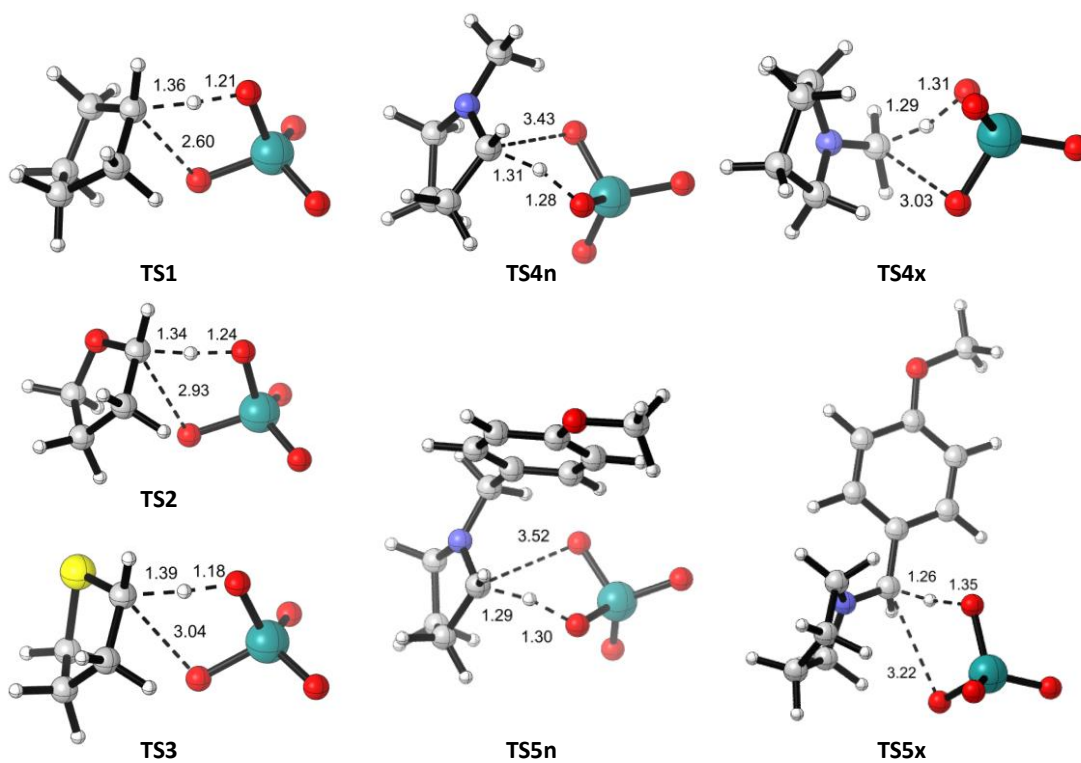

**Figure S1.** Optimized geometries (b3lyp-gd3bj/def2svp/gas) of transition structures corresponding to the oxidation of R1-R5.

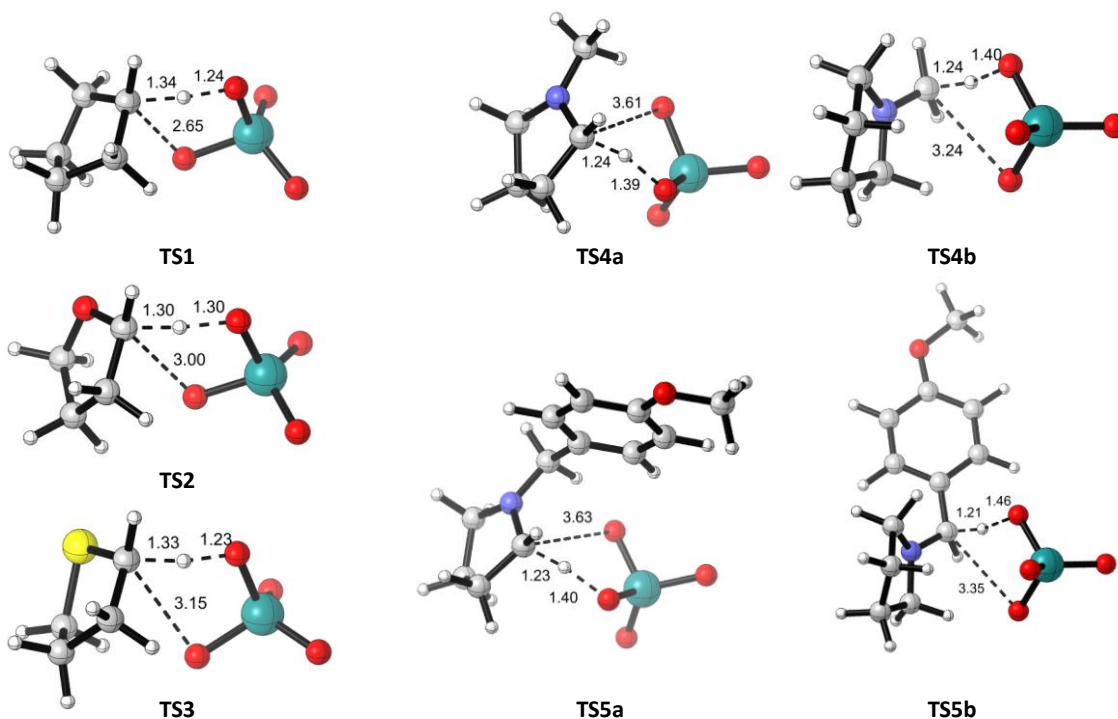

**Figure S2.** Optimized geometries (b3lyp-gd3bj/def2svp/cpcm=water) of transition structures corresponding to the oxidation of R1-R5.

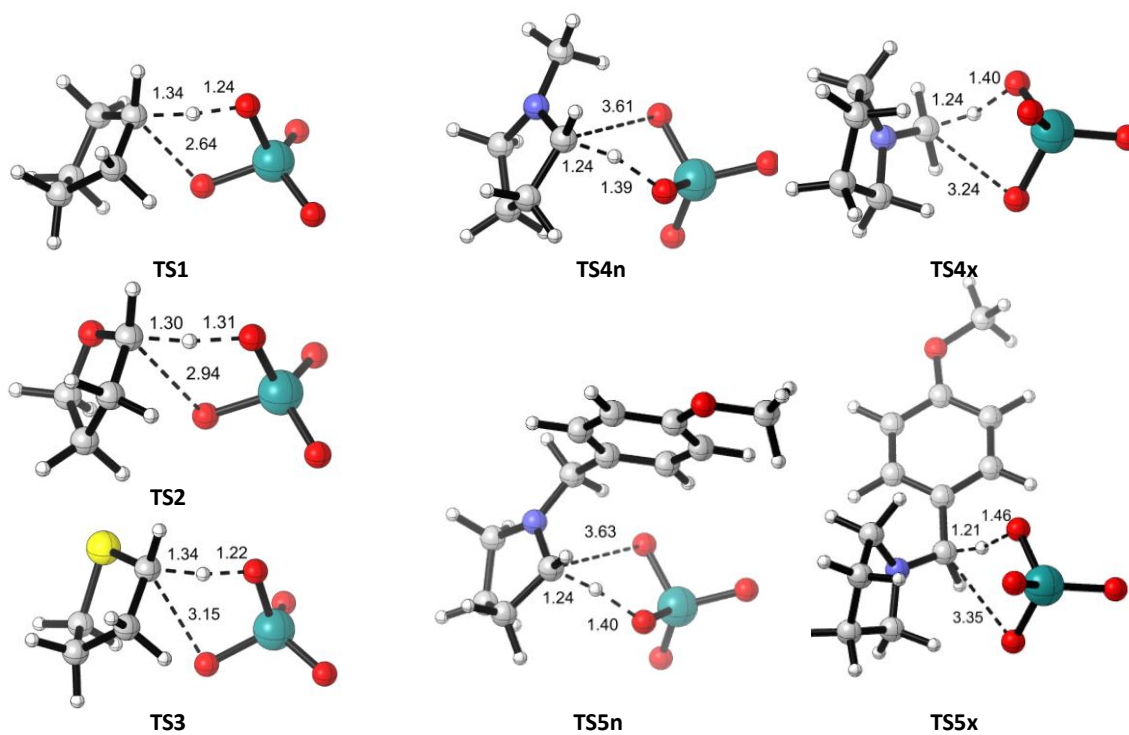

**Figure S3.** Optimized geometries (b3lyp-gd3bj/def2svp/pcm=MeCN) of transition structures corresponding to the oxidation of **R1-R5**.

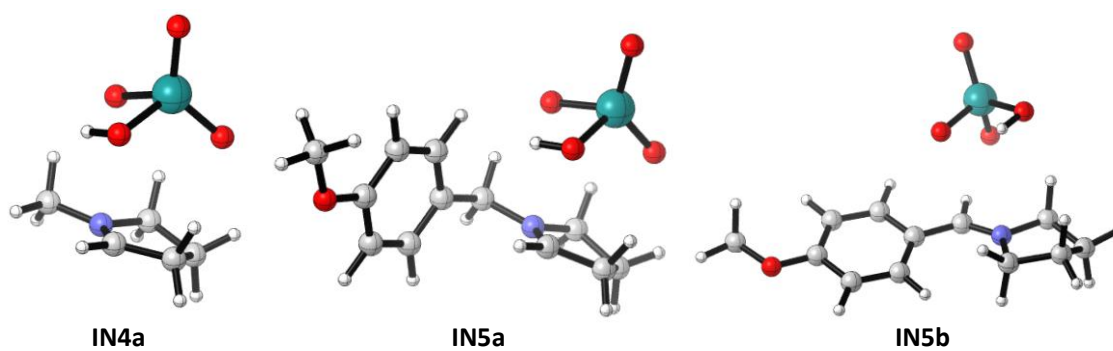

**Figure S4.** Optimized geometries (b3lyp-gd3bj/def2svp/cpcm=water) of intermediates **IN4a**, **IN5a** and **IN5b**.

## ELF analyses

### *ELF analysis for oxidation of cyclopentane R1*

In the oxidation of cyclopentane the H-transfer essentially takes place at the transition state (point 77, 29% of IRC). Breaking of the C1–H bond is concomitant with a decrease of population of O3 (points 77–80), immediately followed by H-transfer (point 78) and O3–H bond formation (point 81) assessed by the appearance of a disynaptic basin V(O3,H). However, some residual density remains at C1 as it keeps a monosynaptic basin V(C1). Indeed, it is only at point 128 (48% of IRC) when V(C1) merges with monosynaptic basin from oxygen V(O6) to disynaptic basin V(C1,O6), indicating the formation of the second C–O bond. The gap between H-transfer and C1–O6 bond formation (from point 81 to point 127) is compatible with the existence of a transient carbocation at C1 as suggested by the slight increase of the electron population of disynaptic basins V(C1,C2) and V(C1,C8). Nevertheless, the continued presence of basin V(C1) evidences the elusive character of such carbocation and the reaction might also be considered just an asynchronous concerted process with a clear charge development during the formation of O3–H and C1–CO6 bonds that takes place in two separated events.

**Table S11.** ELF basin populations for the oxidation of **R1**

|   | V1(O3) | V2(O3) | V3(O3) | V1(O4) | V2(O4) | V1(O5) | V2(O5) | V1(O6) | V2(O6) | V3(O6) | V(C1,C2) | V(C1,C8) | V(C8,C10) | V(C9,C10) | V(C2,C9) | V(C1,H) | V(O3,H) | V(C1,O6) | V(C1) | V(H) | Ru    |
|---|--------|--------|--------|--------|--------|--------|--------|--------|--------|--------|----------|----------|-----------|-----------|----------|---------|---------|----------|-------|------|-------|
| 1 | 6.84   | -      | -      | 6.85   | -      | 6.87   | -      | 6.89   | -      | -      | 1.81     | 1.81     | 1.81      | 1.81      | 1.81     | 2.05    | -       | -        | -     | -    | 12.11 |
| 2 | 6.84   | -      | -      | 6.84   | -      | 6.87   | -      | 6.88   | -      | -      | 1.81     | 1.81     | 1.81      | 1.81      | 1.81     | 2.05    | -       | -        | -     | -    | 12.11 |
| 3 | 6.83   | -      | -      | 6.85   | -      | 6.86   | -      | 6.89   | -      | -      | 1.81     | 1.81     | 1.81      | 1.81      | 1.81     | 2.05    | -       | -        | -     | -    | 12.11 |
| 4 | 6.84   | -      | -      | 6.85   | -      | 6.86   | -      | 6.88   | -      | -      | 1.81     | 1.81     | 1.81      | 1.81      | 1.81     | 2.05    | -       | -        | -     | -    | 12.11 |
| 5 | 6.83   | -      | -      | 6.84   | -      | 6.86   | -      | 6.88   | -      | -      | 1.81     | 1.81     | 1.81      | 1.81      | 1.81     | 2.05    | -       | -        | -     | -    | 12.11 |
| 6 | 6.83   | -      | -      | 6.85   | -      | 6.86   | -      | 6.88   | -      | -      | 1.81     | 1.81     | 1.81      | 1.81      | 1.81     | 2.05    | -       | -        | -     | -    | 12.11 |
| 7 | 6.83   | -      | -      | 6.85   | -      | 6.86   | -      | 6.88   | -      | -      | 1.80     | 1.81     | 1.81      | 1.81      | 1.81     | 2.05    | -       | -        | -     | -    | 12.11 |
| 8 | 6.82   | -      | -      | 6.85   | -      | 6.86   | -      | 6.88   | -      | -      | 1.81     | 1.80     | 1.81      | 1.81      | 1.81     | 2.06    | -       | -        | -     | -    | 12.11 |



|    |      |   |   |      |   |      |   |      |   |   |      |      |      |      |      |      |   |   |   |   |       |
|----|------|---|---|------|---|------|---|------|---|---|------|------|------|------|------|------|---|---|---|---|-------|
| 9  | 6.81 | - | - | 6.86 | - | 6.87 | - | 6.88 | - | - | 1.81 | 1.80 | 1.80 | 1.81 | 1.81 | 2.06 | - | - | - | - | 12.10 |
| 10 | 6.81 | - | - | 6.85 | - | 6.87 | - | 6.88 | - | - | 1.81 | 1.81 | 1.81 | 1.81 | 1.81 | 2.05 | - | - | - | - | 12.10 |
| 11 | 6.82 | - | - | 6.86 | - | 6.87 | - | 6.88 | - | - | 1.81 | 1.81 | 1.81 | 1.81 | 1.81 | 2.05 | - | - | - | - | 12.11 |
| 12 | 6.83 | - | - | 6.86 | - | 6.86 | - | 6.88 | - | - | 1.81 | 1.81 | 1.81 | 1.81 | 1.81 | 2.05 | - | - | - | - | 12.11 |
| 13 | 6.84 | - | - | 6.85 | - | 6.85 | - | 6.88 | - | - | 1.81 | 1.81 | 1.81 | 1.81 | 1.81 | 2.05 | - | - | - | - | 12.10 |
| 14 | 6.84 | - | - | 6.84 | - | 6.86 | - | 6.88 | - | - | 1.81 | 1.81 | 1.80 | 1.81 | 1.81 | 2.05 | - | - | - | - | 12.11 |
| 15 | 6.84 | - | - | 6.85 | - | 6.86 | - | 6.88 | - | - | 1.81 | 1.81 | 1.81 | 1.81 | 1.81 | 2.05 | - | - | - | - | 12.11 |
| 16 | 6.83 | - | - | 6.85 | - | 6.87 | - | 6.88 | - | - | 1.81 | 1.81 | 1.81 | 1.81 | 1.81 | 2.05 | - | - | - | - | 12.11 |
| 17 | 6.83 | - | - | 6.86 | - | 6.86 | - | 6.88 | - | - | 1.81 | 1.81 | 1.81 | 1.81 | 1.81 | 2.05 | - | - | - | - | 12.11 |
| 18 | 6.83 | - | - | 6.84 | - | 6.87 | - | 6.88 | - | - | 1.81 | 1.81 | 1.81 | 1.81 | 1.81 | 2.05 | - | - | - | - | 12.11 |
| 19 | 6.83 | - | - | 6.83 | - | 6.87 | - | 6.88 | - | - | 1.81 | 1.81 | 1.81 | 1.81 | 1.81 | 2.05 | - | - | - | - | 12.11 |
| 20 | 6.84 | - | - | 6.83 | - | 6.87 | - | 6.88 | - | - | 1.81 | 1.81 | 1.81 | 1.81 | 1.81 | 2.05 | - | - | - | - | 12.11 |
| 21 | 6.84 | - | - | 6.83 | - | 6.87 | - | 6.87 | - | - | 1.81 | 1.81 | 1.81 | 1.81 | 1.81 | 2.05 | - | - | - | - | 12.11 |
| 22 | 6.84 | - | - | 6.85 | - | 6.87 | - | 6.88 | - | - | 1.81 | 1.81 | 1.81 | 1.81 | 1.81 | 2.05 | - | - | - | - | 12.11 |
| 23 | 6.84 | - | - | 6.85 | - | 6.87 | - | 6.87 | - | - | 1.81 | 1.81 | 1.81 | 1.81 | 1.81 | 2.05 | - | - | - | - | 12.11 |
| 24 | 6.84 | - | - | 6.86 | - | 6.87 | - | 6.89 | - | - | 1.81 | 1.81 | 1.81 | 1.81 | 1.81 | 2.05 | - | - | - | - | 12.11 |
| 25 | 6.84 | - | - | 6.86 | - | 6.86 | - | 6.89 | - | - | 1.81 | 1.81 | 1.81 | 1.81 | 1.81 | 2.05 | - | - | - | - | 12.11 |
| 26 | 6.84 | - | - | 6.86 | - | 6.86 | - | 6.88 | - | - | 1.81 | 1.81 | 1.81 | 1.81 | 1.81 | 2.05 | - | - | - | - | 12.11 |
| 27 | 6.84 | - | - | 6.86 | - | 6.86 | - | 6.88 | - | - | 1.81 | 1.81 | 1.81 | 1.81 | 1.81 | 2.05 | - | - | - | - | 12.11 |
| 28 | 6.84 | - | - | 6.85 | - | 6.87 | - | 6.88 | - | - | 1.81 | 1.81 | 1.81 | 1.81 | 1.81 | 2.05 | - | - | - | - | 12.11 |
| 29 | 6.84 | - | - | 6.85 | - | 6.87 | - | 6.88 | - | - | 1.81 | 1.81 | 1.81 | 1.81 | 1.81 | 2.05 | - | - | - | - | 12.11 |
| 30 | 6.84 | - | - | 6.85 | - | 6.86 | - | 6.88 | - | - | 1.81 | 1.81 | 1.81 | 1.81 | 1.81 | 2.04 | - | - | - | - | 12.11 |
| 31 | 6.84 | - | - | 6.86 | - | 6.87 | - | 6.88 | - | - | 1.81 | 1.81 | 1.81 | 1.81 | 1.81 | 2.04 | - | - | - | - | 12.11 |
| 32 | 6.83 | - | - | 6.85 | - | 6.87 | - | 6.88 | - | - | 1.81 | 1.81 | 1.81 | 1.81 | 1.81 | 2.04 | - | - | - | - | 12.11 |
| 33 | 6.83 | - | - | 6.86 | - | 6.87 | - | 6.89 | - | - | 1.81 | 1.81 | 1.81 | 1.81 | 1.80 | 2.04 | - | - | - | - | 12.11 |
| 34 | 6.84 | - | - | 6.86 | - | 6.88 | - | 6.88 | - | - | 1.81 | 1.81 | 1.81 | 1.81 | 1.81 | 2.04 | - | - | - | - | 12.11 |
| 35 | 6.84 | - | - | 6.86 | - | 6.87 | - | 6.88 | - | - | 1.82 | 1.81 | 1.81 | 1.81 | 1.81 | 2.04 | - | - | - | - | 12.11 |
| 36 | 6.82 | - | - | 6.86 | - | 6.86 | - | 6.88 | - | - | 1.81 | 1.81 | 1.81 | 1.81 | 1.81 | 2.04 | - | - | - | - | 12.11 |
| 37 | 6.83 | - | - | 6.86 | - | 6.87 | - | 6.88 | - | - | 1.82 | 1.81 | 1.81 | 1.81 | 1.81 | 2.04 | - | - | - | - | 12.11 |
| 38 | 6.83 | - | - | 6.87 | - | 6.87 | - | 6.88 | - | - | 1.81 | 1.81 | 1.81 | 1.81 | 1.81 | 2.04 | - | - | - | - | 12.11 |
| 39 | 6.83 | - | - | 6.87 | - | 6.87 | - | 6.88 | - | - | 1.81 | 1.81 | 1.81 | 1.81 | 1.81 | 2.03 | - | - | - | - | 12.11 |
| 40 | 6.83 | - | - | 6.86 | - | 6.87 | - | 6.88 | - | - | 1.81 | 1.82 | 1.81 | 1.81 | 1.81 | 2.03 | - | - | - | - | 12.12 |
| 41 | 6.83 | - | - | 6.86 | - | 6.87 | - | 6.87 | - | - | 1.81 | 1.82 | 1.81 | 1.81 | 1.81 | 2.03 | - | - | - | - | 12.12 |
| 42 | 6.82 | - | - | 6.87 | - | 6.87 | - | 6.87 | - | - | 1.82 | 1.82 | 1.81 | 1.81 | 1.80 | 2.03 | - | - | - | - | 12.12 |
| 43 | 6.83 | - | - | 6.87 | - | 6.88 | - | 6.87 | - | - | 1.81 | 1.82 | 1.81 | 1.81 | 1.81 | 2.02 | - | - | - | - | 12.12 |

|    |      |      |      |      |      |      |      |      |      |   |      |      |      |      |      |      |   |   |      |      |       |
|----|------|------|------|------|------|------|------|------|------|---|------|------|------|------|------|------|---|---|------|------|-------|
| 44 | 6.83 | -    | -    | 6.88 | -    | 6.88 | -    | 6.86 | -    | - | 1.81 | 1.82 | 1.81 | 1.81 | 1.81 | 2.02 | - | - | -    | -    | 12.12 |
| 45 | 6.83 | -    | -    | 6.88 | -    | 6.87 | -    | 6.85 | -    | - | 1.82 | 1.82 | 1.81 | 1.81 | 1.80 | 2.02 | - | - | -    | -    | 12.13 |
| 46 | 6.82 | -    | -    | 6.88 | -    | 6.87 | -    | 6.86 | -    | - | 1.81 | 1.82 | 1.81 | 1.81 | 1.80 | 2.02 | - | - | -    | -    | 12.13 |
| 47 | 6.82 | -    | -    | 6.87 | -    | 6.88 | -    | 6.86 | -    | - | 1.82 | 1.82 | 1.81 | 1.81 | 1.80 | 2.01 | - | - | -    | -    | 12.13 |
| 48 | 6.82 | -    | -    | 6.88 | -    | 6.88 | -    | 6.87 | -    | - | 1.82 | 1.82 | 1.81 | 1.81 | 1.80 | 2.01 | - | - | -    | -    | 12.13 |
| 49 | 6.82 | -    | -    | 6.88 | -    | 6.89 | -    | 6.87 | -    | - | 1.82 | 1.82 | 1.81 | 1.81 | 1.80 | 2.01 | - | - | -    | -    | 12.13 |
| 50 | 6.81 | -    | -    | 6.88 | -    | 6.88 | -    | 6.87 | -    | - | 1.82 | 1.82 | 1.81 | 1.81 | 1.81 | 2.00 | - | - | -    | -    | 12.13 |
| 51 | 6.82 | -    | -    | 6.88 | -    | 6.88 | -    | 6.87 | -    | - | 1.82 | 1.83 | 1.81 | 1.81 | 1.81 | 2.00 | - | - | -    | -    | 12.14 |
| 52 | 6.81 | -    | -    | 6.88 | -    | 6.88 | -    | 6.87 | -    | - | 1.82 | 1.83 | 1.81 | 1.81 | 1.81 | 1.99 | - | - | -    | -    | 12.14 |
| 53 | 6.81 | -    | -    | 6.88 | -    | 6.89 | -    | 6.88 | -    | - | 1.82 | 1.83 | 1.81 | 1.81 | 1.81 | 1.99 | - | - | -    | -    | 12.14 |
| 54 | 6.81 | -    | -    | 6.89 | -    | 6.88 | -    | 6.88 | -    | - | 1.82 | 1.83 | 1.81 | 1.81 | 1.80 | 1.98 | - | - | -    | -    | 12.15 |
| 55 | 6.82 | -    | -    | 6.89 | -    | 6.89 | -    | 6.88 | -    | - | 1.83 | 1.83 | 1.81 | 1.81 | 1.80 | 1.98 | - | - | -    | -    | 12.15 |
| 56 | 3.60 | 3.21 | -    | 6.88 | -    | 3.03 | 3.86 | 6.87 | -    | - | 1.83 | 1.83 | 1.81 | 1.81 | 1.80 | 1.97 | - | - | -    | -    | 12.15 |
| 57 | 3.55 | 3.27 | -    | 2.92 | 3.96 | 3.19 | 3.70 | 6.87 | -    | - | 1.83 | 1.83 | 1.81 | 1.81 | 1.80 | 1.96 | - | - | -    | -    | 12.16 |
| 58 | 3.52 | 3.30 | -    | 3.09 | 3.80 | 3.30 | 3.60 | 6.87 | -    | - | 1.83 | 1.83 | 1.81 | 1.81 | 1.80 | 1.95 | - | - | -    | -    | 12.16 |
| 59 | 3.48 | 3.33 | -    | 3.21 | 3.68 | 3.36 | 3.53 | 6.86 | -    | - | 1.83 | 1.84 | 1.81 | 1.81 | 1.80 | 1.94 | - | - | -    | -    | 12.17 |
| 60 | 3.48 | 3.34 | -    | 3.29 | 3.59 | 3.36 | 3.52 | 6.86 | -    | - | 1.83 | 1.83 | 1.81 | 1.81 | 1.80 | 1.94 | - | - | -    | -    | 12.17 |
| 61 | 3.45 | 3.36 | -    | 3.37 | 3.51 | 3.46 | 3.43 | 6.85 | -    | - | 1.83 | 1.84 | 1.81 | 1.81 | 1.80 | 1.93 | - | - | -    | -    | 12.18 |
| 62 | 3.46 | 3.37 | -    | 3.41 | 3.47 | 3.50 | 3.40 | 6.86 | -    | - | 1.84 | 1.84 | 1.81 | 1.81 | 1.80 | 1.92 | - | - | -    | -    | 12.18 |
| 63 | 3.45 | 3.38 | -    | 3.45 | 3.43 | 3.52 | 3.38 | 6.85 | -    | - | 1.84 | 1.84 | 1.81 | 1.81 | 1.80 | 1.91 | - | - | -    | -    | 12.18 |
| 64 | 3.45 | 3.38 | -    | 3.49 | 3.39 | 3.55 | 3.35 | 6.86 | -    | - | 1.84 | 1.84 | 1.81 | 1.81 | 1.80 | 1.90 | - | - | -    | -    | 12.19 |
| 65 | 3.45 | 3.38 | -    | 3.52 | 3.36 | 3.57 | 3.33 | 6.86 | -    | - | 1.84 | 1.84 | 1.81 | 1.81 | 1.80 | 1.89 | - | - | -    | -    | 12.19 |
| 66 | 3.44 | 3.39 | -    | 3.56 | 3.33 | 3.59 | 3.31 | 6.86 | -    | - | 1.84 | 1.85 | 1.81 | 1.81 | 1.80 | 1.88 | - | - | -    | -    | 12.20 |
| 67 | 3.44 | 3.39 | -    | 3.58 | 3.31 | 3.60 | 3.30 | 6.86 | -    | - | 1.85 | 1.85 | 1.81 | 1.81 | 1.80 | 1.87 | - | - | -    | -    | 12.21 |
| 68 | 3.44 | 3.40 | -    | 3.61 | 3.28 | 3.63 | 3.27 | 6.86 | -    | - | 1.85 | 1.85 | 1.81 | 1.81 | 1.80 | 1.85 | - | - | -    | -    | 12.22 |
| 69 | 3.43 | 3.40 | -    | 3.64 | 3.26 | 3.66 | 3.25 | 6.86 | -    | - | 1.85 | 1.86 | 1.81 | 1.81 | 1.80 | 1.83 | - | - | -    | -    | 12.23 |
| 70 | 3.43 | 3.40 | -    | 3.67 | 3.23 | 3.69 | 3.22 | 6.87 | -    | - | 1.86 | 1.86 | 1.81 | 1.81 | 1.80 | 1.81 | - | - | -    | -    | 12.24 |
| 71 | 3.43 | 3.40 | -    | 3.70 | 3.20 | 3.72 | 3.18 | 6.85 | -    | - | 1.87 | 1.87 | 1.82 | 1.81 | 1.80 | 1.79 | - | - | -    | -    | 12.25 |
| 72 | 3.43 | 3.40 | -    | 3.74 | 3.17 | 3.76 | 3.15 | 6.85 | -    | - | 1.87 | 1.87 | 1.81 | 1.81 | 1.80 | 1.76 | - | - | -    | -    | 12.27 |
| 73 | 3.43 | 3.41 | -    | 3.79 | 3.12 | 3.79 | 3.13 | 6.83 | -    | - | 1.89 | 1.88 | 1.81 | 1.81 | 1.79 | 1.72 | - | - | -    | -    | 12.29 |
| 74 | 3.43 | 3.41 | -    | 3.84 | 3.08 | 3.83 | 3.09 | 6.84 | -    | - | 1.90 | 1.90 | 1.81 | 1.81 | 1.79 | 1.67 | - | - | -    | -    | 12.31 |
| 75 | 3.33 | 3.28 | 0.22 | 3.07 | 3.85 | 3.86 | 3.06 | 6.85 | -    | - | 1.91 | 1.91 | 1.81 | 1.81 | 1.79 | 1.60 | - | - | -    | -    | 12.33 |
| 76 | 3.24 | 3.19 | 0.39 | 3.06 | 3.86 | 3.86 | 3.06 | 6.85 | -    | - | 1.93 | 1.93 | 1.82 | 1.81 | 1.79 | 1.53 | - | - | -    | -    | 12.37 |
| 77 | 3.16 | 3.09 | 0.53 | 3.07 | 3.87 | 3.86 | 3.07 | 6.86 | -    | - | 1.94 | 1.95 | 1.81 | 1.81 | 1.79 | 1.45 | - | - | -    | -    | 12.43 |
| 78 | 2.99 | 3.05 | 0.62 | 3.85 | 3.09 | 3.85 | 3.09 | 0.98 | 5.89 | - | 1.96 | 1.96 | 1.81 | 1.81 | 1.79 | -    | - | - | 0.76 | 0.72 | 12.46 |

|     |      |      |   |      |      |      |      |      |      |      |      |      |      |      |      |   |      |   |      |   |       |
|-----|------|------|---|------|------|------|------|------|------|------|------|------|------|------|------|---|------|---|------|---|-------|
| 79  | 2.94 | 3.06 | - | 3.83 | 3.11 | 3.83 | 3.10 | 1.09 | 5.78 | -    | 1.98 | 1.98 | 1.81 | 1.81 | 1.79 | - | 1.45 | - | 0.60 | - | 12.49 |
| 80  | 2.88 | 3.05 | - | 3.83 | 3.12 | 3.81 | 3.12 | 1.14 | 5.74 | -    | 2.00 | 2.00 | 1.81 | 1.81 | 1.78 | - | 1.51 | - | 0.54 | - | 12.52 |
| 81  | 2.84 | 3.03 | - | 3.82 | 3.13 | 3.80 | 3.14 | 1.15 | 5.75 | -    | 2.01 | 2.02 | 1.81 | 1.81 | 1.78 | - | 1.58 | - | 0.47 | - | 12.54 |
| 82  | 2.84 | 3.01 | - | 3.81 | 3.14 | 3.80 | 3.14 | 1.08 | 5.81 | -    | 2.02 | 2.02 | 1.81 | 1.81 | 1.78 | - | 1.60 | - | 0.43 | - | 12.55 |
| 83  | 2.83 | 2.99 | - | 3.80 | 3.15 | 3.79 | 3.15 | 1.03 | 5.87 | -    | 2.03 | 2.03 | 1.81 | 1.81 | 1.78 | - | 1.63 | - | 0.39 | - | 12.57 |
| 84  | 2.83 | 2.98 | - | 3.79 | 3.17 | 3.77 | 3.16 | 0.96 | 5.92 | -    | 2.04 | 2.04 | 1.81 | 1.81 | 1.78 | - | 1.64 | - | 0.36 | - | 12.58 |
| 85  | 2.82 | 2.96 | - | 3.77 | 3.17 | 3.78 | 3.16 | 5.98 | 0.90 | -    | 2.04 | 2.04 | 1.81 | 1.81 | 1.78 | - | 1.66 | - | 0.33 | - | 12.59 |
| 86  | 2.84 | 2.94 | - | 3.77 | 3.17 | 3.77 | 3.16 | 6.05 | 0.82 | -    | 2.05 | 2.05 | 1.81 | 1.80 | 1.78 | - | 1.67 | - | 0.31 | - | 12.60 |
| 87  | 2.81 | 2.94 | - | 3.77 | 3.18 | 3.76 | 3.17 | 6.12 | 0.74 | -    | 2.05 | 2.05 | 1.81 | 1.81 | 1.78 | - | 1.70 | - | 0.28 | - | 12.61 |
| 88  | 2.81 | 2.93 | - | 3.77 | 3.18 | 3.76 | 3.17 | 6.18 | 0.69 | -    | 2.06 | 2.05 | 1.81 | 1.80 | 1.78 | - | 1.70 | - | 0.26 | - | 12.62 |
| 89  | 2.80 | 2.93 | - | 3.77 | 3.17 | 3.76 | 3.17 | 6.87 | -    | -    | 2.06 | 2.06 | 1.81 | 1.81 | 1.79 | - | 1.71 | - | 0.25 | - | 12.63 |
| 90  | 2.80 | 2.92 | - | 3.77 | 3.17 | 3.76 | 3.18 | 6.87 | -    | -    | 2.06 | 2.06 | 1.81 | 1.81 | 1.78 | - | 1.72 | - | 0.25 | - | 12.64 |
| 91  | 2.80 | 2.91 | - | 3.77 | 3.18 | 3.76 | 3.18 | 6.87 | -    | -    | 2.06 | 2.06 | 1.80 | 1.81 | 1.79 | - | 1.73 | - | 0.24 | - | 12.64 |
| 92  | 2.79 | 2.91 | - | 3.77 | 3.18 | 3.75 | 3.20 | 6.87 | -    | -    | 2.06 | 2.06 | 1.80 | 1.81 | 1.79 | - | 1.74 | - | 0.23 | - | 12.65 |
| 93  | 2.79 | 2.89 | - | 3.76 | 3.19 | 3.74 | 3.20 | 6.86 | -    | -    | 2.06 | 2.06 | 1.80 | 1.81 | 1.79 | - | 1.76 | - | 0.23 | - | 12.65 |
| 94  | 2.80 | 2.89 | - | 3.75 | 3.19 | 3.74 | 3.20 | 6.86 | -    | -    | 2.06 | 2.06 | 1.80 | 1.81 | 1.79 | - | 1.76 | - | 0.23 | - | 12.66 |
| 95  | 2.79 | 2.89 | - | 3.75 | 3.19 | 3.74 | 3.21 | 6.86 | -    | -    | 2.07 | 2.06 | 1.80 | 1.81 | 1.79 | - | 1.77 | - | 0.23 | - | 12.66 |
| 96  | 2.78 | 2.89 | - | 3.75 | 3.19 | 3.74 | 3.21 | 6.86 | -    | -    | 2.07 | 2.06 | 1.80 | 1.81 | 1.79 | - | 1.77 | - | 0.23 | - | 12.67 |
| 97  | 2.79 | 2.88 | - | 3.75 | 3.19 | 3.75 | 3.20 | 6.86 | -    | -    | 2.07 | 2.06 | 1.80 | 1.81 | 1.79 | - | 1.77 | - | 0.23 | - | 12.67 |
| 98  | 2.78 | 2.87 | - | 3.75 | 3.19 | 3.74 | 3.20 | 6.85 | -    | -    | 2.07 | 2.06 | 1.80 | 1.81 | 1.79 | - | 1.79 | - | 0.23 | - | 12.68 |
| 99  | 2.79 | 2.86 | - | 3.74 | 3.19 | 3.75 | 3.20 | 6.86 | -    | -    | 2.07 | 2.06 | 1.81 | 1.81 | 1.79 | - | 1.80 | - | 0.23 | - | 12.68 |
| 100 | 2.79 | 2.86 | - | 3.74 | 3.18 | 3.75 | 3.20 | 3.49 | 3.35 | -    | 2.07 | 2.06 | 1.80 | 1.81 | 1.79 | - | 1.80 | - | 0.23 | - | 12.68 |
| 101 | 2.79 | 2.86 | - | 3.74 | 3.18 | 3.75 | 3.19 | 3.33 | 3.53 | -    | 2.06 | 2.06 | 1.80 | 1.81 | 1.79 | - | 1.81 | - | 0.23 | - | 12.69 |
| 102 | 2.87 | 2.77 | - | 3.75 | 3.18 | 3.19 | 3.75 | 3.47 | 3.39 | -    | 2.06 | 2.06 | 1.80 | 1.81 | 1.79 | - | 1.81 | - | 0.23 | - | 12.70 |
| 103 | 2.85 | 2.77 | - | 3.75 | 3.17 | 3.19 | 3.76 | 2.35 | 3.41 | 1.09 | 2.06 | 2.06 | 1.80 | 1.81 | 1.79 | - | 1.82 | - | 0.23 | - | 12.70 |
| 104 | 2.84 | 2.78 | - | 3.76 | 3.18 | 3.19 | 3.75 | 3.38 | 3.47 | -    | 2.06 | 2.05 | 1.80 | 1.81 | 1.79 | - | 1.83 | - | 0.23 | - | 12.71 |
| 105 | 2.84 | 2.77 | - | 3.76 | 3.18 | 3.19 | 3.76 | 3.23 | 3.48 | -    | 2.06 | 2.05 | 1.80 | 1.81 | 1.79 | - | 1.83 | - | 0.23 | - | 12.71 |
| 106 | 2.83 | 2.77 | - | 3.76 | 3.17 | 3.18 | 3.76 | 3.36 | 3.49 | -    | 2.06 | 2.05 | 1.80 | 1.81 | 1.80 | - | 1.84 | - | 0.24 | - | 12.72 |
| 107 | 2.82 | 2.78 | - | 3.76 | 3.17 | 3.18 | 3.76 | 3.36 | 3.48 | -    | 2.05 | 2.05 | 1.80 | 1.81 | 1.80 | - | 1.85 | - | 0.24 | - | 12.72 |
| 108 | 2.81 | 2.77 | - | 3.78 | 3.16 | 3.17 | 3.78 | 3.34 | 3.49 | -    | 2.05 | 2.04 | 1.80 | 1.81 | 1.80 | - | 1.85 | - | 0.24 | - | 12.72 |
| 109 | 2.81 | 2.79 | - | 3.78 | 3.16 | 3.16 | 3.79 | 3.33 | 3.51 | -    | 2.05 | 2.04 | 1.80 | 1.81 | 1.80 | - | 1.85 | - | 0.25 | - | 12.73 |
| 110 | 2.78 | 2.79 | - | 3.80 | 3.16 | 3.15 | 3.80 | 3.32 | 3.52 | -    | 2.05 | 2.04 | 1.80 | 1.81 | 1.80 | - | 1.86 | - | 0.25 | - | 12.73 |
| 111 | 2.77 | 2.79 | - | 3.79 | 3.16 | 3.16 | 3.79 | 3.32 | 3.52 | -    | 2.05 | 2.03 | 1.80 | 1.81 | 1.80 | - | 1.87 | - | 0.26 | - | 12.74 |
| 112 | 2.75 | 2.80 | - | 3.79 | 3.15 | 3.15 | 3.80 | 3.30 | 3.53 | -    | 2.04 | 2.03 | 1.80 | 1.81 | 1.80 | - | 1.87 | - | 0.26 | - | 12.74 |
| 113 | 2.76 | 2.80 | - | 3.80 | 3.14 | 3.14 | 3.81 | 3.29 | 3.54 | -    | 2.04 | 2.03 | 1.80 | 1.81 | 1.80 | - | 1.87 | - | 0.27 | - | 12.75 |

|     |      |      |   |      |      |      |      |      |      |      |      |      |      |      |      |   |      |      |      |   |       |
|-----|------|------|---|------|------|------|------|------|------|------|------|------|------|------|------|---|------|------|------|---|-------|
| 114 | 2.78 | 2.77 | - | 3.81 | 3.13 | 3.12 | 3.82 | 3.31 | 3.51 | -    | 2.04 | 2.02 | 1.80 | 1.81 | 1.80 | - | 1.87 | -    | 0.27 | - | 12.75 |
| 115 | 5.55 | -    | - | 3.13 | 3.82 | 3.12 | 3.83 | 3.28 | 3.53 | -    | 2.04 | 2.02 | 1.80 | 1.81 | 1.80 | - | 1.88 | -    | 0.27 | - | 12.76 |
| 116 | 5.55 | -    | - | 3.12 | 3.82 | 3.12 | 3.82 | 3.23 | 3.33 | 0.27 | 2.03 | 2.02 | 1.80 | 1.81 | 1.80 | - | 1.89 | -    | 0.27 | - | 12.76 |
| 117 | 5.54 | -    | - | 3.11 | 3.83 | 3.12 | 3.82 | 3.22 | 3.34 | 0.27 | 2.03 | 2.02 | 1.80 | 1.81 | 1.80 | - | 1.89 | -    | 0.28 | - | 12.76 |
| 118 | 5.53 | -    | - | 3.10 | 3.84 | 3.10 | 3.84 | 3.20 | 3.33 | 0.29 | 2.03 | 2.01 | 1.80 | 1.81 | 1.80 | - | 1.90 | -    | 0.28 | - | 12.77 |
| 119 | 5.53 | -    | - | 3.10 | 3.83 | 3.09 | 3.85 | 3.18 | 3.33 | 0.30 | 2.02 | 2.01 | 1.80 | 1.81 | 1.80 | - | 1.89 | -    | 0.29 | - | 12.77 |
| 120 | 5.53 | -    | - | 3.09 | 3.84 | 3.08 | 3.86 | 3.18 | 3.35 | 0.33 | 2.03 | 2.01 | 1.80 | 1.81 | 1.80 | - | 1.89 | -    | 0.25 | - | 12.78 |
| 121 | 5.53 | -    | - | 3.08 | 3.85 | 3.05 | 3.88 | 3.15 | 3.34 | 0.34 | 2.01 | 2.00 | 1.80 | 1.81 | 1.80 | - | 1.90 | -    | 0.30 | - | 12.78 |
| 122 | 5.52 | -    | - | 3.07 | 3.86 | 3.06 | 3.88 | 3.13 | 3.34 | 0.36 | 2.01 | 2.00 | 1.80 | 1.81 | 1.80 | - | 1.90 | -    | 0.30 | - | 12.79 |
| 123 | 5.52 | -    | - | 3.07 | 3.86 | 3.06 | 3.87 | 3.10 | 3.34 | 0.38 | 2.01 | 1.99 | 1.80 | 1.81 | 1.80 | - | 1.91 | -    | 0.31 | - | 12.79 |
| 124 | 5.52 | -    | - | 3.06 | 3.87 | 6.93 | -    | 3.04 | 3.36 | 0.40 | 2.00 | 1.99 | 1.80 | 1.80 | 1.80 | - | 1.91 | -    | 0.31 | - | 12.80 |
| 125 | 5.53 | -    | - | 6.93 | -    | 6.92 | -    | 2.98 | 3.38 | 0.43 | 2.00 | 1.98 | 1.80 | 1.80 | 1.80 | - | 1.91 | -    | 0.32 | - | 12.80 |
| 126 | 5.51 | -    | - | 6.93 | -    | 6.92 | -    | 3.01 | 3.34 | 0.45 | 1.99 | 1.98 | 1.80 | 1.81 | 1.80 | - | 1.91 | -    | 0.32 | - | 12.81 |
| 127 | 5.51 | -    | - | 6.92 | -    | 6.91 | -    | 6.43 | -    | 0.53 | 1.99 | 1.98 | 1.80 | 1.80 | 1.81 | - | 1.91 | -    | 0.17 | - | 12.81 |
| 128 | 5.52 | -    | - | 6.92 | -    | 6.91 | -    | 6.34 | -    | -    | 1.98 | 1.97 | 1.80 | 1.81 | 1.81 | - | 1.91 | 0.82 | -    | - | 12.81 |
| 129 | 5.51 | -    | - | 6.93 | -    | 6.91 | -    | 6.32 | -    | -    | 1.98 | 1.97 | 1.80 | 1.81 | 1.80 | - | 1.91 | 0.84 | -    | - | 12.82 |
| 130 | 5.51 | -    | - | 6.93 | -    | 6.92 | -    | 6.27 | -    | -    | 1.97 | 1.96 | 1.80 | 1.81 | 1.80 | - | 1.92 | 0.87 | -    | - | 12.82 |
| 131 | 5.51 | -    | - | 6.93 | -    | 6.92 | -    | 1.97 | -    | -    | 1.97 | 1.96 | 1.80 | 1.81 | 1.80 | - | 1.92 | 0.90 | -    | - | 12.82 |
| 132 | 5.51 | -    | - | 6.93 | -    | 6.92 | -    | 6.21 | -    | -    | 1.97 | 1.95 | 1.80 | 1.81 | 1.80 | - | 1.92 | 0.92 | -    | - | 12.82 |
| 133 | 5.50 | -    | - | 6.93 | -    | 6.94 | -    | 6.19 | -    | -    | 1.96 | 1.95 | 1.80 | 1.81 | 1.80 | - | 1.92 | 0.95 | -    | - | 12.83 |
| 134 | 5.50 | -    | - | 6.94 | -    | 6.93 | -    | 6.18 | -    | -    | 1.96 | 1.95 | 1.80 | 1.80 | 1.81 | - | 1.92 | 0.97 | -    | - | 12.83 |
| 135 | 5.49 | -    | - | 6.93 | -    | 6.92 | -    | 6.19 | -    | -    | 1.96 | 1.94 | 1.80 | 1.80 | 1.81 | - | 1.92 | 0.99 | -    | - | 12.83 |
| 136 | 5.50 | -    | - | 6.93 | -    | 6.93 | -    | 6.16 | -    | -    | 1.95 | 1.94 | 1.80 | 1.80 | 1.81 | - | 1.92 | 1.02 | -    | - | 12.83 |
| 137 | 5.49 | -    | - | 6.93 | -    | 6.92 | -    | 6.15 | -    | -    | 1.94 | 1.93 | 1.80 | 1.80 | 1.81 | - | 1.92 | 1.05 | -    | - | 12.83 |
| 138 | 5.50 | -    | - | 6.93 | -    | 6.93 | -    | 6.11 | -    | -    | 1.94 | 1.93 | 1.80 | 1.80 | 1.81 | - | 1.92 | 1.07 | -    | - | 12.84 |
| 139 | 5.50 | -    | - | 6.93 | -    | 6.94 | -    | 6.09 | -    | -    | 1.94 | 1.92 | 1.81 | 1.80 | 1.81 | - | 1.92 | 1.10 | -    | - | 12.84 |
| 140 | 5.49 | -    | - | 6.93 | -    | 6.94 | -    | 6.07 | -    | -    | 1.93 | 1.92 | 1.81 | 1.80 | 1.81 | - | 1.92 | 1.13 | -    | - | 12.84 |
| 141 | 5.50 | -    | - | 6.92 | -    | 6.93 | -    | 6.06 | -    | -    | 1.93 | 1.91 | 1.81 | 1.80 | 1.81 | - | 1.93 | 1.15 | -    | - | 12.84 |
| 142 | 5.50 | -    | - | 6.92 | -    | 6.93 | -    | 6.04 | -    | -    | 1.92 | 1.91 | 1.81 | 1.81 | 1.81 | - | 1.92 | 1.18 | -    | - | 12.84 |
| 143 | 5.50 | -    | - | 6.93 | -    | 6.92 | -    | 6.01 | -    | -    | 1.92 | 1.90 | 1.81 | 1.81 | 1.81 | - | 1.93 | 1.21 | -    | - | 12.84 |
| 144 | 5.50 | -    | - | 6.93 | -    | 6.92 | -    | 6.00 | -    | -    | 1.91 | 1.90 | 1.81 | 1.81 | 1.81 | - | 1.92 | 1.23 | -    | - | 12.84 |
| 145 | 5.50 | -    | - | 6.93 | -    | 6.92 | -    | 5.98 | -    | -    | 1.91 | 1.90 | 1.81 | 1.80 | 1.81 | - | 1.92 | 1.26 | -    | - | 12.84 |
| 146 | 5.51 | -    | - | 6.93 | -    | 6.92 | -    | 5.96 | -    | -    | 1.91 | 1.89 | 1.81 | 1.80 | 1.81 | - | 1.92 | 1.28 | -    | - | 12.84 |
| 147 | 5.51 | -    | - | 6.92 | -    | 6.92 | -    | 5.95 | -    | -    | 1.90 | 1.89 | 1.81 | 1.80 | 1.81 | - | 1.92 | 1.30 | -    | - | 12.84 |
| 148 | 5.51 | -    | - | 6.92 | -    | 6.93 | -    | 5.94 | -    | -    | 1.90 | 1.89 | 1.81 | 1.80 | 1.81 | - | 1.92 | 1.32 | -    | - | 12.84 |

|     |      |   |   |      |      |      |      |      |   |   |      |      |      |      |      |   |      |      |   |   |       |
|-----|------|---|---|------|------|------|------|------|---|---|------|------|------|------|------|---|------|------|---|---|-------|
| 149 | 5.50 | - | - | 6.91 | -    | 6.92 | -    | 5.93 | - | - | 1.90 | 1.88 | 1.81 | 1.80 | 1.81 | - | 1.92 | 1.33 | - | - | 12.84 |
| 150 | 5.51 | - | - | 6.92 | -    | 6.92 | -    | 5.91 | - | - | 1.90 | 1.88 | 1.81 | 1.80 | 1.81 | - | 1.90 | 1.35 | - | - | 12.84 |
| 151 | 5.51 | - | - | 6.92 | -    | 6.93 | -    | 5.90 | - | - | 1.90 | 1.88 | 1.81 | 1.81 | 1.81 | - | 1.90 | 1.36 | - | - | 12.84 |
| 152 | 5.51 | - | - | 6.92 | -    | 6.93 | -    | 5.90 | - | - | 1.90 | 1.88 | 1.81 | 1.80 | 1.81 | - | 1.91 | 1.37 | - | - | 12.84 |
| 153 | 5.51 | - | - | 6.92 | -    | 6.92 | -    | 5.89 | - | - | 1.90 | 1.88 | 1.81 | 1.80 | 1.81 | - | 1.91 | 1.38 | - | - | 12.83 |
| 154 | 5.52 | - | - | 6.92 | -    | 6.92 | -    | 5.89 | - | - | 1.90 | 1.87 | 1.81 | 1.80 | 1.81 | - | 1.90 | 1.38 | - | - | 12.83 |
| 155 | 5.51 | - | - | 6.92 | -    | 6.92 | -    | 5.89 | - | - | 1.90 | 1.88 | 1.81 | 1.80 | 1.81 | - | 1.90 | 1.39 | - | - | 12.83 |
| 156 | 5.52 | - | - | 6.92 | -    | 6.93 | -    | 5.88 | - | - | 1.90 | 1.88 | 1.82 | 1.80 | 1.81 | - | 1.89 | 1.39 | - | - | 12.83 |
| 157 | 5.53 | - | - | 6.91 | -    | 6.92 | -    | 5.88 | - | - | 1.89 | 1.88 | 1.81 | 1.80 | 1.81 | - | 1.90 | 1.40 | - | - | 12.83 |
| 158 | 5.54 | - | - | 3.82 | 3.10 | 6.91 | -    | 5.88 | - | - | 1.89 | 1.88 | 1.82 | 1.80 | 1.81 | - | 1.89 | 1.40 | - | - | 12.83 |
| 159 | 5.54 | - | - | 3.83 | 3.09 | 3.13 | 3.79 | 5.87 | - | - | 1.89 | 1.88 | 1.81 | 1.80 | 1.81 | - | 1.89 | 1.40 | - | - | 12.82 |
| 160 | 5.55 | - | - | 3.78 | 3.14 | 3.14 | 3.79 | 5.86 | - | - | 1.89 | 1.88 | 1.81 | 1.80 | 1.81 | - | 1.88 | 1.40 | - | - | 12.82 |
| 161 | 5.55 | - | - | 3.77 | 3.16 | 3.15 | 3.77 | 5.85 | - | - | 1.89 | 1.88 | 1.81 | 1.80 | 1.81 | - | 1.88 | 1.41 | - | - | 12.82 |
| 162 | 5.56 | - | - | 3.73 | 3.19 | 3.18 | 3.75 | 5.85 | - | - | 1.89 | 1.88 | 1.81 | 1.80 | 1.81 | - | 1.88 | 1.41 | - | - | 12.82 |
| 163 | 5.56 | - | - | 3.71 | 3.21 | 3.21 | 3.71 | 5.84 | - | - | 1.89 | 1.88 | 1.81 | 1.81 | 1.81 | - | 1.87 | 1.41 | - | - | 12.82 |
| 164 | 5.57 | - | - | 3.68 | 3.24 | 3.25 | 3.68 | 5.84 | - | - | 1.89 | 1.88 | 1.81 | 1.80 | 1.81 | - | 1.88 | 1.41 | - | - | 12.82 |
| 165 | 5.57 | - | - | 3.65 | 3.26 | 3.29 | 3.63 | 5.84 | - | - | 1.89 | 1.88 | 1.81 | 1.80 | 1.81 | - | 1.87 | 1.41 | - | - | 12.81 |
| 166 | 5.55 | - | - | 3.63 | 3.29 | 3.31 | 3.61 | 5.85 | - | - | 1.89 | 1.88 | 1.81 | 1.80 | 1.81 | - | 1.87 | 1.42 | - | - | 12.81 |
| 167 | 5.57 | - | - | 3.59 | 3.33 | 3.34 | 3.58 | 5.84 | - | - | 1.89 | 1.88 | 1.81 | 1.80 | 1.81 | - | 1.87 | 1.41 | - | - | 12.81 |
| 168 | 5.57 | - | - | 3.55 | 3.38 | 3.36 | 3.56 | 5.83 | - | - | 1.89 | 1.88 | 1.81 | 1.80 | 1.81 | - | 1.87 | 1.42 | - | - | 12.81 |
| 169 | 5.57 | - | - | 3.53 | 3.40 | 3.40 | 3.53 | 5.83 | - | - | 1.89 | 1.88 | 1.81 | 1.80 | 1.81 | - | 1.87 | 1.42 | - | - | 12.81 |
| 170 | 5.57 | - | - | 3.51 | 3.42 | 3.43 | 3.50 | 5.84 | - | - | 1.89 | 1.88 | 1.81 | 1.80 | 1.81 | - | 1.87 | 1.41 | - | - | 12.81 |
| 171 | 5.56 | - | - | 3.49 | 3.44 | 3.47 | 3.47 | 5.83 | - | - | 1.89 | 1.88 | 1.81 | 1.80 | 1.81 | - | 1.87 | 1.41 | - | - | 12.81 |
| 172 | 5.57 | - | - | 3.47 | 3.47 | 3.49 | 3.43 | 5.83 | - | - | 1.89 | 1.88 | 1.81 | 1.80 | 1.81 | - | 1.87 | 1.42 | - | - | 12.81 |
| 173 | 5.58 | - | - | 3.44 | 3.50 | 3.50 | 3.42 | 5.83 | - | - | 1.90 | 1.88 | 1.81 | 1.80 | 1.81 | - | 1.86 | 1.41 | - | - | 12.80 |
| 174 | 5.58 | - | - | 3.42 | 3.51 | 3.52 | 3.40 | 5.83 | - | - | 1.90 | 1.88 | 1.81 | 1.80 | 1.81 | - | 1.86 | 1.42 | - | - | 12.80 |
| 175 | 5.59 | - | - | 3.39 | 3.54 | 3.53 | 3.38 | 5.82 | - | - | 1.90 | 1.88 | 1.81 | 1.80 | 1.81 | - | 1.86 | 1.42 | - | - | 12.80 |
| 176 | 5.58 | - | - | 3.38 | 3.56 | 3.57 | 3.36 | 5.82 | - | - | 1.90 | 1.88 | 1.81 | 1.80 | 1.81 | - | 1.86 | 1.42 | - | - | 12.80 |
| 177 | 5.58 | - | - | 3.35 | 3.59 | 3.58 | 3.35 | 5.81 | - | - | 1.89 | 1.87 | 1.81 | 1.81 | 1.81 | - | 1.86 | 1.42 | - | - | 12.80 |
| 178 | 5.59 | - | - | 3.33 | 3.60 | 3.62 | 3.31 | 5.81 | - | - | 1.90 | 1.88 | 1.81 | 1.81 | 1.81 | - | 1.86 | 1.43 | - | - | 12.80 |
| 179 | 5.58 | - | - | 3.31 | 3.63 | 3.63 | 3.31 | 5.81 | - | - | 1.90 | 1.87 | 1.81 | 1.80 | 1.81 | - | 1.85 | 1.43 | - | - | 12.80 |
| 180 | 5.59 | - | - | 3.30 | 3.62 | 3.64 | 3.30 | 5.82 | - | - | 1.89 | 1.87 | 1.81 | 1.80 | 1.81 | - | 1.85 | 1.43 | - | - | 12.80 |
| 181 | 5.59 | - | - | 3.28 | 3.62 | 3.66 | 3.28 | 5.82 | - | - | 1.89 | 1.87 | 1.81 | 1.80 | 1.81 | - | 1.86 | 1.43 | - | - | 12.80 |
| 182 | 5.59 | - | - | 3.28 | 3.63 | 3.65 | 3.28 | 5.82 | - | - | 1.89 | 1.87 | 1.82 | 1.80 | 1.81 | - | 1.86 | 1.43 | - | - | 12.81 |
| 183 | 5.58 | - | - | 3.28 | 3.65 | 3.65 | 3.28 | 5.81 | - | - | 1.90 | 1.87 | 1.81 | 1.80 | 1.81 | - | 1.85 | 1.43 | - | - | 12.81 |

|     |      |   |   |      |      |      |      |      |   |   |      |      |      |      |      |   |      |      |   |   |       |
|-----|------|---|---|------|------|------|------|------|---|---|------|------|------|------|------|---|------|------|---|---|-------|
| 184 | 5.59 | - | - | 3.28 | 3.66 | 3.66 | 3.27 | 5.83 | - | - | 1.90 | 1.87 | 1.81 | 1.80 | 1.81 | - | 1.85 | 1.43 | - | - | 12.81 |
| 185 | 5.58 | - | - | 3.30 | 3.62 | 3.66 | 3.26 | 5.83 | - | - | 1.90 | 1.88 | 1.81 | 1.80 | 1.81 | - | 1.85 | 1.43 | - | - | 12.80 |
| 186 | 5.59 | - | - | 3.29 | 3.62 | 3.64 | 3.28 | 5.83 | - | - | 1.90 | 1.88 | 1.81 | 1.80 | 1.81 | - | 1.85 | 1.43 | - | - | 12.81 |
| 187 | 5.58 | - | - | 3.28 | 3.62 | 3.64 | 3.29 | 5.83 | - | - | 1.89 | 1.88 | 1.81 | 1.80 | 1.81 | - | 1.85 | 1.43 | - | - | 12.80 |
| 188 | 5.58 | - | - | 3.29 | 3.63 | 3.65 | 3.28 | 5.82 | - | - | 1.89 | 1.88 | 1.82 | 1.80 | 1.81 | - | 1.85 | 1.43 | - | - | 12.81 |
| 189 | 5.57 | - | - | 3.29 | 3.64 | 3.27 | 3.67 | 5.82 | - | - | 1.89 | 1.88 | 1.81 | 1.81 | 1.81 | - | 1.86 | 1.43 | - | - | 12.81 |
| 190 | 5.58 | - | - | 3.29 | 3.65 | 3.27 | 3.67 | 5.82 | - | - | 1.90 | 1.88 | 1.81 | 1.81 | 1.81 | - | 1.85 | 1.43 | - | - | 12.81 |
| 191 | 5.59 | - | - | 3.28 | 3.65 | 3.66 | 3.28 | 5.81 | - | - | 1.89 | 1.88 | 1.81 | 1.81 | 1.81 | - | 1.85 | 1.43 | - | - | 12.81 |
| 192 | 5.58 | - | - | 3.28 | 3.64 | 3.66 | 3.27 | 5.82 | - | - | 1.89 | 1.88 | 1.81 | 1.80 | 1.81 | - | 1.86 | 1.43 | - | - | 12.81 |
| 193 | 5.58 | - | - | 3.28 | 3.64 | 3.66 | 3.28 | 5.82 | - | - | 1.89 | 1.88 | 1.81 | 1.80 | 1.81 | - | 1.86 | 1.42 | - | - | 12.81 |
| 194 | 5.58 | - | - | 3.28 | 3.65 | 3.67 | 3.26 | 5.81 | - | - | 1.89 | 1.88 | 1.81 | 1.80 | 1.81 | - | 1.86 | 1.42 | - | - | 12.81 |
| 195 | 5.59 | - | - | 3.28 | 3.65 | 3.66 | 3.26 | 5.82 | - | - | 1.89 | 1.88 | 1.81 | 1.80 | 1.81 | - | 1.86 | 1.43 | - | - | 12.81 |
| 196 | 5.59 | - | - | 3.29 | 3.64 | 3.65 | 3.28 | 5.82 | - | - | 1.90 | 1.88 | 1.82 | 1.80 | 1.81 | - | 1.85 | 1.43 | - | - | 12.81 |
| 197 | 5.58 | - | - | 3.28 | 3.65 | 3.66 | 3.27 | 5.82 | - | - | 1.90 | 1.88 | 1.82 | 1.81 | 1.81 | - | 1.86 | 1.43 | - | - | 12.81 |
| 198 | 5.58 | - | - | 3.29 | 3.64 | 3.65 | 3.28 | 5.82 | - | - | 1.90 | 1.88 | 1.81 | 1.81 | 1.81 | - | 1.86 | 1.43 | - | - | 12.81 |
| 199 | 5.58 | - | - | 3.29 | 3.65 | 3.65 | 3.28 | 5.82 | - | - | 1.90 | 1.87 | 1.82 | 1.81 | 1.81 | - | 1.86 | 1.43 | - | - | 12.81 |
| 200 | 5.58 | - | - | 3.28 | 3.66 | 3.66 | 3.26 | 5.82 | - | - | 1.90 | 1.88 | 1.82 | 1.81 | 1.81 | - | 1.86 | 1.43 | - | - | 12.81 |
| 201 | 5.58 | - | - | 3.28 | 3.64 | 3.26 | 3.67 | 5.80 | - | - | 1.90 | 1.87 | 1.82 | 1.81 | 1.81 | - | 1.86 | 1.43 | - | - | 12.82 |
| 202 | 5.58 | - | - | 3.28 | 3.65 | 3.65 | 3.28 | 5.82 | - | - | 1.90 | 1.87 | 1.82 | 1.81 | 1.81 | - | 1.86 | 1.43 | - | - | 12.82 |
| 203 | 5.59 | - | - | 3.28 | 3.65 | 3.66 | 3.27 | 5.81 | - | - | 1.90 | 1.87 | 1.82 | 1.81 | 1.81 | - | 1.86 | 1.43 | - | - | 12.82 |
| 204 | 5.59 | - | - | 3.29 | 3.64 | 3.66 | 3.28 | 5.81 | - | - | 1.90 | 1.87 | 1.82 | 1.80 | 1.81 | - | 1.86 | 1.43 | - | - | 12.82 |
| 205 | 5.58 | - | - | 3.29 | 3.63 | 3.65 | 3.27 | 5.81 | - | - | 1.90 | 1.87 | 1.82 | 1.80 | 1.81 | - | 1.86 | 1.43 | - | - | 12.82 |
| 206 | 5.58 | - | - | 3.29 | 3.63 | 3.64 | 3.30 | 5.81 | - | - | 1.90 | 1.88 | 1.82 | 1.80 | 1.81 | - | 1.85 | 1.42 | - | - | 12.82 |
| 207 | 5.58 | - | - | 3.28 | 3.63 | 3.64 | 3.30 | 5.81 | - | - | 1.90 | 1.88 | 1.81 | 1.80 | 1.80 | - | 1.85 | 1.42 | - | - | 12.82 |
| 208 | 5.58 | - | - | 3.28 | 3.64 | 3.65 | 3.29 | 5.81 | - | - | 1.90 | 1.87 | 1.81 | 1.80 | 1.81 | - | 1.86 | 1.42 | - | - | 12.82 |
| 209 | 5.58 | - | - | 3.29 | 3.64 | 3.65 | 3.29 | 5.82 | - | - | 1.90 | 1.87 | 1.81 | 1.81 | 1.81 | - | 1.86 | 1.42 | - | - | 12.82 |
| 210 | 5.58 | - | - | 3.29 | 3.64 | 3.65 | 3.28 | 5.82 | - | - | 1.90 | 1.87 | 1.81 | 1.81 | 1.81 | - | 1.85 | 1.43 | - | - | 12.82 |
| 211 | 5.59 | - | - | 3.29 | 3.65 | 3.65 | 3.27 | 5.82 | - | - | 1.90 | 1.87 | 1.81 | 1.81 | 1.81 | - | 1.85 | 1.43 | - | - | 12.82 |
| 212 | 5.58 | - | - | 3.29 | 3.65 | 3.65 | 3.27 | 5.81 | - | - | 1.90 | 1.87 | 1.82 | 1.81 | 1.81 | - | 1.86 | 1.43 | - | - | 12.82 |
| 213 | 5.58 | - | - | 3.28 | 3.65 | 3.64 | 3.28 | 5.81 | - | - | 1.90 | 1.87 | 1.82 | 1.81 | 1.81 | - | 1.86 | 1.43 | - | - | 12.82 |
| 214 | 5.58 | - | - | 3.28 | 3.65 | 3.63 | 3.28 | 5.81 | - | - | 1.90 | 1.87 | 1.82 | 1.80 | 1.81 | - | 1.86 | 1.43 | - | - | 12.82 |
| 215 | 5.58 | - | - | 3.28 | 3.65 | 3.65 | 3.27 | 5.81 | - | - | 1.90 | 1.87 | 1.82 | 1.80 | 1.81 | - | 1.86 | 1.43 | - | - | 12.82 |
| 216 | 5.59 | - | - | 3.29 | 3.64 | 3.65 | 3.27 | 5.80 | - | - | 1.90 | 1.88 | 1.82 | 1.80 | 1.81 | - | 1.85 | 1.43 | - | - | 12.82 |
| 217 | 5.58 | - | - | 3.29 | 3.65 | 3.65 | 3.28 | 5.80 | - | - | 1.90 | 1.88 | 1.81 | 1.80 | 1.81 | - | 1.85 | 1.43 | - | - | 12.82 |
| 218 | 5.59 | - | - | 3.28 | 3.65 | 3.65 | 3.28 | 5.80 | - | - | 1.91 | 1.88 | 1.81 | 1.81 | 1.80 | - | 1.85 | 1.43 | - | - | 12.82 |

|     |      |   |   |      |      |      |      |      |   |   |      |      |      |      |      |   |      |      |   |   |       |
|-----|------|---|---|------|------|------|------|------|---|---|------|------|------|------|------|---|------|------|---|---|-------|
| 219 | 5.58 | - | - | 3.26 | 3.66 | 3.65 | 3.28 | 5.81 | - | - | 1.91 | 1.88 | 1.81 | 1.81 | 1.80 | - | 1.85 | 1.43 | - | - | 12.82 |
| 220 | 5.59 | - | - | 3.27 | 3.66 | 3.66 | 3.27 | 5.82 | - | - | 1.90 | 1.88 | 1.81 | 1.81 | 1.81 | - | 1.85 | 1.43 | - | - | 12.82 |
| 221 | 5.59 | - | - | 3.28 | 3.66 | 3.66 | 3.27 | 5.82 | - | - | 1.90 | 1.87 | 1.81 | 1.81 | 1.81 | - | 1.85 | 1.43 | - | - | 12.82 |
| 222 | 5.60 | - | - | 3.28 | 3.65 | 3.65 | 3.28 | 5.82 | - | - | 1.91 | 1.87 | 1.82 | 1.81 | 1.81 | - | 1.85 | 1.43 | - | - | 12.82 |
| 223 | 5.59 | - | - | 3.27 | 3.65 | 3.65 | 3.28 | 5.82 | - | - | 1.90 | 1.87 | 1.82 | 1.81 | 1.81 | - | 1.85 | 1.43 | - | - | 12.82 |
| 224 | 5.59 | - | - | 3.28 | 3.65 | 3.66 | 3.28 | 5.82 | - | - | 1.90 | 1.87 | 1.81 | 1.81 | 1.81 | - | 1.85 | 1.43 | - | - | 12.82 |
| 225 | 5.59 | - | - | 3.28 | 3.65 | 3.66 | 3.28 | 5.81 | - | - | 1.90 | 1.87 | 1.82 | 1.81 | 1.81 | - | 1.85 | 1.43 | - | - | 12.82 |
| 226 | 5.59 | - | - | 3.28 | 3.65 | 3.66 | 3.27 | 5.81 | - | - | 1.90 | 1.87 | 1.82 | 1.81 | 1.81 | - | 1.86 | 1.43 | - | - | 12.82 |
| 227 | 5.59 | - | - | 3.28 | 3.64 | 3.66 | 3.27 | 5.81 | - | - | 1.90 | 1.87 | 1.82 | 1.80 | 1.82 | - | 1.86 | 1.43 | - | - | 12.82 |
| 228 | 5.59 | - | - | 3.29 | 3.63 | 3.66 | 3.27 | 5.81 | - | - | 1.90 | 1.87 | 1.82 | 1.81 | 1.82 | - | 1.86 | 1.43 | - | - | 12.82 |
| 229 | 5.60 | - | - | 3.28 | 3.64 | 3.66 | 3.27 | 5.81 | - | - | 1.90 | 1.87 | 1.82 | 1.80 | 1.81 | - | 1.86 | 1.43 | - | - | 12.82 |
| 230 | 5.59 | - | - | 3.28 | 3.65 | 3.67 | 3.27 | 5.81 | - | - | 1.91 | 1.87 | 1.81 | 1.81 | 1.81 | - | 1.86 | 1.43 | - | - | 12.82 |
| 231 | 5.59 | - | - | 3.28 | 3.65 | 3.67 | 3.27 | 5.82 | - | - | 1.91 | 1.87 | 1.82 | 1.81 | 1.80 | - | 1.86 | 1.43 | - | - | 12.82 |
| 232 | 5.59 | - | - | 3.28 | 3.65 | 3.67 | 3.27 | 5.81 | - | - | 1.91 | 1.87 | 1.82 | 1.81 | 1.80 | - | 1.85 | 1.43 | - | - | 12.82 |
| 233 | 5.59 | - | - | 3.28 | 3.66 | 3.25 | 3.69 | 5.81 | - | - | 1.90 | 1.87 | 1.82 | 1.81 | 1.80 | - | 1.85 | 1.43 | - | - | 12.82 |
| 234 | 5.59 | - | - | 3.29 | 3.65 | 3.66 | 3.27 | 5.81 | - | - | 1.90 | 1.87 | 1.82 | 1.81 | 1.80 | - | 1.86 | 1.43 | - | - | 12.82 |
| 235 | 5.59 | - | - | 3.29 | 3.66 | 3.66 | 3.28 | 5.81 | - | - | 1.90 | 1.87 | 1.82 | 1.81 | 1.80 | - | 1.85 | 1.43 | - | - | 12.82 |
| 236 | 5.58 | - | - | 3.28 | 3.66 | 3.26 | 3.68 | 5.81 | - | - | 1.91 | 1.86 | 1.82 | 1.81 | 1.81 | - | 1.86 | 1.43 | - | - | 12.82 |
| 237 | 5.58 | - | - | 3.28 | 3.66 | 3.65 | 3.27 | 5.81 | - | - | 1.91 | 1.87 | 1.81 | 1.81 | 1.81 | - | 1.86 | 1.43 | - | - | 12.82 |
| 238 | 5.59 | - | - | 3.28 | 3.66 | 3.24 | 3.69 | 5.80 | - | - | 1.91 | 1.87 | 1.81 | 1.81 | 1.81 | - | 1.85 | 1.43 | - | - | 12.82 |
| 239 | 5.58 | - | - | 3.27 | 3.65 | 3.66 | 3.27 | 5.81 | - | - | 1.91 | 1.87 | 1.82 | 1.80 | 1.81 | - | 1.86 | 1.43 | - | - | 12.82 |
| 240 | 5.58 | - | - | 3.28 | 3.65 | 3.66 | 3.27 | 5.81 | - | - | 1.91 | 1.87 | 1.81 | 1.80 | 1.81 | - | 1.86 | 1.43 | - | - | 12.83 |
| 241 | 5.58 | - | - | 3.27 | 3.65 | 3.66 | 3.28 | 5.81 | - | - | 1.91 | 1.87 | 1.82 | 1.80 | 1.82 | - | 1.86 | 1.43 | - | - | 12.82 |
| 242 | 5.57 | - | - | 3.27 | 3.65 | 3.66 | 3.28 | 5.81 | - | - | 1.91 | 1.87 | 1.82 | 1.81 | 1.81 | - | 1.86 | 1.43 | - | - | 12.83 |
| 243 | 5.58 | - | - | 3.28 | 3.65 | 3.65 | 3.27 | 5.81 | - | - | 1.91 | 1.87 | 1.81 | 1.81 | 1.81 | - | 1.86 | 1.43 | - | - | 12.83 |
| 244 | 5.59 | - | - | 3.27 | 3.66 | 3.65 | 3.27 | 5.82 | - | - | 1.90 | 1.87 | 1.81 | 1.81 | 1.81 | - | 1.86 | 1.43 | - | - | 12.83 |
| 245 | 5.58 | - | - | 3.27 | 3.66 | 3.66 | 3.27 | 5.81 | - | - | 1.91 | 1.87 | 1.82 | 1.80 | 1.80 | - | 1.86 | 1.43 | - | - | 12.83 |
| 246 | 5.58 | - | - | 3.27 | 3.66 | 3.66 | 3.26 | 5.80 | - | - | 1.91 | 1.87 | 1.82 | 1.81 | 1.80 | - | 1.86 | 1.43 | - | - | 12.83 |
| 247 | 5.58 | - | - | 3.27 | 3.66 | 3.67 | 3.26 | 5.81 | - | - | 1.91 | 1.87 | 1.82 | 1.81 | 1.80 | - | 1.85 | 1.44 | - | - | 12.83 |
| 248 | 5.57 | - | - | 3.28 | 3.66 | 3.67 | 3.25 | 5.81 | - | - | 1.91 | 1.86 | 1.82 | 1.81 | 1.80 | - | 1.86 | 1.44 | - | - | 12.82 |
| 249 | 5.57 | - | - | 3.28 | 3.66 | 3.67 | 3.27 | 5.80 | - | - | 1.91 | 1.87 | 1.82 | 1.81 | 1.80 | - | 1.86 | 1.43 | - | - | 12.82 |
| 250 | 5.58 | - | - | 3.27 | 3.66 | 3.66 | 3.26 | 5.80 | - | - | 1.91 | 1.87 | 1.82 | 1.81 | 1.80 | - | 1.86 | 1.43 | - | - | 12.83 |
| 251 | 5.58 | - | - | 3.27 | 3.66 | 3.66 | 3.27 | 5.80 | - | - | 1.91 | 1.87 | 1.82 | 1.80 | 1.81 | - | 1.85 | 1.43 | - | - | 12.83 |
| 252 | 5.58 | - | - | 3.27 | 3.66 | 3.67 | 3.26 | 5.80 | - | - | 1.91 | 1.87 | 1.82 | 1.80 | 1.81 | - | 1.85 | 1.43 | - | - | 12.83 |
| 253 | 5.59 | - | - | 3.27 | 3.66 | 3.68 | 3.25 | 5.81 | - | - | 1.91 | 1.87 | 1.82 | 1.80 | 1.81 | - | 1.86 | 1.43 | - | - | 12.83 |

|     |      |   |   |      |      |      |      |      |   |   |      |      |      |      |      |   |      |      |   |   |       |
|-----|------|---|---|------|------|------|------|------|---|---|------|------|------|------|------|---|------|------|---|---|-------|
| 254 | 5.59 | - | - | 3.26 | 3.67 | 3.68 | 3.25 | 5.81 | - | - | 1.90 | 1.87 | 1.82 | 1.80 | 1.81 | - | 1.86 | 1.43 | - | - | 12.83 |
| 255 | 5.58 | - | - | 3.27 | 3.66 | 3.68 | 3.25 | 5.80 | - | - | 1.91 | 1.87 | 1.82 | 1.80 | 1.81 | - | 1.86 | 1.43 | - | - | 12.83 |
| 256 | 5.58 | - | - | 3.27 | 3.66 | 3.67 | 3.25 | 5.80 | - | - | 1.91 | 1.87 | 1.82 | 1.80 | 1.81 | - | 1.86 | 1.44 | - | - | 12.83 |
| 257 | 5.59 | - | - | 3.27 | 3.66 | 3.68 | 3.25 | 5.80 | - | - | 1.91 | 1.87 | 1.82 | 1.81 | 1.81 | - | 1.86 | 1.44 | - | - | 12.83 |
| 258 | 5.58 | - | - | 3.27 | 3.66 | 3.67 | 3.25 | 5.80 | - | - | 1.91 | 1.87 | 1.82 | 1.81 | 1.81 | - | 1.86 | 1.44 | - | - | 12.83 |
| 259 | 5.58 | - | - | 3.27 | 3.66 | 3.68 | 3.24 | 5.79 | - | - | 1.91 | 1.87 | 1.82 | 1.81 | 1.81 | - | 1.86 | 1.43 | - | - | 12.83 |
| 260 | 5.58 | - | - | 3.27 | 3.66 | 3.68 | 3.24 | 5.80 | - | - | 1.91 | 1.87 | 1.82 | 1.81 | 1.81 | - | 1.86 | 1.43 | - | - | 12.83 |
| 261 | 5.58 | - | - | 3.27 | 3.66 | 3.67 | 3.26 | 5.81 | - | - | 1.91 | 1.87 | 1.82 | 1.81 | 1.80 | - | 1.86 | 1.42 | - | - | 12.83 |
| 262 | 5.58 | - | - | 3.27 | 3.66 | 3.67 | 3.26 | 5.81 | - | - | 1.91 | 1.87 | 1.82 | 1.81 | 1.80 | - | 1.86 | 1.43 | - | - | 12.83 |
| 263 | 5.58 | - | - | 3.27 | 3.66 | 3.68 | 3.25 | 5.80 | - | - | 1.91 | 1.87 | 1.82 | 1.81 | 1.80 | - | 1.86 | 1.43 | - | - | 12.83 |
| 264 | 5.58 | - | - | 3.26 | 3.67 | 3.68 | 3.25 | 5.80 | - | - | 1.91 | 1.87 | 1.82 | 1.81 | 1.81 | - | 1.86 | 1.43 | - | - | 12.83 |
| 265 | 5.58 | - | - | 3.26 | 3.66 | 3.68 | 3.26 | 5.80 | - | - | 1.91 | 1.87 | 1.82 | 1.80 | 1.80 | - | 1.86 | 1.43 | - | - | 12.83 |
| 266 | 5.58 | - | - | 3.24 | 3.67 | 3.68 | 3.25 | 5.79 | - | - | 1.91 | 1.87 | 1.82 | 1.81 | 1.81 | - | 1.86 | 1.43 | - | - | 12.83 |
| 267 | 5.59 | - | - | 3.25 | 3.65 | 3.68 | 3.25 | 5.79 | - | - | 1.91 | 1.87 | 1.82 | 1.81 | 1.81 | - | 1.86 | 1.43 | - | - | 12.83 |



ELF analysis for oxidation of furan **R2** and tetrahydrothiophene **R3**

**Table S12.** ELF basin populations for the oxidation of **R2**

|    | V1(O3) | V2(O3) | V3(O3) | V1(O4) | V2(O4) | V1(O5) | V2(O5) | V1(O6) | V2(O6) | V(C1,O10) | V(C9,O10) | V(C1,C2) | V(C2,C8) | V(C8,C9) | V1(O10) | V2(O10) | V(O3,H) | V(C1,H) | V(C1,O6) | V(C1) | V(H) | Ru    |
|----|--------|--------|--------|--------|--------|--------|--------|--------|--------|-----------|-----------|----------|----------|----------|---------|---------|---------|---------|----------|-------|------|-------|
| 1  | 6.86   | -      | -      | 6.86   | -      | 6.84   | -      | 6.90   | -      | 1.36      | 1.35      | 1.86     | 1.79     | 1.87     | 2.48    | 2.21    | -       | 2.06    | -        | -     | -    |       |
| 2  | 6.86   | -      | -      | 6.86   | -      | 6.86   | -      | 6.90   | -      | 1.36      | 1.35      | 1.86     | 1.79     | 1.87     | 2.48    | 2.21    | -       | 2.06    | -        | -     | -    | 12.13 |
| 3  | 6.86   | -      | -      | 6.86   | -      | 6.86   | -      | 6.90   | -      | 1.36      | 1.35      | 1.87     | 1.79     | 1.87     | 2.21    | 2.48    | -       | 2.07    | -        | -     | -    | 12.13 |
| 4  | 6.86   | -      | -      | 6.87   | -      | 6.86   | -      | 6.90   | -      | 1.36      | 1.35      | 1.86     | 1.79     | 1.87     | 2.47    | 2.21    | -       | 2.07    | -        | -     | -    | 12.13 |
| 5  | 6.86   | -      | -      | 6.87   | -      | 6.87   | -      | 6.91   | -      | 1.36      | 1.35      | 1.87     | 1.79     | 1.87     | 2.21    | 2.48    | -       | 2.06    | -        | -     | -    | 12.13 |
| 6  | 6.86   | -      | -      | 6.86   | -      | 6.87   | -      | 6.91   | -      | 1.35      | 1.35      | 1.87     | 1.79     | 1.87     | 2.22    | 2.48    | -       | 2.06    | -        | -     | -    | 12.14 |
| 7  | 6.86   | -      | -      | 6.86   | -      | 6.87   | -      | 6.91   | -      | 1.35      | 1.35      | 1.87     | 1.79     | 1.87     | 2.49    | 2.22    | -       | 2.06    | -        | -     | -    | 12.14 |
| 8  | 6.85   | -      | -      | 6.86   | -      | 6.86   | -      | 6.90   | -      | 1.36      | 1.35      | 1.87     | 1.79     | 1.87     | 2.48    | 2.22    | -       | 2.06    | -        | -     | -    | 12.13 |
| 9  | 6.85   | -      | -      | 6.85   | -      | 6.87   | -      | 6.89   | -      | 1.36      | 1.36      | 1.87     | 1.79     | 1.87     | 2.21    | 2.48    | -       | 2.06    | -        | -     | -    | 12.13 |
| 10 | 6.86   | -      | -      | 6.84   | -      | 6.87   | -      | 6.90   | -      | 1.36      | 1.36      | 1.87     | 1.79     | 1.87     | 2.22    | 2.48    | -       | 2.06    | -        | -     | -    | 12.13 |
| 11 | 6.85   | -      | -      | 6.85   | -      | 6.87   | -      | 6.90   | -      | 1.36      | 1.36      | 1.87     | 1.79     | 1.87     | 2.22    | 2.47    | -       | 2.06    | -        | -     | -    | 12.14 |
| 12 | 6.86   | -      | -      | 6.86   | -      | 6.87   | -      | 6.90   | -      | 1.36      | 1.36      | 1.86     | 1.79     | 1.87     | 2.22    | 2.47    | -       | 2.07    | -        | -     | -    | 12.14 |
| 13 | 6.86   | -      | -      | 6.87   | -      | 6.87   | -      | 6.90   | -      | 1.36      | 1.36      | 1.87     | 1.79     | 1.87     | 2.21    | 2.47    | -       | 2.06    | -        | -     | -    | 12.14 |
| 14 | 6.85   | -      | -      | 6.87   | -      | 6.86   | -      | 6.91   | -      | 1.36      | 1.36      | 1.87     | 1.79     | 1.87     | 2.21    | 2.48    | -       | 2.06    | -        | -     | -    | 12.14 |
| 15 | 6.85   | -      | -      | 6.87   | -      | 6.87   | -      | 6.90   | -      | 1.36      | 1.35      | 1.87     | 1.79     | 1.87     | 2.21    | 2.48    | -       | 2.06    | -        | -     | -    | 12.14 |
| 16 | 6.86   | -      | -      | 6.86   | -      | 6.87   | -      | 6.90   | -      | 1.36      | 1.36      | 1.87     | 1.79     | 1.87     | 2.21    | 2.47    | -       | 2.06    | -        | -     | -    | 12.14 |
| 17 | 6.85   | -      | -      | 6.86   | -      | 6.85   | -      | 6.89   | -      | 1.36      | 1.35      | 1.87     | 1.79     | 1.87     | 2.22    | 2.48    | -       | 2.06    | -        | -     | -    | 12.14 |
| 18 | 6.85   | -      | -      | 6.86   | -      | 6.87   | -      | 6.90   | -      | 1.36      | 1.35      | 1.87     | 1.79     | 1.87     | 2.21    | 2.48    | -       | 2.06    | -        | -     | -    | 12.14 |
| 19 | 6.85   | -      | -      | 6.85   | -      | 6.86   | -      | 6.88   | -      | 1.36      | 1.36      | 1.87     | 1.79     | 1.87     | 2.48    | 2.21    | -       | 2.06    | -        | -     | -    | 12.15 |
| 20 | 6.85   | -      | -      | 6.85   | -      | 6.87   | -      | 6.88   | -      | 1.37      | 1.36      | 1.87     | 1.79     | 1.87     | 2.47    | 2.21    | -       | 2.06    | -        | -     | -    | 12.16 |
| 21 | 6.85   | -      | -      | 6.85   | -      | 6.85   | -      | 6.89   | -      | 1.36      | 1.35      | 1.87     | 1.79     | 1.87     | 2.48    | 2.20    | -       | 2.06    | -        | -     | -    | 12.16 |
| 22 | 6.84   | -      | -      | 6.85   | -      | 6.86   | -      | 6.89   | -      | 1.36      | 1.36      | 1.87     | 1.79     | 1.87     | 2.21    | 2.47    | -       | 2.06    | -        | -     | -    | 12.17 |
| 23 | 6.85   | -      | -      | 6.86   | -      | 6.86   | -      | 6.90   | -      | 1.37      | 1.35      | 1.87     | 1.79     | 1.87     | 2.21    | 2.48    | -       | 2.06    | -        | -     | -    | 12.17 |
| 24 | 6.85   | -      | -      | 6.86   | -      | 6.88   | -      | 6.90   | -      | 1.37      | 1.35      | 1.87     | 1.79     | 1.87     | 2.21    | 2.47    | -       | 2.06    | -        | -     | -    | 12.16 |
| 25 | 6.85   | -      | -      | 6.87   | -      | 6.84   | -      | 6.90   | -      | 1.36      | 1.36      | 1.87     | 1.79     | 1.87     | 2.21    | 2.48    | -       | 2.05    | -        | -     | -    | 12.15 |
| 26 | 6.84   | -      | -      | 6.86   | -      | 6.88   | -      | 6.90   | -      | 1.37      | 1.35      | 1.87     | 1.79     | 1.87     | 2.48    | 2.21    | -       | 2.06    | -        | -     | -    | 12.14 |
| 27 | 6.85   | -      | -      | 6.86   | -      | 6.87   | -      | 6.91   | -      | 1.37      | 1.35      | 1.87     | 1.79     | 1.87     | 2.47    | 2.21    | -       | 2.06    | -        | -     | -    | 12.15 |

|    |      |      |   |      |      |      |      |      |   |      |      |      |      |      |      |      |   |      |   |   |   |       |
|----|------|------|---|------|------|------|------|------|---|------|------|------|------|------|------|------|---|------|---|---|---|-------|
| 28 | 6.84 | -    | - | 6.87 | -    | 6.88 | -    | 6.91 | - | 1.37 | 1.36 | 1.87 | 1.79 | 1.87 | 2.48 | 2.20 | - | 2.06 | - | - | - | 12.14 |
| 29 | 6.85 | -    | - | 6.86 | -    | 6.86 | -    | 6.90 | - | 1.37 | 1.36 | 1.87 | 1.79 | 1.87 | 2.47 | 2.20 | - | 2.06 | - | - | - | 12.14 |
| 30 | 6.85 | -    | - | 6.87 | -    | 6.87 | -    | 6.90 | - | 1.37 | 1.35 | 1.87 | 1.79 | 1.87 | 2.47 | 2.21 | - | 2.05 | - | - | - | 12.14 |
| 31 | 6.85 | -    | - | 6.87 | -    | 6.89 | -    | 6.91 | - | 1.36 | 1.36 | 1.87 | 1.79 | 1.87 | 2.48 | 2.20 | - | 2.06 | - | - | - | 12.14 |
| 32 | 6.85 | -    | - | 6.86 | -    | 6.88 | -    | 6.91 | - | 1.37 | 1.36 | 1.87 | 1.79 | 1.87 | 2.47 | 2.19 | - | 2.05 | - | - | - | 12.14 |
| 33 | 6.85 | -    | - | 6.87 | -    | 6.88 | -    | 6.91 | - | 1.38 | 1.36 | 1.87 | 1.79 | 1.88 | 2.47 | 2.19 | - | 2.05 | - | - | - | 12.14 |
| 34 | 6.85 | -    | - | 6.87 | -    | 6.88 | -    | 6.91 | - | 1.37 | 1.35 | 1.87 | 1.78 | 1.88 | 2.48 | 2.19 | - | 2.05 | - | - | - | 12.14 |
| 35 | 6.85 | -    | - | 6.87 | -    | 6.89 | -    | 6.91 | - | 1.37 | 1.35 | 1.87 | 1.79 | 1.87 | 2.48 | 2.19 | - | 2.05 | - | - | - | 12.14 |
| 36 | 6.84 | -    | - | 6.88 | -    | 6.89 | -    | 6.91 | - | 1.37 | 1.35 | 1.87 | 1.79 | 1.87 | 2.48 | 2.20 | - | 2.05 | - | - | - | 12.14 |
| 37 | 6.84 | -    | - | 6.88 | -    | 6.88 | -    | 6.91 | - | 1.37 | 1.36 | 1.87 | 1.79 | 1.87 | 2.48 | 2.19 | - | 2.05 | - | - | - | 12.14 |
| 38 | 6.84 | -    | - | 6.87 | -    | 6.89 | -    | 6.91 | - | 1.37 | 1.36 | 1.87 | 1.79 | 1.87 | 2.47 | 2.19 | - | 2.05 | - | - | - | 12.14 |
| 39 | 6.84 | -    | - | 6.88 | -    | 6.89 | -    | 6.90 | - | 1.38 | 1.36 | 1.87 | 1.79 | 1.87 | 2.47 | 2.19 | - | 2.05 | - | - | - | 12.14 |
| 40 | 6.84 | -    | - | 6.88 | -    | 6.89 | -    | 6.90 | - | 1.38 | 1.36 | 1.88 | 1.79 | 1.87 | 2.47 | 2.20 | - | 2.05 | - | - | - | 12.15 |
| 41 | 6.84 | -    | - | 6.87 | -    | 6.89 | -    | 6.90 | - | 1.37 | 1.36 | 1.88 | 1.79 | 1.87 | 2.47 | 2.20 | - | 2.05 | - | - | - | 12.15 |
| 42 | 6.84 | -    | - | 6.88 | -    | 6.89 | -    | 6.91 | - | 1.38 | 1.36 | 1.88 | 1.79 | 1.88 | 2.47 | 2.19 | - | 2.04 | - | - | - | 12.15 |
| 43 | 6.85 | -    | - | 6.88 | -    | 6.90 | -    | 6.91 | - | 1.38 | 1.36 | 1.87 | 1.79 | 1.87 | 2.47 | 2.18 | - | 2.04 | - | - | - | 12.15 |
| 44 | 6.84 | -    | - | 6.88 | -    | 6.89 | -    | 6.92 | - | 1.38 | 1.36 | 1.88 | 1.79 | 1.87 | 2.48 | 2.18 | - | 2.04 | - | - | - | 12.15 |
| 45 | 6.84 | -    | - | 6.88 | -    | 6.88 | -    | 6.92 | - | 1.39 | 1.36 | 1.88 | 1.79 | 1.87 | 2.48 | 2.18 | - | 2.04 | - | - | - | 12.15 |
| 46 | 6.83 | -    | - | 6.88 | -    | 6.89 | -    | 6.92 | - | 1.39 | 1.36 | 1.88 | 1.79 | 1.87 | 2.48 | 2.17 | - | 2.04 | - | - | - | 12.15 |
| 47 | 6.83 | -    | - | 6.89 | -    | 6.88 | -    | 6.91 | - | 1.39 | 1.35 | 1.88 | 1.79 | 1.87 | 2.47 | 2.17 | - | 2.04 | - | - | - | 12.15 |
| 48 | 6.84 | -    | - | 6.89 | -    | 6.88 | -    | 6.91 | - | 1.39 | 1.36 | 1.88 | 1.78 | 1.87 | 2.48 | 2.17 | - | 2.03 | - | - | - | 12.15 |
| 49 | 6.84 | -    | - | 6.88 | -    | 6.88 | -    | 6.92 | - | 1.39 | 1.36 | 1.88 | 1.78 | 1.87 | 2.48 | 2.16 | - | 2.03 | - | - | - | 12.16 |
| 50 | 6.83 | -    | - | 6.89 | -    | 6.89 | -    | 6.92 | - | 1.39 | 1.36 | 1.88 | 1.79 | 1.88 | 2.49 | 2.16 | - | 2.02 | - | - | - | 12.16 |
| 51 | 6.83 | -    | - | 6.89 | -    | 6.88 | -    | 6.92 | - | 1.40 | 1.36 | 1.88 | 1.79 | 1.87 | 2.49 | 2.14 | - | 2.02 | - | - | - | 12.16 |
| 52 | 6.83 | -    | - | 6.89 | -    | 6.90 | -    | 6.92 | - | 1.40 | 1.36 | 1.88 | 1.79 | 1.88 | 2.49 | 2.13 | - | 2.02 | - | - | - | 12.16 |
| 53 | 6.83 | -    | - | 6.89 | -    | 6.90 | -    | 6.92 | - | 1.40 | 1.36 | 1.88 | 1.79 | 1.87 | 2.49 | 2.12 | - | 2.01 | - | - | - | 12.16 |
| 54 | 6.82 | -    | - | 6.89 | -    | 6.90 | -    | 6.91 | - | 1.41 | 1.37 | 1.88 | 1.79 | 1.87 | 2.48 | 2.12 | - | 2.01 | - | - | - | 12.17 |
| 55 | 6.83 | -    | - | 6.89 | -    | 6.90 | -    | 6.92 | - | 1.41 | 1.37 | 1.88 | 1.79 | 1.87 | 2.49 | 2.12 | - | 2.00 | - | - | - | 12.17 |
| 56 | 6.83 | -    | - | 6.89 | -    | 6.90 | -    | 6.91 | - | 1.41 | 1.37 | 1.88 | 1.79 | 1.87 | 2.50 | 2.12 | - | 2.00 | - | - | - | 12.18 |
| 57 | 6.83 | -    | - | 6.89 | -    | 6.90 | -    | 6.91 | - | 1.42 | 1.37 | 1.89 | 1.79 | 1.88 | 2.51 | 2.10 | - | 1.99 | - | - | - | 12.18 |
| 58 | 3.30 | 3.53 | - | 6.89 | -    | 4.19 | 2.71 | 6.91 | - | 1.42 | 1.37 | 1.89 | 1.79 | 1.88 | 2.51 | 2.08 | - | 1.99 | - | - | - | 12.19 |
| 59 | 3.23 | 3.60 | - | 6.89 | -    | 4.07 | 2.83 | 6.91 | - | 1.42 | 1.37 | 1.89 | 1.79 | 1.88 | 2.52 | 2.07 | - | 1.98 | - | - | - | 12.19 |
| 60 | 3.27 | 3.56 | - | 4.13 | 2.75 | 4.00 | 2.91 | 6.91 | - | 1.42 | 1.37 | 1.89 | 1.79 | 1.88 | 2.52 | 2.04 | - | 1.97 | - | - | - | 12.2  |
| 61 | 3.29 | 3.54 | - | 4.04 | 2.85 | 3.95 | 2.95 | 6.91 | - | 1.43 | 1.37 | 1.89 | 1.79 | 1.88 | 2.53 | 2.02 | - | 1.97 | - | - | - | 12.2  |
| 62 | 3.33 | 3.51 | - | 3.99 | 2.90 | 3.88 | 3.02 | 6.90 | - | 1.44 | 1.37 | 1.89 | 1.79 | 1.88 | 2.54 | 2.01 | - | 1.96 | - | - | - | 12.2  |

|    |      |      |      |      |      |      |      |      |      |      |      |      |      |      |      |      |      |      |   |      |      |       |
|----|------|------|------|------|------|------|------|------|------|------|------|------|------|------|------|------|------|------|---|------|------|-------|
| 63 | 3.35 | 3.49 | -    | 3.97 | 2.91 | 3.87 | 3.04 | 6.91 | -    | 1.45 | 1.37 | 1.90 | 1.79 | 1.88 | 2.56 | 1.98 | -    | 1.95 | - | -    | -    | 12.21 |
| 64 | 3.38 | 3.47 | -    | 3.94 | 2.93 | 3.84 | 3.06 | 1.87 | 5.04 | 1.45 | 1.37 | 1.90 | 1.79 | 1.88 | 2.59 | 1.95 | -    | 1.94 | - | -    | -    | 12.21 |
| 65 | 3.41 | 3.44 | -    | 3.89 | 2.98 | 3.82 | 3.09 | 2.19 | 4.73 | 1.46 | 1.37 | 1.90 | 1.79 | 1.88 | 2.62 | 1.92 | -    | 1.93 | - | -    | -    | 12.22 |
| 66 | 3.42 | 3.43 | -    | 3.89 | 2.99 | 3.81 | 3.10 | 2.42 | 4.50 | 1.47 | 1.37 | 1.90 | 1.78 | 1.88 | 2.64 | 1.89 | -    | 1.91 | - | -    | -    | 12.22 |
| 67 | 3.43 | 3.42 | -    | 3.89 | 2.99 | 3.80 | 3.10 | 2.58 | 4.34 | 1.50 | 1.39 | 1.90 | 1.79 | 1.88 | 4.48 | -    | -    | 1.90 | - | -    | -    | 12.23 |
| 68 | 3.42 | 3.42 | -    | 3.90 | 2.99 | 3.80 | 3.10 | 2.72 | 4.19 | 1.51 | 1.39 | 1.90 | 1.78 | 1.88 | 4.46 | -    | -    | 1.88 | - | -    | -    | 12.24 |
| 69 | 3.43 | 3.41 | -    | 3.92 | 2.97 | 3.81 | 3.09 | 2.84 | 4.08 | 1.52 | 1.39 | 1.90 | 1.79 | 1.88 | 4.44 | -    | -    | 1.86 | - | -    | -    | 12.25 |
| 70 | 3.43 | 3.42 | -    | 3.93 | 2.97 | 3.83 | 3.08 | 2.91 | 4.00 | 1.54 | 1.39 | 1.91 | 1.79 | 1.88 | 4.43 | -    | -    | 1.84 | - | -    | -    | 12.27 |
| 71 | 3.44 | 3.41 | -    | 3.95 | 2.96 | 3.85 | 3.06 | 2.98 | 3.94 | 1.55 | 1.39 | 1.91 | 1.78 | 1.88 | 4.40 | -    | -    | 1.80 | - | -    | -    | 12.28 |
| 72 | 3.43 | 3.42 | -    | 3.96 | 2.96 | 3.86 | 3.06 | 3.03 | 3.91 | 1.57 | 1.39 | 1.93 | 1.78 | 1.88 | 4.39 | -    | -    | 1.75 | - | -    | -    | 12.3  |
| 73 | 3.34 | 3.25 | 0.24 | 2.97 | 3.94 | 3.86 | 3.07 | 3.07 | 3.88 | 1.61 | 1.41 | 1.94 | 1.78 | 1.88 | 4.34 | -    | -    | 1.70 | - | -    | -    | 12.33 |
| 74 | 3.26 | 3.16 | 0.39 | 3.00 | 3.92 | 3.85 | 3.08 | 3.09 | 3.87 | 1.63 | 1.41 | 1.95 | 1.78 | 1.88 | 4.31 | -    | -    | 1.64 | - | -    | -    | 12.36 |
| 75 | 3.20 | 3.06 | 0.53 | 3.90 | 3.03 | 3.10 | 3.85 | 3.87 | 3.09 | 1.65 | 1.41 | 1.97 | 1.78 | 1.88 | 4.28 | -    | -    | -    | - | 0.82 | 0.75 | 12.42 |
| 76 | 3.17 | 2.94 | 0.65 | 3.87 | 3.07 | 3.13 | 3.82 | 3.88 | 3.08 | 1.68 | 1.42 | 1.99 | 1.78 | 1.88 | 4.24 | -    | -    | -    | - | 0.78 | 0.74 | 12.46 |
| 77 | 3.19 | 2.84 | -    | 3.84 | 3.10 | 3.79 | 3.16 | 3.07 | 3.90 | 1.71 | 1.42 | 2.01 | 1.78 | 1.88 | 4.21 | -    | 1.45 | -    | - | 0.72 | -    | 12.49 |
| 78 | 5.95 | -    | -    | 3.81 | 3.13 | 3.77 | 3.17 | 3.07 | 3.91 | 1.74 | 1.42 | 2.03 | 1.78 | 1.89 | 4.17 | -    | 1.52 | -    | - | 0.66 | -    | 12.52 |
| 79 | 3.14 | 2.78 | -    | 3.79 | 3.15 | 3.75 | 3.20 | 3.90 | 3.08 | 1.77 | 1.42 | 2.05 | 1.78 | 1.89 | 4.14 | -    | 1.55 | -    | - | 0.60 | -    | 12.54 |
| 80 | 3.11 | 2.78 | -    | 3.78 | 3.17 | 3.74 | 3.21 | 3.91 | 3.08 | 1.80 | 1.43 | 2.06 | 1.77 | 1.89 | 4.11 | -    | 1.59 | -    | - | 0.55 | -    | 12.56 |
| 81 | 3.08 | 2.80 | -    | 3.77 | 3.18 | 3.74 | 3.22 | 3.92 | 3.06 | 1.82 | 1.43 | 2.07 | 1.78 | 1.89 | 4.10 | -    | 1.60 | -    | - | 0.51 | -    | 12.57 |
| 82 | 3.04 | 2.82 | -    | 3.75 | 3.19 | 3.73 | 3.23 | 3.93 | 3.05 | 1.84 | 1.42 | 2.09 | 1.78 | 1.89 | 4.08 | -    | 1.62 | -    | - | 0.47 | -    | 12.59 |
| 83 | 3.01 | 2.83 | -    | 3.21 | 3.74 | 3.72 | 3.25 | 3.03 | 3.94 | 1.86 | 1.42 | 2.09 | 1.78 | 1.89 | 4.07 | -    | 1.64 | -    | - | 0.43 | -    | 12.6  |
| 84 | 3.01 | 2.84 | -    | 3.22 | 3.73 | 3.70 | 3.26 | 3.03 | 3.92 | 1.87 | 1.42 | 2.10 | 1.78 | 1.89 | 4.06 | -    | 1.64 | -    | - | 0.41 | -    | 12.61 |
| 85 | 2.99 | 2.85 | -    | 3.72 | 3.23 | 3.70 | 3.26 | 3.02 | 3.96 | 1.88 | 1.42 | 2.11 | 1.78 | 1.89 | 4.05 | -    | 1.65 | -    | - | 0.38 | -    | 12.62 |
| 86 | 2.96 | 2.86 | -    | 3.72 | 3.24 | 3.70 | 3.26 | 3.02 | 3.98 | 1.90 | 1.42 | 2.12 | 1.78 | 1.89 | 4.04 | -    | 1.67 | -    | - | 0.36 | -    | 12.63 |
| 87 | 2.95 | 2.86 | -    | 3.71 | 3.25 | 3.69 | 3.27 | 3.01 | 3.98 | 1.91 | 1.42 | 2.13 | 1.78 | 1.89 | 4.03 | -    | 1.67 | -    | - | 0.34 | -    | 12.63 |
| 88 | 2.93 | 2.87 | -    | 3.24 | 3.70 | 3.69 | 3.27 | 3.99 | 2.99 | 1.92 | 1.43 | 2.13 | 1.78 | 1.89 | 4.02 | -    | 1.68 | -    | - | 0.32 | -    | 12.64 |
| 89 | 2.92 | 2.87 | -    | 3.25 | 3.70 | 3.68 | 3.28 | 4.02 | 2.97 | 1.93 | 1.42 | 2.14 | 1.78 | 1.89 | 4.01 | -    | 1.70 | -    | - | 0.30 | -    | 12.65 |
| 90 | 2.93 | 2.86 | -    | 3.70 | 3.26 | 3.68 | 3.29 | 2.95 | 4.03 | 1.94 | 1.43 | 2.14 | 1.78 | 1.89 | 4.01 | -    | 1.70 | -    | - | 0.29 | -    | 12.65 |
| 91 | 2.92 | 2.86 | -    | 3.70 | 3.26 | 3.68 | 3.29 | 2.93 | 4.06 | 1.95 | 1.43 | 2.15 | 1.78 | 1.89 | 4.00 | -    | 1.71 | -    | - | 0.27 | -    | 12.66 |
| 92 | 2.90 | 2.88 | -    | 3.70 | 3.26 | 3.68 | 3.30 | 2.90 | 4.09 | 1.95 | 1.43 | 2.15 | 1.78 | 1.89 | 4.00 | -    | 1.71 | -    | - | 0.26 | -    | 12.66 |
| 93 | 2.87 | 2.90 | -    | 3.69 | 3.27 | 3.67 | 3.30 | 2.87 | 4.12 | 1.96 | 1.42 | 2.16 | 1.78 | 1.89 | 4.00 | -    | 1.72 | -    | - | 0.25 | -    | 12.66 |
| 94 | 2.86 | 2.91 | -    | 3.69 | 3.27 | 3.67 | 3.30 | 2.85 | 4.14 | 1.96 | 1.42 | 2.16 | 1.78 | 1.89 | 4.00 | -    | 1.72 | -    | - | 0.24 | -    | 12.67 |
| 95 | 2.86 | 2.91 | -    | 3.68 | 3.27 | 3.67 | 3.30 | 2.82 | 4.17 | 1.97 | 1.43 | 2.16 | 1.78 | 1.89 | 3.99 | -    | 1.72 | -    | - | 0.23 | -    | 12.67 |
| 96 | 2.83 | 2.92 | -    | 3.68 | 3.28 | 3.66 | 3.31 | 2.78 | 4.22 | 1.97 | 1.43 | 2.16 | 1.78 | 1.89 | 3.99 | -    | 1.73 | -    | - | 0.23 | -    | 12.68 |
| 97 | 2.83 | 2.92 | -    | 3.68 | 3.27 | 3.65 | 3.31 | 2.72 | 4.27 | 1.97 | 1.43 | 2.16 | 1.78 | 1.89 | 3.99 | -    | 1.74 | -    | - | 0.23 | -    | 12.68 |

|     |      |      |   |      |      |      |      |      |      |      |      |      |      |      |      |   |      |   |   |      |   |       |
|-----|------|------|---|------|------|------|------|------|------|------|------|------|------|------|------|---|------|---|---|------|---|-------|
| 98  | 2.82 | 2.93 | - | 3.67 | 3.29 | 3.65 | 3.32 | 2.69 | 4.29 | 1.97 | 1.42 | 2.16 | 1.78 | 1.89 | 4.00 | - | 1.74 | - | - | -    | - | 12.69 |
| 99  | 2.81 | 2.94 | - | 3.29 | 3.67 | 3.65 | 3.32 | 4.34 | 2.65 | 1.97 | 1.42 | 2.16 | 1.78 | 1.89 | 4.00 | - | 1.75 | - | - | -    | - | 12.69 |
| 100 | 2.79 | 2.94 | - | 3.28 | 3.67 | 3.65 | 3.31 | 4.39 | 2.60 | 1.98 | 1.42 | 2.16 | 1.78 | 1.89 | 4.00 | - | 1.75 | - | - | -    | - | 12.69 |
| 101 | 2.79 | 2.94 | - | 3.29 | 3.66 | 3.65 | 3.31 | 4.42 | 2.56 | 1.98 | 1.42 | 2.16 | 1.78 | 1.89 | 4.00 | - | 1.76 | - | - | -    | - | 12.69 |
| 102 | 2.78 | 2.96 | - | 3.29 | 3.66 | 3.65 | 3.31 | 4.46 | 2.51 | 1.98 | 1.42 | 2.16 | 1.78 | 1.89 | 4.01 | - | 1.76 | - | - | -    | - | 12.7  |
| 103 | 2.76 | 2.96 | - | 3.30 | 3.66 | 3.65 | 3.31 | 4.51 | 2.47 | 1.97 | 1.42 | 2.16 | 1.77 | 1.89 | 4.01 | - | 1.76 | - | - | -    | - | 12.7  |
| 104 | 2.76 | 2.95 | - | 3.29 | 3.67 | 3.65 | 3.31 | 4.56 | 2.42 | 1.97 | 1.42 | 2.16 | 1.77 | 1.89 | 4.01 | - | 1.77 | - | - | -    | - | 12.7  |
| 105 | 2.74 | 2.97 | - | 3.28 | 3.67 | 3.65 | 3.31 | 4.60 | 2.36 | 1.97 | 1.42 | 2.16 | 1.77 | 1.89 | 4.02 | - | 1.77 | - | - | -    | - | 12.7  |
| 106 | 2.73 | 2.97 | - | 3.28 | 3.68 | 3.65 | 3.31 | 4.67 | 2.30 | 1.98 | 1.42 | 2.16 | 1.77 | 1.89 | 4.01 | - | 1.78 | - | - | -    | - | 12.71 |
| 107 | 2.72 | 2.99 | - | 3.27 | 3.67 | 3.65 | 3.31 | 4.71 | 2.26 | 1.97 | 1.42 | 2.16 | 1.78 | 1.89 | 4.02 | - | 1.78 | - | - | -    | - | 12.71 |
| 108 | 2.71 | 2.99 | - | 3.27 | 3.67 | 3.66 | 3.31 | 4.76 | 2.22 | 1.97 | 1.42 | 2.16 | 1.78 | 1.89 | 4.02 | - | 1.78 | - | - | -    | - | 12.71 |
| 109 | 2.72 | 2.98 | - | 3.27 | 3.68 | 3.65 | 3.31 | 4.81 | 2.16 | 1.97 | 1.42 | 2.16 | 1.78 | 1.89 | 4.03 | - | 1.79 | - | - | -    | - | 12.72 |
| 110 | 2.68 | 3.02 | - | 3.27 | 3.69 | 3.66 | 3.31 | 4.88 | 2.10 | 1.98 | 1.42 | 2.16 | 1.78 | 1.89 | 4.03 | - | 1.78 | - | - | -    | - | 12.72 |
| 111 | 2.66 | 3.03 | - | 3.28 | 3.67 | 3.66 | 3.31 | 4.93 | 2.04 | 1.99 | 1.42 | 2.16 | 1.78 | 1.89 | 4.02 | - | 1.79 | - | - | -    | - | 12.72 |
| 112 | 2.64 | 3.04 | - | 3.27 | 3.69 | 3.66 | 3.31 | 4.96 | 2.00 | 1.98 | 1.41 | 2.16 | 1.78 | 1.89 | 4.02 | - | 1.80 | - | - | -    | - | 12.72 |
| 113 | 2.67 | 3.01 | - | 3.69 | 3.27 | 3.67 | 3.31 | 1.93 | 5.03 | 1.99 | 1.41 | 2.16 | 1.78 | 1.89 | 4.02 | - | 1.79 | - | - | -    | - | 12.73 |
| 114 | 2.65 | 3.03 | - | 3.69 | 3.27 | 3.66 | 3.31 | 1.88 | 5.09 | 1.98 | 1.40 | 2.16 | 1.78 | 1.89 | 4.03 | - | 1.80 | - | - | -    | - | 12.73 |
| 115 | 2.61 | 3.06 | - | 3.69 | 3.27 | 3.66 | 3.32 | 1.82 | 5.14 | 1.98 | 1.40 | 2.16 | 1.78 | 1.89 | 4.03 | - | 1.80 | - | - | -    | - | 12.73 |
| 116 | 2.58 | 3.09 | - | 3.25 | 3.71 | 3.65 | 3.31 | 1.75 | 5.19 | 1.98 | 1.40 | 2.16 | 1.78 | 1.89 | 4.04 | - | 1.80 | - | - | -    | - | 12.73 |
| 117 | 2.62 | 3.07 | - | 3.24 | 3.71 | 3.66 | 3.31 | 1.70 | 5.23 | 1.97 | 1.40 | 2.16 | 1.78 | 1.89 | 4.03 | - | 1.80 | - | - | -    | - | 12.73 |
| 118 | 2.59 | 3.09 | - | 3.69 | 3.26 | 3.65 | 3.32 | 1.64 | 5.30 | 1.98 | 1.40 | 2.16 | 1.78 | 1.89 | 4.04 | - | 1.81 | - | - | -    | - | 12.74 |
| 119 | 2.56 | 3.11 | - | 3.68 | 3.26 | 3.66 | 3.31 | 1.59 | 5.37 | 1.98 | 1.40 | 2.16 | 1.78 | 1.89 | 4.03 | - | 1.81 | - | - | -    | - | 12.74 |
| 120 | 2.59 | 3.07 | - | 3.24 | 3.70 | 3.65 | 3.31 | 1.53 | 5.43 | 1.97 | 1.40 | 2.16 | 1.78 | 1.89 | 4.04 | - | 1.81 | - | - | -    | - | 12.74 |
| 121 | 5.65 | -    | - | 3.26 | 3.69 | 3.66 | 3.31 | 1.46 | 5.50 | 1.97 | 1.40 | 2.16 | 1.78 | 1.89 | 4.05 | - | 1.81 | - | - | -    | - | 12.74 |
| 122 | 5.64 | -    | - | 3.26 | 3.69 | 3.66 | 3.31 | 5.54 | 1.42 | 1.97 | 1.40 | 2.15 | 1.78 | 1.88 | 4.06 | - | 1.82 | - | - | 0.18 | - | 12.75 |
| 123 | 5.64 | -    | - | 3.25 | 3.71 | 3.66 | 3.30 | 5.60 | 1.35 | 1.96 | 1.41 | 2.15 | 1.78 | 1.88 | 4.07 | - | 1.82 | - | - | 0.18 | - | 12.75 |
| 124 | 5.64 | -    | - | 3.24 | 3.71 | 3.66 | 3.29 | 5.65 | 1.29 | 1.96 | 1.40 | 2.15 | 1.78 | 1.88 | 4.07 | - | 1.83 | - | - | 0.18 | - | 12.75 |
| 125 | 5.64 | -    | - | 3.23 | 3.72 | 3.66 | 3.30 | 5.70 | 1.24 | 1.95 | 1.40 | 2.14 | 1.78 | 1.88 | 4.09 | - | 1.83 | - | - | 0.18 | - | 12.75 |
| 126 | 5.64 | -    | - | 3.23 | 3.72 | 3.67 | 3.30 | 5.76 | 1.18 | 1.95 | 1.39 | 2.14 | 1.78 | 1.88 | 4.10 | - | 1.83 | - | - | 0.18 | - | 12.76 |
| 127 | 5.64 | -    | - | 3.23 | 3.72 | 3.67 | 3.29 | 5.81 | 1.13 | 1.95 | 1.39 | 2.14 | 1.78 | 1.89 | 4.11 | - | 1.83 | - | - | 0.18 | - | 12.76 |
| 128 | 5.63 | -    | - | 3.72 | 3.24 | 3.30 | 3.67 | 1.07 | 5.86 | 1.94 | 1.39 | 2.14 | 1.77 | 1.89 | 4.12 | - | 1.83 | - | - | 0.19 | - | 12.76 |
| 129 | 5.62 | -    | - | 3.24 | 3.72 | 3.67 | 3.30 | 5.90 | 1.02 | 1.94 | 1.39 | 2.14 | 1.78 | 1.89 | 4.12 | - | 1.83 | - | - | 0.19 | - | 12.76 |
| 130 | 5.62 | -    | - | 3.22 | 3.73 | 3.67 | 3.30 | 5.95 | 0.96 | 1.93 | 1.39 | 2.13 | 1.78 | 1.89 | 4.14 | - | 1.83 | - | - | 0.20 | - | 12.77 |
| 131 | 5.62 | -    | - | 3.23 | 3.73 | 3.68 | 3.29 | 6.00 | 0.93 | 1.93 | 1.38 | 2.13 | 1.77 | 1.88 | 4.14 | - | 1.84 | - | - | 0.20 | - | 12.77 |
| 132 | 5.62 | -    | - | 3.21 | 3.74 | 3.67 | 3.29 | 6.06 | 0.87 | 1.92 | 1.38 | 2.13 | 1.77 | 1.89 | 4.15 | - | 1.84 | - | - | 0.21 | - | 12.77 |

|     |      |   |   |      |      |      |      |      |      |      |      |      |      |      |      |      |      |   |      |      |   |       |
|-----|------|---|---|------|------|------|------|------|------|------|------|------|------|------|------|------|------|---|------|------|---|-------|
| 133 | 5.60 | - | - | 3.74 | 3.21 | 3.67 | 3.29 | 0.83 | 6.10 | 1.91 | 1.38 | 2.12 | 1.77 | 1.89 | 4.16 | -    | 1.85 | - | -    | 0.21 | - | 12.77 |
| 134 | 5.60 | - | - | 3.23 | 3.74 | 3.29 | 3.67 | 6.14 | 0.78 | 1.91 | 1.38 | 2.12 | 1.78 | 1.89 | 4.16 | -    | 1.85 | - | -    | 0.21 | - | 12.78 |
| 135 | 5.60 | - | - | 3.21 | 3.75 | 3.28 | 3.68 | 6.17 | 0.74 | 1.90 | 1.38 | 2.11 | 1.78 | 1.89 | 4.18 | -    | 1.85 | - | -    | 0.22 | - | 12.78 |
| 136 | 5.61 | - | - | 3.75 | 3.20 | 3.68 | 3.27 | 0.71 | 6.21 | 1.90 | 1.37 | 2.11 | 1.77 | 1.89 | 4.19 | -    | 1.85 | - | -    | 0.23 | - | 12.78 |
| 137 | 5.60 | - | - | 3.75 | 3.20 | 3.68 | 3.28 | 0.67 | 6.22 | 1.89 | 1.37 | 2.10 | 1.78 | 1.89 | 4.20 | -    | 1.85 | - | -    | 0.23 | - | 12.79 |
| 138 | 5.60 | - | - | 3.76 | 3.20 | 3.68 | 3.27 | 0.65 | 6.25 | 1.88 | 1.37 | 2.10 | 1.78 | 1.89 | 4.21 | -    | 1.85 | - | -    | 0.24 | - | 12.79 |
| 139 | 5.61 | - | - | 3.18 | 3.77 | 3.69 | 3.28 | 6.26 | 0.64 | 1.87 | 1.37 | 2.09 | 1.78 | 1.89 | 4.22 | -    | 1.85 | - | -    | 0.24 | - | 12.79 |
| 140 | 5.60 | - | - | 3.17 | 3.78 | 3.69 | 3.28 | 6.27 | 0.63 | 1.87 | 1.37 | 2.09 | 1.78 | 1.89 | 4.23 | -    | 1.85 | - | -    | 0.25 | - | 12.79 |
| 141 | 5.59 | - | - | 3.77 | 3.17 | 3.69 | 3.27 | 0.61 | 6.29 | 1.85 | 1.36 | 2.09 | 1.78 | 1.89 | 4.25 | -    | 1.85 | - | -    | 0.25 | - | 12.79 |
| 142 | 5.59 | - | - | 3.77 | 3.17 | 3.70 | 3.26 | 0.59 | 6.31 | 1.84 | 1.36 | 2.09 | 1.78 | 1.88 | 4.27 | -    | 1.84 | - | -    | 0.26 | - | 12.79 |
| 143 | 5.58 | - | - | 3.78 | 3.16 | 3.70 | 3.25 | 0.58 | 6.32 | 1.84 | 1.35 | 2.08 | 1.78 | 1.88 | 4.28 | -    | 1.85 | - | -    | 0.27 | - | 12.8  |
| 144 | 5.59 | - | - | 3.78 | 3.16 | 3.71 | 3.25 | 0.56 | 6.33 | 1.83 | 1.35 | 2.08 | 1.78 | 1.88 | 4.29 | -    | 1.85 | - | -    | 0.27 | - | 12.8  |
| 145 | 5.58 | - | - | 3.80 | 3.15 | 3.71 | 3.24 | 0.55 | 6.34 | 1.82 | 1.35 | 2.07 | 1.78 | 1.88 | 4.30 | -    | 1.86 | - | -    | 0.28 | - | 12.8  |
| 146 | 5.58 | - | - | 3.81 | 3.14 | 3.71 | 3.24 | 0.55 | 6.34 | 1.81 | 1.35 | 2.07 | 1.78 | 1.88 | 4.31 | -    | 1.86 | - | -    | 0.28 | - | 12.81 |
| 147 | 5.58 | - | - | 3.82 | 3.13 | 3.72 | 3.24 | 0.54 | 6.35 | 1.79 | 1.34 | 2.06 | 1.78 | 1.88 | 4.33 | -    | 1.86 | - | -    | 0.29 | - | 12.81 |
| 148 | 5.57 | - | - | 3.82 | 3.12 | 3.72 | 3.23 | 0.54 | 6.35 | 1.78 | 1.34 | 2.06 | 1.78 | 1.89 | 4.35 | -    | 1.86 | - | -    | 0.30 | - | 12.81 |
| 149 | 5.57 | - | - | 3.11 | 3.84 | 3.72 | 3.23 | 6.34 | 0.54 | 1.77 | 1.34 | 2.06 | 1.78 | 1.88 | 4.36 | -    | 1.85 | - | -    | 0.30 | - | 12.81 |
| 150 | 5.58 | - | - | 3.12 | 3.82 | 3.73 | 3.22 | 6.34 | 0.54 | 1.76 | 1.34 | 2.06 | 1.78 | 1.88 | 4.38 | -    | 1.85 | - | -    | 0.31 | - | 12.81 |
| 151 | 5.27 | - | - | 3.13 | 3.81 | 3.74 | 3.21 | 6.33 | 0.55 | 1.75 | 1.34 | 2.05 | 1.78 | 1.88 | 4.40 | -    | 1.85 | - | -    | 0.32 | - | 12.82 |
| 152 | 5.59 | - | - | 3.13 | 3.81 | 3.76 | 3.20 | 6.31 | 0.58 | 1.75 | 1.33 | 2.05 | 1.78 | 1.88 | 4.41 | -    | 1.86 | - | -    | 0.26 | - | 12.82 |
| 153 | 5.59 | - | - | 6.93 | -    | 3.76 | 3.19 | 6.34 | 0.59 | 1.74 | 1.33 | 2.04 | 1.78 | 1.88 | 4.42 | -    | 1.86 | - | -    | 0.25 | - | 12.82 |
| 154 | 5.58 | - | - | 6.93 | -    | 3.77 | 3.16 | 6.34 | 0.60 | 1.72 | 1.34 | 2.04 | 1.78 | 1.88 | 4.43 | -    | 1.86 | - | -    | 0.24 | - | 12.82 |
| 155 | 5.58 | - | - | 6.93 | -    | 3.17 | 3.78 | 6.32 | 0.64 | 1.71 | 1.33 | 2.04 | 1.78 | 1.88 | 4.44 | -    | 1.86 | - | -    | 0.22 | - | 12.83 |
| 156 | 5.60 | - | - | 6.93 | -    | 3.16 | 3.79 | 6.30 | 0.66 | 1.71 | 1.33 | 2.03 | 1.78 | 1.88 | 4.45 | -    | 1.85 | - | -    | 0.21 | - | 12.82 |
| 157 | 5.58 | - | - | 6.93 | -    | 3.16 | 3.79 | 6.29 | 0.71 | 1.70 | 1.33 | 2.03 | 1.78 | 1.88 | 4.46 | -    | 1.85 | - | -    | 0.18 | - | 12.83 |
| 158 | 5.58 | - | - | 6.93 | -    | 3.15 | 3.79 | 6.24 | -    | 1.68 | 1.33 | 2.02 | 1.78 | 1.88 | 4.48 | -    | 1.86 | - | 0.97 | -    | - | 12.83 |
| 159 | 5.58 | - | - | 6.93 | -    | 3.14 | 3.80 | 6.22 | -    | 1.67 | 1.33 | 2.02 | 1.78 | 1.88 | 4.49 | -    | 1.86 | - | 0.99 | -    | - | 12.83 |
| 160 | 5.58 | - | - | 6.92 | -    | 3.14 | 3.80 | 6.21 | -    | 1.64 | 1.31 | 2.01 | 1.78 | 1.88 | 2.76 | 1.77 | 1.86 | - | 1.01 | -    | - | 12.83 |
| 161 | 5.57 | - | - | 6.91 | -    | 3.81 | 3.13 | 6.21 | -    | 1.63 | 1.31 | 2.01 | 1.78 | 1.88 | 2.74 | 1.80 | 1.86 | - | 1.03 | -    | - | 12.84 |
| 162 | 5.57 | - | - | 6.92 | -    | 3.82 | 3.12 | 6.19 | -    | 1.62 | 1.31 | 2.00 | 1.78 | 1.87 | 2.70 | 1.86 | 1.86 | - | 1.05 | -    | - | 12.84 |
| 163 | 5.56 | - | - | 6.92 | -    | 3.82 | 3.11 | 6.19 | -    | 1.61 | 1.31 | 2.00 | 1.78 | 1.88 | 2.67 | 1.90 | 1.86 | - | 1.07 | -    | - | 12.84 |
| 164 | 5.56 | - | - | 6.91 | -    | 3.82 | 3.12 | 6.16 | -    | 1.60 | 1.31 | 1.99 | 1.78 | 1.88 | 2.64 | 1.94 | 1.86 | - | 1.09 | -    | - | 12.84 |
| 165 | 5.56 | - | - | 6.92 | -    | 3.82 | 3.12 | 6.13 | -    | 1.58 | 1.31 | 1.99 | 1.78 | 1.87 | 2.62 | 1.98 | 1.86 | - | 1.12 | -    | - | 12.84 |
| 166 | 5.56 | - | - | 6.92 | -    | 3.83 | 3.11 | 6.11 | -    | 1.57 | 1.31 | 1.99 | 1.78 | 1.88 | 2.61 | 2.01 | 1.86 | - | 1.14 | -    | - | 12.84 |
| 167 | 5.56 | - | - | 6.92 | -    | 3.83 | 3.10 | 6.09 | -    | 1.56 | 1.31 | 1.98 | 1.78 | 1.87 | 2.60 | 2.04 | 1.86 | - | 1.17 | -    | - | 12.84 |

|     |      |   |   |      |      |      |      |      |   |      |      |      |      |      |      |      |      |   |      |   |   |       |
|-----|------|---|---|------|------|------|------|------|---|------|------|------|------|------|------|------|------|---|------|---|---|-------|
| 168 | 5.55 | - | - | 6.91 | -    | 6.92 | -    | 6.07 | - | 1.55 | 1.31 | 1.98 | 1.78 | 1.87 | 2.58 | 2.07 | 1.87 | - | 1.20 | - | - | 12.85 |
| 169 | 5.55 | - | - | 6.91 | -    | 6.92 | -    | 6.05 | - | 1.53 | 1.30 | 1.98 | 1.78 | 1.87 | 2.57 | 2.09 | 1.87 | - | 1.22 | - | - | 12.85 |
| 170 | 5.54 | - | - | 6.92 | -    | 6.92 | -    | 6.03 | - | 1.52 | 1.30 | 1.97 | 1.78 | 1.87 | 2.56 | 2.11 | 1.87 | - | 1.24 | - | - | 12.85 |
| 171 | 5.55 | - | - | 6.91 | -    | 6.92 | -    | 6.01 | - | 1.51 | 1.31 | 1.97 | 1.78 | 1.87 | 2.55 | 2.13 | 1.87 | - | 1.28 | - | - | 12.85 |
| 172 | 5.55 | - | - | 6.91 | -    | 6.93 | -    | 5.99 | - | 1.50 | 1.30 | 1.97 | 1.78 | 1.87 | 2.55 | 2.15 | 1.86 | - | 1.30 | - | - | 12.85 |
| 173 | 5.55 | - | - | 6.91 | -    | 6.92 | -    | 5.97 | - | 1.49 | 1.30 | 1.96 | 1.78 | 1.87 | 2.54 | 2.16 | 1.86 | - | 1.33 | - | - | 12.85 |
| 174 | 5.54 | - | - | 6.91 | -    | 6.92 | -    | 5.96 | - | 1.49 | 1.30 | 1.96 | 1.79 | 1.87 | 2.54 | 2.17 | 1.87 | - | 1.34 | - | - | 12.85 |
| 175 | 5.55 | - | - | 6.91 | -    | 6.92 | -    | 5.94 | - | 1.49 | 1.31 | 1.95 | 1.79 | 1.87 | 2.53 | 2.17 | 1.87 | - | 1.37 | - | - | 12.85 |
| 176 | 5.54 | - | - | 6.91 | -    | 3.84 | 3.08 | 5.92 | - | 1.48 | 1.31 | 1.95 | 1.79 | 1.87 | 2.53 | 2.18 | 1.88 | - | 1.38 | - | - | 12.84 |
| 177 | 5.55 | - | - | 6.91 | -    | 3.83 | 3.09 | 5.91 | - | 1.48 | 1.31 | 1.95 | 1.79 | 1.87 | 2.52 | 2.19 | 1.87 | - | 1.39 | - | - | 12.84 |
| 178 | 5.55 | - | - | 6.92 | -    | 3.83 | 3.09 | 5.90 | - | 1.48 | 1.31 | 1.95 | 1.79 | 1.87 | 2.53 | 2.19 | 1.86 | - | 1.40 | - | - | 12.84 |
| 179 | 5.55 | - | - | 6.92 | -    | 3.82 | 3.10 | 5.89 | - | 1.48 | 1.31 | 1.95 | 1.79 | 1.87 | 2.53 | 2.19 | 1.86 | - | 1.41 | - | - | 12.84 |
| 180 | 5.54 | - | - | 6.92 | -    | 3.78 | 3.14 | 5.89 | - | 1.47 | 1.30 | 1.95 | 1.79 | 1.87 | 2.53 | 2.20 | 1.87 | - | 1.42 | - | - | 12.83 |
| 181 | 5.55 | - | - | 6.92 | -    | 3.77 | 3.16 | 5.88 | - | 1.47 | 1.31 | 1.95 | 1.79 | 1.87 | 2.52 | 2.21 | 1.87 | - | 1.42 | - | - | 12.83 |
| 182 | 5.55 | - | - | 6.93 | -    | 3.74 | 3.19 | 5.88 | - | 1.47 | 1.31 | 1.95 | 1.79 | 1.87 | 2.52 | 2.21 | 1.86 | - | 1.43 | - | - | 12.83 |
| 183 | 5.56 | - | - | 3.83 | 3.09 | 3.72 | 3.21 | 5.88 | - | 1.48 | 1.30 | 1.94 | 1.79 | 1.87 | 2.51 | 2.21 | 1.86 | - | 1.43 | - | - | 12.83 |
| 184 | 5.56 | - | - | 3.83 | 3.09 | 3.68 | 3.24 | 5.88 | - | 1.48 | 1.30 | 1.95 | 1.79 | 1.87 | 2.51 | 2.21 | 1.86 | - | 1.43 | - | - | 12.83 |
| 185 | 5.56 | - | - | 3.79 | 3.13 | 3.67 | 3.26 | 5.87 | - | 1.48 | 1.30 | 1.95 | 1.79 | 1.87 | 2.51 | 2.21 | 1.86 | - | 1.44 | - | - | 12.82 |
| 186 | 5.57 | - | - | 3.76 | 3.17 | 3.63 | 3.30 | 5.87 | - | 1.48 | 1.30 | 1.95 | 1.79 | 1.87 | 2.51 | 2.21 | 1.86 | - | 1.44 | - | - | 12.82 |
| 187 | 5.58 | - | - | 3.73 | 3.20 | 3.59 | 3.34 | 5.86 | - | 1.48 | 1.30 | 1.94 | 1.79 | 1.87 | 2.51 | 2.21 | 1.86 | - | 1.45 | - | - | 12.82 |
| 188 | 5.57 | - | - | 3.69 | 3.23 | 3.58 | 3.34 | 5.87 | - | 1.48 | 1.30 | 1.95 | 1.79 | 1.87 | 2.51 | 2.21 | 1.85 | - | 1.45 | - | - | 12.82 |
| 189 | 5.57 | - | - | 3.66 | 3.26 | 3.55 | 3.37 | 5.87 | - | 1.48 | 1.30 | 1.95 | 1.79 | 1.87 | 2.52 | 2.21 | 1.85 | - | 1.45 | - | - | 12.82 |
| 190 | 5.56 | - | - | 3.63 | 3.30 | 3.53 | 3.40 | 5.87 | - | 1.48 | 1.30 | 1.95 | 1.79 | 1.87 | 2.51 | 2.22 | 1.86 | - | 1.45 | - | - | 12.82 |
| 191 | 5.57 | - | - | 3.60 | 3.32 | 3.51 | 3.43 | 5.86 | - | 1.48 | 1.31 | 1.95 | 1.79 | 1.87 | 2.50 | 2.22 | 1.86 | - | 1.45 | - | - | 12.81 |
| 192 | 5.58 | - | - | 3.57 | 3.36 | 3.49 | 3.44 | 5.86 | - | 1.48 | 1.30 | 1.95 | 1.79 | 1.87 | 2.50 | 2.21 | 1.86 | - | 1.45 | - | - | 12.81 |
| 193 | 5.59 | - | - | 3.55 | 3.38 | 3.46 | 3.46 | 5.85 | - | 1.48 | 1.30 | 1.95 | 1.79 | 1.87 | 2.51 | 2.21 | 1.85 | - | 1.45 | - | - | 12.81 |
| 194 | 5.58 | - | - | 3.51 | 3.41 | 3.44 | 3.48 | 5.86 | - | 1.47 | 1.31 | 1.95 | 1.79 | 1.87 | 2.51 | 2.22 | 1.85 | - | 1.45 | - | - | 12.81 |
| 195 | 5.58 | - | - | 3.48 | 3.44 | 3.40 | 3.51 | 5.85 | - | 1.47 | 1.31 | 1.95 | 1.79 | 1.87 | 2.50 | 2.22 | 1.85 | - | 1.46 | - | - | 12.81 |
| 196 | 5.58 | - | - | 3.46 | 3.46 | 3.37 | 3.53 | 5.85 | - | 1.47 | 1.31 | 1.95 | 1.79 | 1.87 | 2.50 | 2.21 | 1.86 | - | 1.46 | - | - | 12.81 |
| 197 | 5.59 | - | - | 3.48 | 3.43 | 3.35 | 3.56 | 5.84 | - | 1.48 | 1.31 | 1.95 | 1.79 | 1.87 | 2.22 | 2.50 | 1.85 | - | 1.46 | - | - | 12.81 |
| 198 | 5.59 | - | - | 3.41 | 3.50 | 3.34 | 3.56 | 5.85 | - | 1.48 | 1.31 | 1.95 | 1.79 | 1.87 | 2.22 | 2.50 | 1.84 | - | 1.46 | - | - | 12.81 |
| 199 | 5.59 | - | - | 3.40 | 3.52 | 3.31 | 3.58 | 5.85 | - | 1.48 | 1.31 | 1.95 | 1.79 | 1.87 | 2.21 | 2.50 | 1.84 | - | 1.47 | - | - | 12.81 |
| 200 | 5.60 | - | - | 3.37 | 3.54 | 3.30 | 3.61 | 5.84 | - | 1.48 | 1.31 | 1.95 | 1.79 | 1.87 | 2.21 | 2.51 | 1.85 | - | 1.47 | - | - | 12.81 |
| 201 | 5.59 | - | - | 3.36 | 3.56 | 3.29 | 3.63 | 5.84 | - | 1.48 | 1.31 | 1.95 | 1.79 | 1.87 | 2.21 | 2.50 | 1.85 | - | 1.47 | - | - | 12.81 |
| 202 | 5.58 | - | - | 3.34 | 3.56 | 3.26 | 3.64 | 5.84 | - | 1.48 | 1.31 | 1.95 | 1.79 | 1.87 | 2.22 | 2.50 | 1.86 | - | 1.47 | - | - | 12.81 |

|     |      |   |   |      |      |      |      |      |   |      |      |      |      |      |      |      |      |   |      |   |   |       |
|-----|------|---|---|------|------|------|------|------|---|------|------|------|------|------|------|------|------|---|------|---|---|-------|
| 203 | 5.57 | - | - | 3.33 | 3.57 | 3.26 | 3.64 | 5.84 | - | 1.48 | 1.32 | 1.95 | 1.79 | 1.88 | 2.22 | 2.50 | 1.86 | - | 1.47 | - | - | 12.81 |
| 204 | 5.57 | - | - | 3.32 | 3.59 | 3.25 | 3.65 | 5.83 | - | 1.47 | 1.32 | 1.95 | 1.79 | 1.87 | 2.22 | 2.50 | 1.86 | - | 1.48 | - | - | 12.81 |
| 205 | 5.58 | - | - | 3.32 | 3.60 | 3.24 | 3.66 | 5.83 | - | 1.47 | 1.32 | 1.95 | 1.79 | 1.87 | 2.22 | 2.50 | 1.86 | - | 1.48 | - | - | 12.81 |
| 206 | 5.58 | - | - | 3.31 | 3.61 | 3.24 | 3.67 | 5.84 | - | 1.47 | 1.32 | 1.94 | 1.79 | 1.87 | 2.23 | 2.50 | 1.85 | - | 1.48 | - | - | 12.81 |
| 207 | 5.58 | - | - | 3.30 | 3.61 | 3.25 | 3.68 | 5.83 | - | 1.48 | 1.32 | 1.95 | 1.79 | 1.87 | 2.23 | 2.50 | 1.85 | - | 1.48 | - | - | 12.81 |
| 208 | 5.59 | - | - | 3.30 | 3.62 | 3.25 | 3.67 | 5.83 | - | 1.47 | 1.32 | 1.95 | 1.79 | 1.87 | 2.24 | 2.49 | 1.85 | - | 1.48 | - | - | 12.81 |
| 209 | 5.59 | - | - | 3.30 | 3.62 | 3.25 | 3.69 | 5.83 | - | 1.47 | 1.31 | 1.94 | 1.79 | 1.87 | 2.23 | 2.49 | 1.85 | - | 1.48 | - | - | 12.81 |
| 210 | 5.59 | - | - | 3.28 | 3.63 | 3.25 | 3.69 | 5.83 | - | 1.47 | 1.31 | 1.94 | 1.79 | 1.87 | 2.23 | 2.49 | 1.85 | - | 1.48 | - | - | 12.81 |
| 211 | 5.59 | - | - | 3.29 | 3.64 | 3.24 | 3.70 | 5.83 | - | 1.47 | 1.31 | 1.94 | 1.79 | 1.87 | 2.24 | 2.49 | 1.85 | - | 1.48 | - | - | 12.81 |
| 212 | 5.60 | - | - | 3.29 | 3.64 | 3.24 | 3.70 | 5.83 | - | 1.47 | 1.31 | 1.95 | 1.79 | 1.87 | 2.24 | 2.48 | 1.84 | - | 1.48 | - | - | 12.81 |
| 213 | 5.59 | - | - | 3.29 | 3.64 | 3.25 | 3.68 | 5.83 | - | 1.47 | 1.31 | 1.95 | 1.78 | 1.87 | 2.24 | 2.48 | 1.85 | - | 1.48 | - | - | 12.81 |
| 214 | 5.59 | - | - | 3.28 | 3.64 | 3.25 | 3.69 | 5.84 | - | 1.47 | 1.31 | 1.94 | 1.78 | 1.88 | 2.24 | 2.47 | 1.85 | - | 1.47 | - | - | 12.81 |
| 215 | 5.58 | - | - | 3.29 | 3.64 | 3.25 | 3.69 | 5.83 | - | 1.47 | 1.31 | 1.94 | 1.78 | 1.88 | 2.24 | 2.47 | 1.85 | - | 1.47 | - | - | 12.81 |
| 216 | 5.58 | - | - | 3.29 | 3.64 | 3.24 | 3.69 | 5.82 | - | 1.47 | 1.31 | 1.94 | 1.78 | 1.87 | 2.25 | 2.47 | 1.86 | - | 1.47 | - | - | 12.82 |
| 217 | 5.59 | - | - | 3.28 | 3.64 | 3.24 | 3.70 | 5.82 | - | 1.47 | 1.31 | 1.94 | 1.78 | 1.87 | 2.24 | 2.46 | 1.85 | - | 1.47 | - | - | 12.82 |
| 218 | 5.59 | - | - | 3.28 | 3.64 | 3.24 | 3.69 | 5.82 | - | 1.47 | 1.31 | 1.94 | 1.78 | 1.87 | 2.25 | 2.46 | 1.85 | - | 1.47 | - | - | 12.81 |
| 219 | 5.59 | - | - | 3.28 | 3.65 | 3.24 | 3.69 | 5.82 | - | 1.47 | 1.31 | 1.94 | 1.78 | 1.87 | 2.26 | 2.46 | 1.84 | - | 1.47 | - | - | 12.82 |
| 220 | 5.59 | - | - | 3.27 | 3.65 | 3.24 | 3.68 | 5.83 | - | 1.47 | 1.31 | 1.95 | 1.78 | 1.87 | 2.27 | 2.46 | 1.85 | - | 1.47 | - | - | 12.82 |
| 221 | 5.59 | - | - | 3.27 | 3.65 | 3.23 | 3.69 | 5.82 | - | 1.47 | 1.31 | 1.95 | 1.78 | 1.87 | 2.27 | 2.45 | 1.85 | - | 1.48 | - | - | 12.82 |
| 222 | 5.58 | - | - | 3.28 | 3.64 | 3.23 | 3.70 | 5.83 | - | 1.47 | 1.31 | 1.95 | 1.78 | 1.87 | 2.27 | 2.45 | 1.85 | - | 1.48 | - | - | 12.82 |
| 223 | 5.58 | - | - | 3.27 | 3.65 | 3.25 | 3.69 | 5.82 | - | 1.47 | 1.31 | 1.95 | 1.78 | 1.88 | 2.28 | 2.45 | 1.84 | - | 1.48 | - | - | 12.82 |
| 224 | 5.57 | - | - | 3.28 | 3.64 | 3.25 | 3.68 | 5.82 | - | 1.47 | 1.30 | 1.95 | 1.80 | 1.88 | 2.28 | 2.45 | 1.84 | - | 1.48 | - | - | 12.82 |
| 225 | 5.58 | - | - | 3.28 | 3.64 | 3.25 | 3.69 | 5.82 | - | 1.47 | 1.30 | 1.95 | 1.80 | 1.88 | 2.29 | 2.45 | 1.83 | - | 1.48 | - | - | 12.82 |
| 226 | 5.59 | - | - | 3.28 | 3.63 | 3.24 | 3.69 | 5.82 | - | 1.47 | 1.30 | 1.95 | 1.80 | 1.88 | 2.29 | 2.45 | 1.84 | - | 1.48 | - | - | 12.82 |
| 227 | 5.60 | - | - | 3.28 | 3.63 | 3.24 | 3.70 | 5.82 | - | 1.47 | 1.31 | 1.94 | 1.80 | 1.88 | 2.29 | 2.44 | 1.84 | - | 1.48 | - | - | 12.82 |
| 228 | 5.60 | - | - | 3.28 | 3.63 | 3.25 | 3.69 | 5.82 | - | 1.47 | 1.31 | 1.94 | 1.80 | 1.88 | 2.29 | 2.44 | 1.85 | - | 1.48 | - | - | 12.82 |
| 229 | 5.60 | - | - | 3.28 | 3.64 | 3.25 | 3.69 | 5.81 | - | 1.48 | 1.31 | 1.94 | 1.80 | 1.88 | 2.29 | 2.44 | 1.84 | - | 1.48 | - | - | 12.81 |
| 230 | 5.59 | - | - | 3.64 | 3.27 | 3.24 | 3.70 | 5.81 | - | 1.48 | 1.31 | 1.94 | 1.79 | 1.88 | 2.30 | 2.43 | 1.84 | - | 1.48 | - | - | 12.82 |
| 231 | 5.59 | - | - | 3.64 | 3.27 | 3.23 | 3.70 | 5.79 | - | 1.48 | 1.30 | 1.95 | 1.79 | 1.88 | 2.30 | 2.44 | 1.84 | - | 1.48 | - | - | 12.81 |
| 232 | 5.59 | - | - | 3.64 | 3.27 | 3.24 | 3.70 | 5.78 | - | 1.48 | 1.30 | 1.95 | 1.79 | 1.87 | 2.30 | 2.44 | 1.84 | - | 1.48 | - | - | 12.81 |
| 233 | 5.59 | - | - | 3.64 | 3.27 | 3.25 | 3.70 | 5.79 | - | 1.47 | 1.30 | 1.95 | 1.79 | 1.87 | 2.30 | 2.44 | 1.85 | - | 1.48 | - | - | 12.81 |
| 234 | 5.59 | - | - | 3.64 | 3.28 | 3.24 | 3.69 | 5.81 | - | 1.46 | 1.30 | 1.95 | 1.79 | 1.87 | 2.31 | 2.44 | 1.84 | - | 1.48 | - | - | 12.81 |
| 235 | 5.58 | - | - | 3.64 | 3.28 | 3.25 | 3.69 | 5.82 | - | 1.45 | 1.30 | 1.94 | 1.79 | 1.87 | 2.32 | 2.44 | 1.85 | - | 1.48 | - | - | 12.81 |
| 236 | 5.59 | - | - | 3.63 | 3.29 | 3.25 | 3.69 | 5.83 | - | 1.46 | 1.30 | 1.95 | 1.79 | 1.88 | 2.32 | 2.44 | 1.85 | - | 1.48 | - | - | 12.81 |
| 237 | 5.59 | - | - | 3.64 | 3.29 | 3.25 | 3.69 | 5.83 | - | 1.46 | 1.30 | 1.95 | 1.79 | 1.88 | 2.32 | 2.43 | 1.85 | - | 1.48 | - | - | 12.81 |

|     |      |   |   |      |      |      |      |      |   |      |      |      |      |      |      |      |      |   |      |   |   |       |
|-----|------|---|---|------|------|------|------|------|---|------|------|------|------|------|------|------|------|---|------|---|---|-------|
| 238 | 5.59 | - | - | 3.65 | 3.28 | 3.24 | 3.70 | 5.83 | - | 1.46 | 1.30 | 1.95 | 1.79 | 1.88 | 2.32 | 2.43 | 1.85 | - | 1.47 | - | - | 12.81 |
| 239 | 5.58 | - | - | 3.65 | 3.28 | 3.25 | 3.69 | 5.83 | - | 1.46 | 1.30 | 1.95 | 1.79 | 1.88 | 2.32 | 2.43 | 1.85 | - | 1.47 | - | - | 12.82 |
| 240 | 5.58 | - | - | 3.65 | 3.28 | 3.24 | 3.69 | 5.82 | - | 1.46 | 1.30 | 1.95 | 1.79 | 1.88 | 2.32 | 2.43 | 1.85 | - | 1.48 | - | - | 12.81 |
| 241 | 5.58 | - | - | 3.65 | 3.28 | 3.24 | 3.69 | 5.81 | - | 1.46 | 1.30 | 1.95 | 1.79 | 1.88 | 2.33 | 2.43 | 1.85 | - | 1.48 | - | - | 12.81 |
| 242 | 5.57 | - | - | 3.65 | 3.27 | 3.23 | 3.70 | 5.79 | - | 1.46 | 1.30 | 1.95 | 1.79 | 1.87 | 2.33 | 2.42 | 1.85 | - | 1.48 | - | - | 12.81 |
| 243 | 5.56 | - | - | 3.66 | 3.27 | 3.24 | 3.69 | 5.81 | - | 1.46 | 1.30 | 1.94 | 1.79 | 1.87 | 2.33 | 2.42 | 1.84 | - | 1.48 | - | - | 12.82 |
| 244 | 5.57 | - | - | 3.65 | 3.27 | 3.25 | 3.68 | 5.81 | - | 1.46 | 1.30 | 1.95 | 1.79 | 1.88 | 2.34 | 2.41 | 1.85 | - | 1.48 | - | - | 12.82 |
| 245 | 5.57 | - | - | 3.65 | 3.27 | 3.25 | 3.68 | 5.81 | - | 1.46 | 1.30 | 1.95 | 1.79 | 1.88 | 2.33 | 2.42 | 1.85 | - | 1.48 | - | - | 12.82 |
| 246 | 5.58 | - | - | 3.65 | 3.27 | 3.25 | 3.68 | 5.82 | - | 1.46 | 1.30 | 1.95 | 1.79 | 1.88 | 2.33 | 2.41 | 1.84 | - | 1.48 | - | - | 12.82 |
| 247 | 5.59 | - | - | 3.64 | 3.28 | 3.24 | 3.68 | 5.82 | - | 1.45 | 1.30 | 1.95 | 1.79 | 1.87 | 2.34 | 2.41 | 1.84 | - | 1.48 | - | - | 12.82 |
| 248 | 5.58 | - | - | 3.64 | 3.27 | 3.23 | 3.69 | 5.82 | - | 1.45 | 1.31 | 1.95 | 1.80 | 1.88 | 2.34 | 2.40 | 1.85 | - | 1.48 | - | - | 12.82 |
| 249 | 5.58 | - | - | 3.27 | 3.65 | 3.23 | 3.68 | 5.82 | - | 1.45 | 1.31 | 1.94 | 1.80 | 1.88 | 2.40 | 2.34 | 1.85 | - | 1.48 | - | - | 12.82 |
| 250 | 5.58 | - | - | 3.27 | 3.65 | 3.24 | 3.68 | 5.81 | - | 1.45 | 1.30 | 1.94 | 1.80 | 1.88 | 2.34 | 2.41 | 1.85 | - | 1.48 | - | - | 12.82 |
| 251 | 5.58 | - | - | 3.27 | 3.64 | 3.25 | 3.68 | 5.79 | - | 1.46 | 1.31 | 1.94 | 1.79 | 1.88 | 2.34 | 2.40 | 1.85 | - | 1.48 | - | - | 12.82 |
| 252 | 5.57 | - | - | 3.27 | 3.65 | 3.25 | 3.69 | 5.79 | - | 1.46 | 1.30 | 1.94 | 1.79 | 1.88 | 2.34 | 2.41 | 1.86 | - | 1.48 | - | - | 12.82 |
| 253 | 5.58 | - | - | 3.26 | 3.65 | 3.26 | 3.68 | 5.81 | - | 1.46 | 1.30 | 1.94 | 1.79 | 1.88 | 2.34 | 2.41 | 1.85 | - | 1.48 | - | - | 12.82 |
| 254 | 5.58 | - | - | 3.26 | 3.65 | 3.26 | 3.67 | 5.81 | - | 1.46 | 1.30 | 1.94 | 1.79 | 1.88 | 2.34 | 2.40 | 1.85 | - | 1.48 | - | - | 12.82 |
| 255 | 5.58 | - | - | 3.26 | 3.66 | 3.26 | 3.68 | 5.82 | - | 1.46 | 1.30 | 1.94 | 1.79 | 1.88 | 2.35 | 2.40 | 1.85 | - | 1.49 | - | - | 12.82 |
| 256 | 5.58 | - | - | 3.26 | 3.65 | 3.26 | 3.68 | 5.82 | - | 1.46 | 1.30 | 1.95 | 1.79 | 1.87 | 2.34 | 2.41 | 1.85 | - | 1.49 | - | - | 12.82 |
| 257 | 5.58 | - | - | 3.26 | 3.65 | 3.26 | 3.67 | 5.82 | - | 1.46 | 1.30 | 1.94 | 1.79 | 1.87 | 2.34 | 2.41 | 1.85 | - | 1.49 | - | - | 12.82 |
| 258 | 5.59 | - | - | 3.26 | 3.65 | 3.26 | 3.67 | 5.83 | - | 1.46 | 1.30 | 1.95 | 1.79 | 1.87 | 2.35 | 2.42 | 1.84 | - | 1.48 | - | - | 12.82 |
| 259 | 5.58 | - | - | 3.27 | 3.65 | 3.25 | 3.68 | 5.81 | - | 1.45 | 1.30 | 1.95 | 1.79 | 1.87 | 2.35 | 2.42 | 1.85 | - | 1.48 | - | - | 12.82 |
| 260 | 5.58 | - | - | 3.27 | 3.65 | 3.26 | 3.68 | 5.81 | - | 1.45 | 1.30 | 1.95 | 1.79 | 1.87 | 2.35 | 2.41 | 1.85 | - | 1.48 | - | - | 12.82 |
| 261 | 5.59 | - | - | 3.27 | 3.65 | 3.26 | 3.68 | 5.79 | - | 1.45 | 1.29 | 1.95 | 1.79 | 1.87 | 2.36 | 2.40 | 1.84 | - | 1.48 | - | - | 12.82 |
| 262 | 5.58 | - | - | 3.27 | 3.65 | 3.26 | 3.68 | 5.79 | - | 1.45 | 1.29 | 1.95 | 1.79 | 1.88 | 2.36 | 2.40 | 1.85 | - | 1.48 | - | - | 12.82 |
| 263 | 5.58 | - | - | 3.26 | 3.66 | 3.26 | 3.68 | 5.81 | - | 1.45 | 1.29 | 1.95 | 1.79 | 1.88 | 2.37 | 2.40 | 1.85 | - | 1.48 | - | - | 12.82 |
| 264 | 5.58 | - | - | 3.27 | 3.66 | 3.26 | 3.68 | 5.81 | - | 1.45 | 1.30 | 1.95 | 1.79 | 1.88 | 2.36 | 2.40 | 1.86 | - | 1.49 | - | - | 12.82 |



**Table S13.** ELF basin populations for the oxidation of **R3**

|    | V1(O3) | V2(O3) | V3(O3) | V1(O4) | V2(O4) | V1(O5) | V2(O5) | V1(O6) | V2(O6) | V3(O6) | V(C1,S10) | V(C9,S10) | V(C1,C2) | V(C2,C8) | V(C8,C9) | V1(S10) | V2(S10) | V(O3,H) | V(C1,H) | V(C1,O6) | V(C1) | V(H) | Ru    |
|----|--------|--------|--------|--------|--------|--------|--------|--------|--------|--------|-----------|-----------|----------|----------|----------|---------|---------|---------|---------|----------|-------|------|-------|
| 1  | 6.87   | -      | -      | 6.85   | -      | 6.87   | -      | 6.91   | -      | -      | 1.52      | 1.51      | 1.83     | 1.81     | 1.84     | 2.22    | 2.29    | -       | 2.05    | -        | -     | -    | 12.17 |
| 2  | 6.87   | -      | -      | 6.85   | -      | 6.87   | -      | 6.91   | -      | -      | 1.52      | 1.51      | 1.83     | 1.81     | 1.84     | 2.22    | 2.29    | -       | 2.05    | -        | -     | -    | 12.17 |
| 3  | 6.87   | -      | -      | 6.86   | -      | 6.88   | -      | 6.91   | -      | -      | 1.52      | 1.51      | 1.83     | 1.81     | 1.84     | 2.22    | 2.29    | -       | 2.05    | -        | -     | -    | 12.17 |
| 4  | 6.87   | -      | -      | 6.85   | -      | 6.88   | -      | 6.91   | -      | -      | 1.53      | 1.51      | 1.83     | 1.81     | 1.84     | 2.22    | 2.29    | -       | 2.05    | -        | -     | -    | 12.17 |
| 5  | 6.86   | -      | -      | 6.86   | -      | 6.87   | -      | 6.91   | -      | -      | 1.52      | 1.51      | 1.83     | 1.81     | 1.84     | 2.21    | 2.29    | -       | 2.05    | -        | -     | -    | 12.17 |
| 6  | 6.86   | -      | -      | 6.86   | -      | 6.87   | -      | 6.92   | -      | -      | 1.53      | 1.51      | 1.83     | 1.81     | 1.84     | 2.21    | 2.29    | -       | 2.05    | -        | -     | -    | 12.18 |
| 7  | 6.85   | -      | -      | 6.87   | -      | 6.87   | -      | 6.92   | -      | -      | 1.53      | 1.51      | 1.83     | 1.81     | 1.84     | 2.21    | 2.29    | -       | 2.05    | -        | -     | -    | 12.18 |
| 8  | 6.86   | -      | -      | 6.87   | -      | 6.87   | -      | 6.92   | -      | -      | 1.53      | 1.51      | 1.83     | 1.81     | 1.84     | 2.21    | 2.29    | -       | 2.05    | -        | -     | -    | 12.18 |
| 9  | 6.85   | -      | -      | 6.87   | -      | 6.87   | -      | 6.91   | -      | -      | 1.53      | 1.51      | 1.83     | 1.81     | 1.84     | 2.21    | 2.28    | -       | 2.04    | -        | -     | -    | 12.18 |
| 10 | 6.85   | -      | -      | 6.87   | -      | 6.88   | -      | 6.91   | -      | -      | 1.53      | 1.51      | 1.83     | 1.81     | 1.84     | 2.28    | 2.21    | -       | 2.04    | -        | -     | -    | 12.18 |
| 11 | 6.85   | -      | -      | 6.87   | -      | 6.88   | -      | 6.91   | -      | -      | 1.54      | 1.51      | 1.83     | 1.81     | 1.84     | 2.28    | 2.20    | -       | 2.04    | -        | -     | -    | 12.19 |
| 12 | 6.85   | -      | -      | 6.87   | -      | 6.89   | -      | 6.92   | -      | -      | 1.54      | 1.51      | 1.83     | 1.82     | 1.84     | 2.28    | 2.20    | -       | 2.03    | -        | -     | -    | 12.19 |
| 13 | 6.85   | -      | -      | 6.88   | -      | 6.89   | -      | 6.92   | -      | -      | 1.54      | 1.51      | 1.83     | 1.81     | 1.84     | 2.28    | 2.20    | -       | 2.03    | -        | -     | -    | 12.19 |
| 14 | 6.85   | -      | -      | 6.88   | -      | 6.89   | -      | 4.84   | 2.08   | -      | 1.54      | 1.51      | 1.83     | 1.81     | 1.84     | 2.28    | 2.20    | -       | 2.03    | -        | -     | -    | 12.19 |
| 15 | 6.85   | -      | -      | 6.88   | -      | 6.89   | -      | 4.69   | 2.23   | -      | 1.55      | 1.51      | 1.84     | 1.81     | 1.84     | 2.20    | 2.28    | -       | 2.03    | -        | -     | -    | 12.19 |
| 16 | 6.84   | -      | -      | 6.87   | -      | 6.89   | -      | 4.63   | 2.29   | -      | 1.55      | 1.51      | 1.83     | 1.81     | 1.84     | 2.19    | 2.27    | -       | 2.02    | -        | -     | -    | 12.19 |
| 17 | 6.84   | -      | -      | 6.87   | -      | 6.89   | -      | 4.55   | 2.36   | -      | 1.55      | 1.51      | 1.83     | 1.81     | 1.84     | 2.19    | 2.28    | -       | 2.02    | -        | -     | -    | 12.20 |
| 18 | 6.84   | -      | -      | 3.68   | 3.18   | 6.90   | -      | 4.48   | 2.43   | -      | 1.55      | 1.51      | 1.84     | 1.81     | 1.83     | 2.19    | 2.27    | -       | 2.01    | -        | -     | -    | 12.20 |
| 19 | 6.85   | -      | -      | 3.60   | 3.26   | 4.01   | 2.88   | 4.40   | 2.51   | -      | 1.55      | 1.51      | 1.83     | 1.81     | 1.84     | 2.18    | 2.27    | -       | 2.01    | -        | -     | -    | 12.20 |
| 20 | 6.84   | -      | -      | 3.53   | 3.34   | 3.91   | 2.99   | 4.32   | 2.59   | -      | 1.55      | 1.51      | 1.84     | 1.81     | 1.84     | 2.18    | 2.27    | -       | 2.01    | -        | -     | -    | 12.20 |
| 21 | 6.85   | -      | -      | 3.52   | 3.36   | 3.84   | 3.05   | 2.64   | 4.28   | -      | 1.56      | 1.51      | 1.83     | 1.81     | 1.84     | 2.18    | 2.27    | -       | 2.00    | -        | -     | -    | 12.21 |
| 22 | 6.84   | -      | -      | 3.52   | 3.37   | 3.78   | 3.11   | 2.72   | 4.20   | -      | 1.56      | 1.51      | 1.84     | 1.81     | 1.84     | 2.18    | 2.27    | -       | 2.00    | -        | -     | -    | 12.21 |
| 23 | 1.81   | -      | -      | 3.53   | 3.36   | 3.75   | 3.14   | 2.79   | 4.13   | -      | 1.57      | 1.51      | 1.84     | 1.81     | 1.84     | 2.17    | 2.26    | -       | 1.99    | -        | -     | -    | 12.21 |
| 24 | 6.84   | -      | -      | 3.54   | 3.35   | 3.73   | 3.16   | 2.86   | 4.05   | -      | 1.57      | 1.50      | 1.84     | 1.81     | 1.84     | 2.17    | 2.26    | -       | 1.99    | -        | -     | -    | 12.22 |
| 25 | 6.84   | -      | -      | 3.55   | 3.35   | 3.72   | 3.18   | 2.92   | 4.00   | -      | 1.58      | 1.50      | 1.84     | 1.81     | 1.84     | 2.17    | 2.26    | -       | 1.98    | -        | -     | -    | 12.22 |
| 26 | 6.85   | -      | -      | 3.56   | 3.34   | 3.71   | 3.18   | 2.98   | 3.93   | -      | 1.58      | 1.51      | 1.84     | 1.81     | 1.84     | 2.16    | 2.26    | -       | 1.97    | -        | -     | -    | 12.22 |
| 27 | 6.85   | -      | -      | 3.57   | 3.34   | 3.70   | 3.20   | 3.04   | 3.88   | -      | 1.58      | 1.51      | 1.84     | 1.81     | 1.84     | 2.16    | 2.26    | -       | 1.96    | -        | -     | -    | 12.22 |
| 28 | 6.85   | -      | -      | 3.58   | 3.32   | 3.68   | 3.21   | 3.07   | 3.85   | -      | 1.59      | 1.51      | 1.84     | 1.81     | 1.84     | 2.15    | 2.25    | -       | 1.96    | -        | -     | -    | 12.23 |

|    |      |      |      |      |      |      |      |      |      |      |      |      |      |      |      |      |      |      |      |   |      |      |       |
|----|------|------|------|------|------|------|------|------|------|------|------|------|------|------|------|------|------|------|------|---|------|------|-------|
| 29 | 6.85 | -    | -    | 3.60 | 3.30 | 3.69 | 3.22 | 3.11 | 3.80 | -    | 1.60 | 1.51 | 1.84 | 1.81 | 1.84 | 2.14 | 2.25 | -    | 1.95 | - | -    | -    | 12.24 |
| 30 | 6.85 | -    | -    | 3.63 | 3.28 | 3.70 | 3.20 | 3.15 | 3.77 | -    | 1.60 | 1.51 | 1.84 | 1.81 | 1.84 | 2.14 | 2.25 | -    | 1.93 | - | -    | -    | 12.24 |
| 31 | 3.69 | 3.17 | -    | 3.62 | 3.28 | 3.70 | 3.20 | 3.17 | 3.74 | -    | 1.61 | 1.51 | 1.84 | 1.81 | 1.84 | 2.13 | 2.25 | -    | 1.92 | - | -    | -    | 12.25 |
| 32 | 3.65 | 3.21 | -    | 3.64 | 3.26 | 3.71 | 3.20 | 3.20 | 3.72 | -    | 1.61 | 1.51 | 1.84 | 1.81 | 1.84 | 2.13 | 2.25 | -    | 1.91 | - | -    | -    | 12.26 |
| 33 | 3.60 | 3.26 | -    | 3.65 | 3.24 | 3.72 | 3.19 | 3.22 | 3.70 | -    | 1.62 | 1.51 | 1.84 | 1.81 | 1.84 | 2.12 | 2.25 | -    | 1.91 | - | -    | -    | 12.27 |
| 34 | 3.56 | 3.30 | -    | 3.68 | 3.21 | 3.74 | 3.17 | 3.23 | 3.68 | -    | 1.64 | 1.51 | 1.85 | 1.81 | 1.84 | 2.11 | 2.25 | -    | 1.89 | - | -    | -    | 12.28 |
| 35 | 3.54 | 3.33 | -    | 3.72 | 3.18 | 3.77 | 3.15 | 3.24 | 3.67 | -    | 1.65 | 1.51 | 1.85 | 1.81 | 1.84 | 2.09 | 2.25 | -    | 1.85 | - | -    | -    | 12.30 |
| 36 | 3.52 | 3.34 | -    | 3.76 | 3.13 | 3.81 | 3.11 | 3.27 | 3.65 | -    | 1.66 | 1.51 | 1.85 | 1.81 | 1.84 | 2.08 | 2.24 | -    | 1.82 | - | -    | -    | 12.32 |
| 37 | 3.47 | 3.39 | -    | 3.80 | 3.10 | 3.83 | 3.09 | 3.28 | 3.65 | -    | 1.69 | 1.51 | 1.86 | 1.81 | 1.84 | 2.06 | 2.25 | -    | 1.78 | - | -    | -    | 12.34 |
| 38 | 3.39 | 3.15 | 0.32 | 3.83 | 3.08 | 3.85 | 3.08 | 3.30 | 3.64 | -    | 1.71 | 1.51 | 1.87 | 1.81 | 1.84 | 2.03 | 2.25 | -    | 1.72 | - | -    | -    | 12.37 |
| 39 | 3.34 | 3.05 | 0.45 | 3.83 | 3.09 | 3.85 | 3.08 | 3.31 | 3.65 | -    | 1.73 | 1.51 | 1.89 | 1.81 | 1.84 | 2.01 | 2.26 | -    | 1.65 | - | -    | -    | 12.40 |
| 40 | 2.93 | 3.29 | 0.59 | 3.82 | 3.09 | 3.82 | 3.11 | 3.29 | 3.66 | -    | 1.76 | 1.52 | 1.90 | 1.81 | 1.84 | 1.98 | 2.26 | -    | -    | - | 0.89 | 0.70 | 12.45 |
| 41 | 6.08 | -    | 0.70 | 3.80 | 3.12 | 3.80 | 3.14 | 3.28 | 3.68 | -    | 1.79 | 1.52 | 1.91 | 1.81 | 1.84 | 1.95 | 2.27 | -    | -    | - | 0.83 | 0.70 | 12.48 |
| 42 | 6.00 | -    | -    | 3.78 | 3.15 | 3.78 | 3.16 | 3.28 | 3.67 | -    | 1.83 | 1.52 | 1.93 | 1.81 | 1.84 | 1.93 | 2.27 | 1.47 | -    | - | 0.77 | -    | 12.50 |
| 43 | 5.95 | -    | -    | 3.76 | 3.18 | 3.77 | 3.17 | 3.28 | 3.68 | -    | 1.86 | 1.52 | 1.94 | 1.81 | 1.84 | 1.90 | 2.28 | 1.51 | -    | - | 0.71 | -    | 12.52 |
| 44 | 5.92 | -    | -    | 3.74 | 3.20 | 3.75 | 3.19 | 3.28 | 3.68 | -    | 1.89 | 1.52 | 1.95 | 1.81 | 1.84 | 1.88 | 2.29 | 1.55 | -    | - | 0.66 | -    | 12.54 |
| 45 | 5.90 | -    | -    | 3.73 | 3.21 | 3.74 | 3.21 | 3.28 | 3.69 | -    | 1.92 | 1.52 | 1.96 | 1.81 | 1.84 | 1.86 | 2.29 | 1.57 | -    | - | 0.61 | -    | 12.56 |
| 46 | 2.77 | 3.11 | -    | 3.70 | 3.23 | 3.73 | 3.22 | 3.26 | 3.71 | -    | 1.94 | 1.52 | 1.97 | 1.81 | 1.84 | 1.84 | 2.30 | 1.59 | -    | - | 0.57 | -    | 12.57 |
| 47 | 2.75 | 3.13 | -    | 3.69 | 3.24 | 3.72 | 3.22 | 3.26 | 3.71 | -    | 1.96 | 1.52 | 1.97 | 1.81 | 1.84 | 1.83 | 2.30 | 1.60 | -    | - | 0.54 | -    | 12.58 |
| 48 | 2.74 | 3.12 | -    | 3.67 | 3.26 | 3.70 | 3.24 | 3.25 | 3.72 | -    | 1.98 | 1.52 | 1.98 | 1.81 | 1.84 | 2.30 | 1.82 | 1.62 | -    | - | 0.51 | -    | 12.58 |
| 49 | 2.72 | 3.12 | -    | 3.66 | 3.27 | 3.70 | 3.25 | 3.24 | 3.72 | -    | 2.00 | 1.52 | 1.98 | 1.81 | 1.84 | 1.81 | 2.31 | 1.63 | -    | - | 0.48 | -    | 12.59 |
| 50 | 2.73 | 3.11 | -    | 3.66 | 3.28 | 3.70 | 3.26 | 3.22 | 3.73 | -    | 2.02 | 1.52 | 1.99 | 1.81 | 1.84 | 1.80 | 2.31 | 1.64 | -    | - | 0.45 | -    | 12.60 |
| 51 | 2.74 | 3.09 | -    | 3.65 | 3.29 | 3.69 | 3.26 | 3.19 | 3.74 | -    | 2.03 | 1.52 | 1.99 | 1.81 | 1.85 | 1.79 | 2.31 | 1.65 | -    | - | 0.43 | -    | 12.60 |
| 52 | 2.73 | 3.09 | -    | 3.65 | 3.30 | 3.69 | 3.26 | 3.17 | 3.79 | -    | 2.05 | 1.52 | 1.99 | 1.81 | 1.85 | 1.79 | 2.31 | 1.66 | -    | - | 0.40 | -    | 12.60 |
| 53 | 2.74 | 3.07 | -    | 3.29 | 3.66 | 3.27 | 3.67 | 3.16 | 3.80 | -    | 2.06 | 1.51 | 2.00 | 1.81 | 1.85 | 1.78 | 2.32 | 1.67 | -    | - | 0.38 | -    | 12.61 |
| 54 | 2.74 | 3.06 | -    | 3.31 | 3.64 | 3.28 | 3.68 | 3.80 | 0.40 | 2.77 | 2.08 | 1.51 | 2.00 | 1.81 | 1.85 | 1.78 | 2.32 | 1.67 | -    | - | 0.36 | -    | 12.61 |
| 55 | 2.75 | 3.05 | -    | 3.31 | 3.64 | 3.27 | 3.68 | 3.80 | 3.16 | -    | 2.09 | 1.51 | 2.00 | 1.81 | 1.85 | 1.78 | 2.32 | 1.69 | -    | - | 0.35 | -    | 12.61 |
| 56 | 2.74 | 3.05 | -    | 3.31 | 3.63 | 3.28 | 3.68 | 3.15 | 3.82 | -    | 2.41 | 1.51 | 2.00 | 1.81 | 1.85 | 1.77 | 2.32 | 1.69 | -    | - | -    | -    | 12.62 |
| 57 | 2.76 | 3.03 | -    | 3.30 | 3.64 | 3.27 | 3.68 | 3.11 | 3.86 | -    | 2.42 | 1.51 | 2.00 | 1.81 | 1.85 | 1.77 | 2.32 | 1.69 | -    | - | -    | -    | 12.61 |
| 58 | 2.75 | 3.02 | -    | 3.30 | 3.64 | 3.28 | 3.68 | 3.09 | 3.88 | -    | 2.41 | 1.51 | 2.01 | 1.81 | 1.85 | 1.77 | 2.32 | 1.70 | -    | - | -    | -    | 12.62 |
| 59 | 2.75 | 3.01 | -    | 3.30 | 3.63 | 3.27 | 3.68 | 3.08 | 3.89 | -    | 2.41 | 1.51 | 2.01 | 1.81 | 1.85 | 1.77 | 2.32 | 1.71 | -    | - | -    | -    | 12.63 |
| 60 | 2.75 | 3.01 | -    | 3.64 | 3.30 | 3.28 | 3.68 | 3.04 | 3.94 | -    | 2.40 | 1.51 | 2.01 | 1.81 | 1.85 | 1.77 | 2.32 | 1.70 | -    | - | -    | -    | 12.62 |
| 61 | 2.76 | 2.99 | -    | 3.30 | 3.64 | 3.28 | 3.68 | 3.01 | 3.95 | -    | 2.40 | 1.51 | 2.01 | 1.81 | 1.85 | 1.77 | 2.33 | 1.71 | -    | - | -    | -    | 12.63 |
| 62 | 2.76 | 2.99 | -    | 3.29 | 3.64 | 3.27 | 3.67 | 2.95 | 4.00 | -    | 2.39 | 1.51 | 2.02 | 1.81 | 1.85 | 1.77 | 2.32 | 1.72 | -    | - | -    | -    | 12.63 |
| 63 | 2.76 | 2.99 | -    | 3.30 | 3.65 | 3.28 | 3.68 | 2.91 | 4.05 | -    | 2.39 | 1.51 | 2.02 | 1.81 | 1.85 | 1.77 | 2.32 | 1.72 | -    | - | -    | -    | 12.64 |

|    |      |      |   |      |      |      |      |      |      |   |      |      |      |      |      |      |      |      |   |   |   |   |       |
|----|------|------|---|------|------|------|------|------|------|---|------|------|------|------|------|------|------|------|---|---|---|---|-------|
| 64 | 2.76 | 2.98 | - | 3.29 | 3.66 | 3.28 | 3.67 | 2.89 | 4.07 | - | 2.39 | 1.51 | 2.02 | 1.81 | 1.85 | 1.77 | 2.32 | 1.73 | - | - | - | - | 12.64 |
| 65 | 2.77 | 2.97 | - | 3.66 | 3.30 | 3.27 | 3.67 | 2.85 | 4.11 | - | 2.38 | 1.51 | 2.02 | 1.81 | 1.85 | 1.77 | 2.32 | 1.73 | - | - | - | - | 12.64 |
| 66 | 2.76 | 2.96 | - | 3.66 | 3.30 | 3.27 | 3.68 | 2.80 | 4.15 | - | 2.37 | 1.51 | 2.02 | 1.81 | 1.85 | 1.77 | 2.32 | 1.73 | - | - | - | - | 12.65 |
| 67 | 2.77 | 2.96 | - | 3.65 | 3.29 | 3.27 | 3.69 | 2.76 | 4.19 | - | 2.37 | 1.51 | 2.02 | 1.81 | 1.85 | 1.78 | 2.32 | 1.74 | - | - | - | - | 12.65 |
| 68 | 2.78 | 2.95 | - | 3.66 | 3.29 | 3.27 | 3.69 | 2.70 | 4.24 | - | 2.37 | 1.51 | 2.02 | 1.81 | 1.85 | 1.78 | 2.32 | 1.73 | - | - | - | - | 12.65 |
| 69 | 2.78 | 2.95 | - | 3.66 | 3.29 | 3.27 | 3.69 | 2.63 | 4.30 | - | 2.37 | 1.51 | 2.03 | 1.81 | 1.85 | 1.78 | 2.32 | 1.74 | - | - | - | - | 12.66 |
| 70 | 2.78 | 2.94 | - | 3.67 | 3.28 | 3.27 | 3.69 | 2.59 | 4.35 | - | 2.36 | 1.51 | 2.03 | 1.81 | 1.85 | 1.78 | 2.32 | 1.76 | - | - | - | - | 12.66 |
| 71 | 2.79 | 2.93 | - | 3.66 | 3.29 | 3.26 | 3.69 | 2.54 | 4.42 | - | 2.36 | 1.51 | 2.03 | 1.81 | 1.85 | 1.79 | 2.32 | 1.76 | - | - | - | - | 12.66 |
| 72 | 2.80 | 2.92 | - | 3.67 | 3.28 | 3.26 | 3.69 | 2.47 | 4.48 | - | 2.36 | 1.51 | 2.03 | 1.81 | 1.85 | 1.79 | 2.31 | 1.75 | - | - | - | - | 12.66 |
| 73 | 2.80 | 2.91 | - | 3.67 | 3.29 | 3.27 | 3.69 | 2.41 | 4.53 | - | 2.35 | 1.51 | 2.03 | 1.81 | 1.85 | 1.79 | 2.31 | 1.76 | - | - | - | - | 12.67 |
| 74 | 2.81 | 2.90 | - | 3.67 | 3.29 | 3.26 | 3.70 | 2.36 | 4.59 | - | 2.34 | 1.51 | 2.03 | 1.81 | 1.85 | 1.80 | 2.31 | 1.77 | - | - | - | - | 12.67 |
| 75 | 2.81 | 2.89 | - | 3.67 | 3.29 | 3.26 | 3.69 | 2.27 | 4.68 | - | 2.34 | 1.51 | 2.03 | 1.81 | 1.85 | 1.80 | 2.31 | 1.77 | - | - | - | - | 12.67 |
| 76 | 2.82 | 2.88 | - | 3.67 | 3.29 | 3.27 | 3.68 | 2.22 | 4.72 | - | 2.34 | 1.50 | 2.03 | 1.81 | 1.85 | 1.80 | 2.31 | 1.77 | - | - | - | - | 12.68 |
| 77 | 2.83 | 2.87 | - | 3.67 | 3.28 | 3.27 | 3.68 | 2.13 | 4.82 | - | 2.33 | 1.50 | 2.03 | 1.81 | 1.85 | 1.80 | 2.31 | 1.77 | - | - | - | - | 12.68 |
| 78 | 2.83 | 2.87 | - | 3.67 | 3.28 | 3.27 | 3.68 | 2.05 | 4.89 | - | 2.33 | 1.50 | 2.03 | 1.81 | 1.85 | 1.81 | 2.31 | 1.78 | - | - | - | - | 12.68 |
| 79 | 2.83 | 2.86 | - | 3.68 | 3.28 | 3.26 | 3.69 | 1.99 | 4.94 | - | 2.33 | 1.50 | 2.03 | 1.81 | 1.85 | 1.81 | 2.31 | 1.79 | - | - | - | - | 12.68 |
| 80 | 2.85 | 2.84 | - | 3.69 | 3.26 | 3.26 | 3.69 | 1.91 | 5.01 | - | 2.33 | 1.50 | 2.03 | 1.81 | 1.85 | 1.81 | 2.31 | 1.78 | - | - | - | - | 12.69 |
| 81 | 2.84 | 2.83 | - | 3.69 | 3.26 | 3.26 | 3.70 | 1.83 | 5.09 | - | 2.33 | 1.50 | 2.04 | 1.81 | 1.85 | 1.82 | 2.30 | 1.79 | - | - | - | - | 12.69 |
| 82 | 2.85 | 2.82 | - | 3.70 | 3.26 | 3.26 | 3.69 | 1.78 | 5.15 | - | 2.32 | 1.50 | 2.04 | 1.81 | 1.85 | 1.82 | 2.30 | 1.79 | - | - | - | - | 12.69 |
| 83 | 2.86 | 2.81 | - | 3.69 | 3.26 | 3.26 | 3.69 | 1.71 | 5.22 | - | 2.32 | 1.50 | 2.03 | 1.81 | 1.85 | 1.83 | 2.30 | 1.80 | - | - | - | - | 12.69 |
| 84 | 2.86 | 2.80 | - | 3.69 | 3.27 | 3.27 | 3.69 | 1.64 | 5.28 | - | 2.31 | 1.50 | 2.04 | 1.81 | 1.85 | 1.83 | 2.30 | 1.80 | - | - | - | - | 12.69 |
| 85 | 2.88 | 2.79 | - | 3.70 | 3.26 | 3.27 | 3.68 | 1.59 | 5.34 | - | 2.31 | 1.50 | 2.04 | 1.81 | 1.84 | 1.84 | 2.30 | 1.80 | - | - | - | - | 12.70 |
| 86 | 2.88 | 2.78 | - | 3.70 | 3.25 | 3.27 | 3.69 | 1.51 | 5.42 | - | 2.31 | 1.50 | 2.04 | 1.81 | 1.84 | 1.84 | 2.30 | 1.81 | - | - | - | - | 12.70 |
| 87 | 2.90 | 2.76 | - | 3.70 | 3.25 | 3.27 | 3.69 | 1.43 | 5.48 | - | 2.30 | 1.50 | 2.04 | 1.81 | 1.85 | 1.84 | 2.30 | 1.80 | - | - | - | - | 12.71 |
| 88 | 2.90 | 2.74 | - | 3.70 | 3.25 | 3.27 | 3.69 | 1.36 | 5.55 | - | 2.30 | 1.50 | 2.03 | 1.81 | 1.85 | 1.85 | 2.30 | 1.81 | - | - | - | - | 12.71 |
| 89 | 2.92 | 2.73 | - | 3.70 | 3.25 | 3.27 | 3.68 | 5.60 | 1.31 | - | 2.29 | 1.50 | 2.04 | 1.81 | 1.85 | 1.85 | 2.30 | 1.81 | - | - | - | - | 12.71 |
| 90 | 2.92 | 2.72 | - | 3.70 | 3.24 | 3.27 | 3.69 | 5.67 | 1.24 | - | 2.29 | 1.50 | 2.04 | 1.81 | 1.85 | 1.86 | 2.30 | 1.81 | - | - | - | - | 12.71 |
| 91 | 2.94 | 2.70 | - | 3.70 | 3.24 | 3.26 | 3.70 | 5.73 | 1.17 | - | 2.29 | 1.50 | 2.04 | 1.81 | 1.84 | 1.86 | 2.30 | 1.82 | - | - | - | - | 12.72 |
| 92 | 2.96 | 2.67 | - | 3.70 | 3.24 | 3.26 | 3.70 | 5.81 | 1.10 | - | 2.29 | 1.50 | 2.03 | 1.81 | 1.84 | 1.87 | 2.30 | 1.82 | - | - | - | - | 12.72 |
| 93 | 2.98 | 2.66 | - | 3.71 | 3.24 | 3.26 | 3.70 | 5.85 | 1.05 | - | 2.28 | 1.49 | 2.04 | 1.81 | 1.84 | 1.88 | 2.30 | 1.82 | - | - | - | - | 12.72 |
| 94 | 2.98 | 2.64 | - | 3.72 | 3.24 | 3.26 | 3.70 | 5.91 | 0.98 | - | 2.28 | 1.49 | 2.04 | 1.81 | 1.84 | 1.88 | 2.30 | 1.83 | - | - | - | - | 12.73 |
| 95 | 3.00 | 2.62 | - | 3.71 | 3.25 | 3.25 | 3.71 | 5.97 | 0.93 | - | 2.28 | 1.49 | 2.04 | 1.81 | 1.85 | 1.89 | 2.30 | 1.83 | - | - | - | - | 12.73 |
| 96 | 3.02 | 2.60 | - | 3.72 | 3.24 | 3.25 | 3.71 | 6.02 | 0.87 | - | 2.27 | 1.49 | 2.04 | 1.81 | 1.85 | 1.89 | 2.30 | 1.82 | - | - | - | - | 12.73 |
| 97 | 3.00 | 2.62 | - | 3.73 | 3.23 | 3.25 | 3.71 | 6.08 | 0.81 | - | 2.27 | 1.49 | 2.04 | 1.81 | 1.85 | 1.90 | 2.30 | 1.84 | - | - | - | - | 12.73 |
| 98 | 5.61 | -    | - | 3.22 | 3.73 | 3.25 | 3.71 | 0.76 | 6.13 | - | 2.27 | 1.49 | 2.04 | 1.81 | 1.84 | 1.91 | 2.30 | 1.84 | - | - | - | - | 12.74 |

|     |      |   |   |      |      |      |      |      |      |   |      |      |      |      |      |      |      |      |   |      |      |   |       |
|-----|------|---|---|------|------|------|------|------|------|---|------|------|------|------|------|------|------|------|---|------|------|---|-------|
| 99  | 5.61 | - | - | 3.22 | 3.73 | 3.24 | 3.71 | 0.71 | 6.17 | - | 2.26 | 1.49 | 2.04 | 1.81 | 1.84 | 1.92 | 2.30 | 1.84 | - | -    | -    | - | 12.74 |
| 100 | 5.61 | - | - | 3.21 | 3.73 | 3.24 | 3.72 | 0.67 | 6.21 | - | 2.26 | 1.49 | 2.04 | 1.81 | 1.84 | 1.92 | 2.29 | 1.84 | - | -    | -    | - | 12.74 |
| 101 | 5.61 | - | - | 3.21 | 3.73 | 3.23 | 3.72 | 0.62 | 6.26 | - | 2.25 | 1.49 | 2.03 | 1.81 | 1.84 | 1.93 | 2.29 | 1.84 | - | -    | -    | - | 12.75 |
| 102 | 5.60 | - | - | 3.21 | 3.73 | 3.23 | 3.72 | 0.58 | 6.29 | - | 2.25 | 1.49 | 2.03 | 1.81 | 1.85 | 1.93 | 2.29 | 1.84 | - | -    | -    | - | 12.75 |
| 103 | 5.59 | - | - | 3.20 | 3.74 | 3.22 | 3.73 | 0.55 | 6.32 | - | 2.25 | 1.49 | 2.03 | 1.81 | 1.85 | 1.94 | 2.29 | 1.85 | - | -    | -    | - | 12.75 |
| 104 | 5.60 | - | - | 3.20 | 3.74 | 3.21 | 3.73 | 0.51 | 6.34 | - | 2.24 | 1.49 | 2.03 | 1.81 | 1.85 | 1.95 | 2.29 | 1.84 | - | -    | -    | - | 12.76 |
| 105 | 5.61 | - | - | 3.20 | 3.76 | 3.21 | 3.74 | 0.48 | 6.36 | - | 2.24 | 1.49 | 2.03 | 1.81 | 1.85 | 1.95 | 2.29 | 1.85 | - | -    | -    | - | 12.76 |
| 106 | 5.60 | - | - | 3.19 | 3.76 | 3.21 | 3.73 | 0.45 | 6.40 | - | 2.24 | 1.48 | 2.03 | 1.81 | 1.84 | 1.96 | 2.29 | 1.85 | - | -    | -    | - | 12.76 |
| 107 | 5.59 | - | - | 3.20 | 3.75 | 3.20 | 3.74 | 0.42 | 6.43 | - | 2.24 | 1.48 | 2.03 | 1.81 | 1.84 | 1.97 | 2.29 | 1.85 | - | -    | -    | - | 12.77 |
| 108 | 5.59 | - | - | 3.18 | 3.77 | 3.20 | 3.74 | 0.40 | 6.46 | - | 2.23 | 1.48 | 2.03 | 1.81 | 1.84 | 1.98 | 2.30 | 1.86 | - | -    | -    | - | 12.77 |
| 109 | 5.58 | - | - | 3.17 | 3.78 | 3.20 | 3.74 | 0.39 | 6.46 | - | 2.23 | 1.48 | 2.03 | 1.81 | 1.84 | 1.99 | 2.30 | 1.86 | - | -    | -    | - | 12.78 |
| 110 | 5.58 | - | - | 3.17 | 3.78 | 3.19 | 3.75 | 0.38 | 6.46 | - | 2.22 | 1.48 | 2.02 | 1.81 | 1.84 | 2.00 | 2.30 | 1.86 | - | -    | -    | - | 12.78 |
| 111 | 5.59 | - | - | 3.15 | 3.80 | 3.20 | 3.74 | 0.38 | 6.46 | - | 2.21 | 1.48 | 2.02 | 1.81 | 1.84 | 2.00 | 2.30 | 1.85 | - | -    | -    | - | 12.78 |
| 112 | 5.59 | - | - | 3.14 | 3.81 | 3.18 | 3.76 | 0.37 | 6.47 | - | 2.20 | 1.48 | 2.02 | 1.81 | 1.84 | 2.01 | 2.31 | 1.85 | - | -    | -    | - | 12.78 |
| 113 | 5.59 | - | - | 3.13 | 3.82 | 3.18 | 3.77 | 0.37 | 6.47 | - | 2.00 | 1.47 | 2.02 | 1.81 | 1.84 | 2.02 | 2.30 | 1.86 | - | -    | 0.21 | - | 12.78 |
| 114 | 5.58 | - | - | 3.12 | 3.83 | 3.17 | 3.78 | 0.37 | 6.47 | - | 1.99 | 1.47 | 2.01 | 1.81 | 1.84 | 2.03 | 2.30 | 1.87 | - | -    | 0.21 | - | 12.79 |
| 115 | 5.58 | - | - | 3.11 | 3.84 | 3.16 | 3.78 | 0.37 | 6.46 | - | 1.98 | 1.47 | 2.01 | 1.81 | 1.84 | 2.04 | 2.30 | 1.86 | - | -    | 0.22 | - | 12.79 |
| 116 | 5.58 | - | - | 3.10 | 3.85 | 3.15 | 3.79 | 0.37 | 6.47 | - | 1.97 | 1.47 | 2.01 | 1.81 | 1.85 | 2.05 | 2.30 | 1.86 | - | -    | 0.23 | - | 12.79 |
| 117 | 5.58 | - | - | 3.10 | 3.84 | 3.15 | 3.80 | 0.37 | 6.46 | - | 1.95 | 1.47 | 2.01 | 1.81 | 1.84 | 2.06 | 2.30 | 1.86 | - | -    | 0.24 | - | 12.80 |
| 118 | 5.58 | - | - | 3.09 | 3.84 | 3.14 | 3.80 | 0.38 | 6.45 | - | 1.94 | 1.47 | 2.00 | 1.81 | 1.84 | 2.07 | 2.30 | 1.86 | - | -    | 0.25 | - | 12.80 |
| 119 | 5.57 | - | - | 3.09 | 3.84 | 3.14 | 3.81 | 0.39 | 6.43 | - | 1.93 | 1.47 | 2.00 | 1.81 | 1.84 | 2.07 | 2.31 | 1.87 | - | -    | 0.26 | - | 12.81 |
| 120 | 5.57 | - | - | 3.09 | 3.84 | 3.13 | 3.82 | 0.41 | 6.42 | - | 1.92 | 1.47 | 2.00 | 1.81 | 1.84 | 2.08 | 2.31 | 1.86 | - | -    | 0.27 | - | 12.81 |
| 121 | 5.57 | - | - | 6.93 | -    | 3.12 | 3.83 | 0.41 | 6.41 | - | 1.91 | 1.47 | 2.00 | 1.81 | 1.84 | 2.09 | 2.31 | 1.87 | - | -    | 0.27 | - | 12.81 |
| 122 | 5.56 | - | - | 6.94 | -    | 3.10 | 3.84 | 0.43 | 6.39 | - | 1.89 | 1.47 | 1.99 | 1.81 | 1.84 | 2.10 | 2.31 | 1.87 | - | -    | 0.28 | - | 12.81 |
| 123 | 5.56 | - | - | 6.94 | -    | 3.10 | 3.85 | 0.45 | 6.37 | - | 1.88 | 1.47 | 1.99 | 1.81 | 1.84 | 2.11 | 2.32 | 1.87 | - | -    | 0.29 | - | 12.82 |
| 124 | 5.57 | - | - | 6.93 | -    | 3.08 | 3.86 | 0.48 | 6.37 | - | 1.88 | 1.46 | 1.99 | 1.81 | 1.84 | 2.12 | 2.32 | 1.87 | - | -    | 0.24 | - | 12.82 |
| 125 | 5.56 | - | - | 6.93 | -    | 3.08 | 3.86 | 0.50 | 6.38 | - | 1.87 | 1.46 | 1.99 | 1.81 | 1.84 | 2.13 | 2.32 | 1.87 | - | -    | 0.23 | - | 12.82 |
| 126 | 5.56 | - | - | 6.93 | -    | 3.06 | 3.88 | 0.53 | 6.38 | - | 1.86 | 1.46 | 1.98 | 1.81 | 1.84 | 2.15 | 2.32 | 1.87 | - | -    | 0.20 | - | 12.82 |
| 127 | 5.56 | - | - | 6.92 | -    | 3.05 | 3.89 | 0.56 | 6.36 | - | 1.85 | 1.46 | 1.98 | 1.81 | 1.84 | 2.15 | 2.33 | 1.87 | - | -    | 0.19 | - | 12.82 |
| 128 | 5.56 | - | - | 6.92 | -    | 3.04 | 3.90 | 0.64 | 6.36 | - | 1.83 | 1.46 | 1.98 | 1.81 | 1.84 | 2.16 | 2.33 | 1.87 | - | -    | 0.13 | - | 12.83 |
| 129 | 5.56 | - | - | 6.91 | -    | 3.04 | 3.89 | 6.28 | -    | - | 1.81 | 1.46 | 1.97 | 1.81 | 1.84 | 2.17 | 2.33 | 1.87 | - | 0.87 | -    | - | 12.83 |
| 130 | 5.55 | - | - | 6.91 | -    | 3.03 | 3.89 | 6.25 | -    | - | 1.80 | 1.46 | 1.96 | 1.81 | 1.84 | 2.18 | 2.33 | 1.88 | - | 0.89 | -    | - | 12.83 |
| 131 | 5.56 | - | - | 6.91 | -    | 3.06 | 3.87 | 6.23 | -    | - | 1.79 | 1.46 | 1.96 | 1.81 | 1.84 | 2.19 | 2.33 | 1.87 | - | 0.92 | -    | - | 12.84 |
| 132 | 5.56 | - | - | 6.91 | -    | 6.92 | -    | 6.22 | -    | - | 1.78 | 1.46 | 1.95 | 1.81 | 1.84 | 2.19 | 2.34 | 1.87 | - | 0.95 | -    | - | 12.84 |
| 133 | 5.56 | - | - | 6.92 | -    | 6.93 | -    | 6.19 | -    | - | 1.77 | 1.46 | 1.95 | 1.81 | 1.84 | 2.20 | 2.34 | 1.88 | - | 0.97 | -    | - | 12.84 |

|     |      |   |   |      |      |      |      |      |   |   |      |      |      |      |      |      |      |      |   |      |   |   |       |
|-----|------|---|---|------|------|------|------|------|---|---|------|------|------|------|------|------|------|------|---|------|---|---|-------|
| 134 | 5.56 | - | - | 6.91 | -    | 6.93 | -    | 6.17 | - | - | 1.76 | 1.46 | 1.94 | 1.81 | 1.84 | 2.21 | 2.34 | 1.87 | - | 1.00 | - | - | 12.84 |
| 135 | 5.56 | - | - | 6.91 | -    | 6.92 | -    | 6.14 | - | - | 1.74 | 1.46 | 1.94 | 1.81 | 1.84 | 2.21 | 2.34 | 1.87 | - | 1.03 | - | - | 12.85 |
| 136 | 5.55 | - | - | 6.91 | -    | 6.92 | -    | 6.14 | - | - | 1.73 | 1.46 | 1.94 | 1.81 | 1.84 | 2.22 | 2.35 | 1.87 | - | 1.06 | - | - | 12.85 |
| 137 | 5.56 | - | - | 6.92 | -    | 6.92 | -    | 6.10 | - | - | 1.72 | 1.46 | 1.93 | 1.81 | 1.84 | 2.23 | 2.35 | 1.87 | - | 1.09 | - | - | 12.85 |
| 138 | 5.56 | - | - | 6.92 | -    | 6.92 | -    | 6.08 | - | - | 1.71 | 1.46 | 1.93 | 1.81 | 1.84 | 2.24 | 2.35 | 1.88 | - | 1.12 | - | - | 12.85 |
| 139 | 5.55 | - | - | 6.91 | -    | 6.92 | -    | 6.06 | - | - | 1.70 | 1.46 | 1.93 | 1.82 | 1.84 | 2.24 | 2.35 | 1.87 | - | 1.15 | - | - | 12.85 |
| 140 | 5.55 | - | - | 6.91 | -    | 6.92 | -    | 6.03 | - | - | 1.68 | 1.46 | 1.92 | 1.81 | 1.84 | 2.25 | 2.36 | 1.88 | - | 1.18 | - | - | 12.85 |
| 141 | 5.54 | - | - | 6.90 | -    | 6.91 | -    | 6.01 | - | - | 1.67 | 1.46 | 1.92 | 1.82 | 1.84 | 2.25 | 2.36 | 1.88 | - | 1.21 | - | - | 12.85 |
| 142 | 5.54 | - | - | 6.91 | -    | 6.92 | -    | 6.00 | - | - | 1.66 | 1.46 | 1.91 | 1.82 | 1.84 | 2.26 | 2.37 | 1.88 | - | 1.24 | - | - | 12.85 |
| 143 | 5.55 | - | - | 6.91 | -    | 6.92 | -    | 5.98 | - | - | 1.65 | 1.46 | 1.91 | 1.82 | 1.84 | 2.26 | 2.37 | 1.88 | - | 1.28 | - | - | 12.85 |
| 144 | 5.55 | - | - | 6.91 | -    | 6.92 | -    | 5.96 | - | - | 1.64 | 1.46 | 1.91 | 1.82 | 1.83 | 2.27 | 2.37 | 1.87 | - | 1.30 | - | - | 12.85 |
| 145 | 5.55 | - | - | 6.91 | -    | 6.91 | -    | 5.94 | - | - | 1.63 | 1.46 | 1.90 | 1.82 | 1.83 | 2.27 | 2.37 | 1.87 | - | 1.32 | - | - | 12.85 |
| 146 | 5.54 | - | - | 6.91 | -    | 6.91 | -    | 5.92 | - | - | 1.62 | 1.46 | 1.90 | 1.82 | 1.84 | 2.27 | 2.37 | 1.87 | - | 1.35 | - | - | 12.85 |
| 147 | 5.54 | - | - | 6.91 | -    | 6.92 | -    | 5.90 | - | - | 1.62 | 1.47 | 1.90 | 1.82 | 1.84 | 2.28 | 2.37 | 1.87 | - | 1.36 | - | - | 12.85 |
| 148 | 5.55 | - | - | 6.89 | -    | 6.92 | -    | 5.89 | - | - | 1.61 | 1.47 | 1.90 | 1.82 | 1.84 | 2.28 | 2.38 | 1.87 | - | 1.38 | - | - | 12.85 |
| 149 | 5.55 | - | - | 6.90 | -    | 6.92 | -    | 5.88 | - | - | 1.61 | 1.47 | 1.90 | 1.82 | 1.84 | 2.28 | 2.37 | 1.87 | - | 1.39 | - | - | 12.85 |
| 150 | 5.54 | - | - | 6.90 | -    | 3.85 | 3.07 | 5.89 | - | - | 1.61 | 1.47 | 1.90 | 1.82 | 1.83 | 2.28 | 2.38 | 1.87 | - | 1.39 | - | - | 12.85 |
| 151 | 5.56 | - | - | 6.90 | -    | 3.84 | 3.08 | 5.88 | - | - | 1.61 | 1.47 | 1.90 | 1.82 | 1.83 | 2.28 | 2.37 | 1.86 | - | 1.39 | - | - | 12.84 |
| 152 | 5.56 | - | - | 6.90 | -    | 3.83 | 3.09 | 5.88 | - | - | 1.61 | 1.47 | 1.90 | 1.82 | 1.83 | 2.28 | 2.37 | 1.86 | - | 1.40 | - | - | 12.85 |
| 153 | 5.57 | - | - | 6.90 | -    | 3.79 | 3.13 | 5.87 | - | - | 1.61 | 1.47 | 1.90 | 1.82 | 1.83 | 2.28 | 2.37 | 1.86 | - | 1.40 | - | - | 12.84 |
| 154 | 5.57 | - | - | 6.91 | -    | 3.77 | 3.15 | 5.86 | - | - | 1.61 | 1.47 | 1.90 | 1.82 | 1.83 | 2.28 | 2.37 | 1.86 | - | 1.41 | - | - | 12.84 |
| 155 | 5.57 | - | - | 3.80 | 3.11 | 3.75 | 3.17 | 5.86 | - | - | 1.61 | 1.47 | 1.90 | 1.81 | 1.83 | 2.28 | 2.37 | 1.86 | - | 1.42 | - | - | 12.84 |
| 156 | 5.56 | - | - | 3.80 | 3.11 | 3.71 | 3.21 | 5.86 | - | - | 1.61 | 1.47 | 1.90 | 1.81 | 1.83 | 2.28 | 2.37 | 1.86 | - | 1.42 | - | - | 12.84 |
| 157 | 5.57 | - | - | 3.76 | 3.15 | 3.69 | 3.24 | 5.84 | - | - | 1.61 | 1.47 | 1.90 | 1.81 | 1.83 | 2.28 | 2.37 | 1.85 | - | 1.42 | - | - | 12.83 |
| 158 | 5.56 | - | - | 3.73 | 3.19 | 3.68 | 3.26 | 5.85 | - | - | 1.61 | 1.47 | 1.91 | 1.81 | 1.83 | 2.28 | 2.37 | 1.86 | - | 1.42 | - | - | 12.83 |
| 159 | 5.57 | - | - | 3.68 | 3.22 | 3.64 | 3.28 | 5.85 | - | - | 1.61 | 1.47 | 1.90 | 1.81 | 1.83 | 2.28 | 2.37 | 1.86 | - | 1.42 | - | - | 12.83 |
| 160 | 5.57 | - | - | 3.66 | 3.25 | 3.61 | 3.31 | 5.85 | - | - | 1.61 | 1.47 | 1.90 | 1.81 | 1.83 | 2.28 | 2.37 | 1.86 | - | 1.42 | - | - | 12.83 |
| 161 | 5.57 | - | - | 3.63 | 3.27 | 3.60 | 3.33 | 5.86 | - | - | 1.61 | 1.47 | 1.90 | 1.80 | 1.83 | 2.28 | 2.36 | 1.86 | - | 1.42 | - | - | 12.83 |
| 162 | 5.56 | - | - | 3.59 | 3.31 | 3.57 | 3.36 | 5.85 | - | - | 1.61 | 1.48 | 1.90 | 1.81 | 1.83 | 2.28 | 2.37 | 1.86 | - | 1.42 | - | - | 12.83 |
| 163 | 5.56 | - | - | 3.56 | 3.34 | 3.54 | 3.39 | 5.84 | - | - | 1.62 | 1.47 | 1.90 | 1.81 | 1.83 | 2.27 | 2.36 | 1.85 | - | 1.42 | - | - | 12.83 |
| 164 | 5.57 | - | - | 3.54 | 3.35 | 3.52 | 3.41 | 5.83 | - | - | 1.62 | 1.47 | 1.90 | 1.81 | 1.83 | 2.27 | 2.36 | 1.85 | - | 1.43 | - | - | 12.83 |
| 165 | 5.58 | - | - | 3.51 | 3.38 | 3.49 | 3.43 | 5.84 | - | - | 1.61 | 1.47 | 1.90 | 1.82 | 1.83 | 2.28 | 2.36 | 1.85 | - | 1.43 | - | - | 12.83 |
| 166 | 5.58 | - | - | 3.48 | 3.42 | 3.47 | 3.46 | 5.83 | - | - | 1.61 | 1.47 | 1.90 | 1.82 | 1.83 | 2.28 | 2.36 | 1.85 | - | 1.43 | - | - | 12.83 |
| 167 | 5.58 | - | - | 3.46 | 3.45 | 3.45 | 3.49 | 5.82 | - | - | 1.62 | 1.47 | 1.90 | 1.82 | 1.83 | 2.27 | 2.36 | 1.86 | - | 1.43 | - | - | 12.83 |
| 168 | 5.58 | - | - | 3.44 | 3.47 | 3.43 | 3.50 | 5.82 | - | - | 1.62 | 1.48 | 1.90 | 1.82 | 1.83 | 2.27 | 2.36 | 1.86 | - | 1.43 | - | - | 12.83 |

|     |      |   |   |      |      |      |      |      |   |   |      |      |      |      |      |      |      |      |   |      |   |   |       |
|-----|------|---|---|------|------|------|------|------|---|---|------|------|------|------|------|------|------|------|---|------|---|---|-------|
| 169 | 5.58 | - | - | 3.43 | 3.49 | 3.41 | 3.51 | 5.82 | - | - | 1.62 | 1.47 | 1.90 | 1.82 | 1.83 | 2.28 | 2.36 | 1.85 | - | 1.43 | - | - | 12.83 |
| 170 | 5.59 | - | - | 3.40 | 3.51 | 3.40 | 3.54 | 5.81 | - | - | 1.62 | 1.47 | 1.90 | 1.82 | 1.83 | 2.27 | 2.36 | 1.85 | - | 1.43 | - | - | 12.83 |
| 171 | 5.59 | - | - | 3.38 | 3.54 | 3.37 | 3.56 | 5.82 | - | - | 1.62 | 1.47 | 1.89 | 1.82 | 1.83 | 2.27 | 2.36 | 1.85 | - | 1.43 | - | - | 12.83 |
| 172 | 5.59 | - | - | 3.36 | 3.56 | 3.35 | 3.58 | 5.82 | - | - | 1.62 | 1.48 | 1.89 | 1.82 | 1.83 | 2.27 | 2.36 | 1.85 | - | 1.44 | - | - | 12.83 |
| 173 | 5.58 | - | - | 3.34 | 3.57 | 3.35 | 3.59 | 5.82 | - | - | 1.62 | 1.48 | 1.89 | 1.82 | 1.83 | 2.28 | 2.36 | 1.85 | - | 1.44 | - | - | 12.83 |
| 174 | 5.58 | - | - | 3.32 | 3.58 | 3.34 | 3.59 | 5.82 | - | - | 1.62 | 1.48 | 1.90 | 1.82 | 1.83 | 2.27 | 2.36 | 1.85 | - | 1.44 | - | - | 12.83 |
| 175 | 5.59 | - | - | 3.32 | 3.59 | 3.32 | 3.61 | 5.81 | - | - | 1.62 | 1.48 | 1.90 | 1.82 | 1.83 | 2.27 | 2.36 | 1.85 | - | 1.44 | - | - | 12.83 |
| 176 | 5.59 | - | - | 3.30 | 3.61 | 3.32 | 3.61 | 5.81 | - | - | 1.62 | 1.48 | 1.91 | 1.82 | 1.83 | 2.27 | 2.36 | 1.85 | - | 1.44 | - | - | 12.83 |
| 177 | 5.58 | - | - | 3.30 | 3.61 | 3.31 | 3.62 | 5.82 | - | - | 1.62 | 1.48 | 1.91 | 1.81 | 1.83 | 2.27 | 2.35 | 1.85 | - | 1.44 | - | - | 12.83 |
| 178 | 5.58 | - | - | 3.30 | 3.62 | 3.29 | 3.62 | 5.82 | - | - | 1.62 | 1.48 | 1.91 | 1.81 | 1.83 | 2.28 | 2.35 | 1.85 | - | 1.44 | - | - | 12.83 |
| 179 | 5.58 | - | - | 3.29 | 3.63 | 3.29 | 3.62 | 5.82 | - | - | 1.62 | 1.48 | 1.91 | 1.81 | 1.83 | 2.28 | 2.35 | 1.85 | - | 1.44 | - | - | 12.83 |
| 180 | 5.58 | - | - | 3.29 | 3.62 | 3.28 | 3.63 | 5.81 | - | - | 1.62 | 1.48 | 1.91 | 1.81 | 1.83 | 2.28 | 2.35 | 1.85 | - | 1.44 | - | - | 12.83 |
| 181 | 5.58 | - | - | 3.28 | 3.63 | 3.28 | 3.62 | 5.81 | - | - | 1.63 | 1.48 | 1.90 | 1.81 | 1.83 | 2.28 | 2.35 | 1.84 | - | 1.45 | - | - | 12.83 |
| 182 | 5.58 | - | - | 3.27 | 3.64 | 3.29 | 3.62 | 5.82 | - | - | 1.62 | 1.48 | 1.91 | 1.81 | 1.83 | 2.28 | 2.35 | 1.84 | - | 1.45 | - | - | 12.83 |
| 183 | 5.59 | - | - | 3.28 | 3.64 | 3.29 | 3.63 | 5.81 | - | - | 1.62 | 1.48 | 1.90 | 1.81 | 1.83 | 2.28 | 2.35 | 1.85 | - | 1.45 | - | - | 12.83 |
| 184 | 5.59 | - | - | 3.28 | 3.64 | 3.28 | 3.64 | 5.82 | - | - | 1.62 | 1.48 | 1.91 | 1.81 | 1.83 | 2.28 | 2.35 | 1.85 | - | 1.44 | - | - | 12.83 |
| 185 | 5.59 | - | - | 3.27 | 3.64 | 3.29 | 3.63 | 5.82 | - | - | 1.62 | 1.48 | 1.90 | 1.82 | 1.83 | 2.28 | 2.35 | 1.85 | - | 1.44 | - | - | 12.83 |
| 186 | 5.60 | - | - | 3.26 | 3.64 | 3.29 | 3.64 | 5.83 | - | - | 1.62 | 1.47 | 1.91 | 1.82 | 1.83 | 2.29 | 2.35 | 1.84 | - | 1.44 | - | - | 12.83 |
| 187 | 5.59 | - | - | 3.28 | 3.63 | 3.30 | 3.64 | 5.83 | - | - | 1.62 | 1.47 | 1.90 | 1.82 | 1.83 | 2.28 | 2.36 | 1.84 | - | 1.45 | - | - | 12.83 |
| 188 | 5.60 | - | - | 3.27 | 3.64 | 3.29 | 3.64 | 5.81 | - | - | 1.62 | 1.47 | 1.90 | 1.82 | 1.83 | 2.28 | 2.36 | 1.84 | - | 1.44 | - | - | 12.83 |
| 189 | 5.58 | - | - | 3.27 | 3.64 | 3.29 | 3.64 | 5.81 | - | - | 1.62 | 1.47 | 1.90 | 1.82 | 1.83 | 2.28 | 2.35 | 1.84 | - | 1.44 | - | - | 12.83 |
| 190 | 5.58 | - | - | 3.27 | 3.64 | 3.29 | 3.63 | 5.80 | - | - | 1.62 | 1.47 | 1.90 | 1.82 | 1.83 | 2.28 | 2.35 | 1.84 | - | 1.44 | - | - | 12.83 |
| 191 | 5.58 | - | - | 3.26 | 3.63 | 3.29 | 3.64 | 5.81 | - | - | 1.62 | 1.47 | 1.90 | 1.82 | 1.83 | 2.28 | 2.36 | 1.85 | - | 1.44 | - | - | 12.83 |
| 192 | 5.58 | - | - | 3.25 | 3.63 | 3.63 | 3.29 | 5.82 | - | - | 1.62 | 1.48 | 1.90 | 1.82 | 1.83 | 2.28 | 2.36 | 1.85 | - | 1.44 | - | - | 12.83 |
| 193 | 5.58 | - | - | 3.25 | 3.63 | 3.63 | 3.29 | 5.82 | - | - | 1.62 | 1.48 | 1.90 | 1.82 | 1.83 | 2.28 | 2.36 | 1.85 | - | 1.44 | - | - | 12.83 |
| 194 | 5.58 | - | - | 3.25 | 3.63 | 3.63 | 3.29 | 5.82 | - | - | 1.62 | 1.48 | 1.90 | 1.83 | 1.83 | 2.28 | 2.35 | 1.85 | - | 1.44 | - | - | 12.83 |
| 195 | 5.59 | - | - | 3.27 | 3.64 | 3.63 | 3.29 | 5.82 | - | - | 1.62 | 1.48 | 1.90 | 1.83 | 1.83 | 2.28 | 2.35 | 1.85 | - | 1.44 | - | - | 12.83 |
| 196 | 5.59 | - | - | 3.27 | 3.64 | 3.63 | 3.29 | 5.83 | - | - | 1.62 | 1.48 | 1.90 | 1.83 | 1.83 | 2.28 | 2.35 | 1.85 | - | 1.44 | - | - | 12.83 |
| 197 | 5.59 | - | - | 3.26 | 3.65 | 3.63 | 3.29 | 5.83 | - | - | 1.62 | 1.48 | 1.90 | 1.82 | 1.83 | 2.28 | 2.35 | 1.85 | - | 1.44 | - | - | 12.83 |
| 198 | 5.59 | - | - | 3.26 | 3.65 | 3.63 | 3.29 | 5.82 | - | - | 1.62 | 1.48 | 1.90 | 1.82 | 1.83 | 2.28 | 2.35 | 1.85 | - | 1.44 | - | - | 12.83 |
| 199 | 5.59 | - | - | 3.26 | 3.65 | 3.63 | 3.29 | 5.83 | - | - | 1.62 | 1.48 | 1.90 | 1.82 | 1.83 | 2.35 | 2.28 | 1.85 | - | 1.44 | - | - | 12.83 |
| 200 | 5.58 | - | - | 3.26 | 3.65 | 3.63 | 3.30 | 5.83 | - | - | 1.62 | 1.48 | 1.90 | 1.82 | 1.82 | 2.28 | 2.35 | 1.85 | - | 1.44 | - | - | 12.83 |
| 201 | 5.59 | - | - | 3.27 | 3.65 | 3.63 | 3.30 | 5.84 | - | - | 1.62 | 1.48 | 1.90 | 1.82 | 1.83 | 2.28 | 2.35 | 1.85 | - | 1.44 | - | - | 12.83 |
| 202 | 5.58 | - | - | 3.27 | 3.66 | 3.62 | 3.30 | 5.84 | - | - | 1.62 | 1.48 | 1.90 | 1.83 | 1.83 | 2.28 | 2.35 | 1.85 | - | 1.43 | - | - | 12.83 |
| 203 | 5.59 | - | - | 3.27 | 3.65 | 3.62 | 3.30 | 5.84 | - | - | 1.62 | 1.48 | 1.90 | 1.83 | 1.83 | 2.28 | 2.35 | 1.84 | - | 1.43 | - | - | 12.83 |

|     |      |   |   |      |      |      |      |      |   |   |      |      |      |      |      |      |      |      |   |      |   |   |       |
|-----|------|---|---|------|------|------|------|------|---|---|------|------|------|------|------|------|------|------|---|------|---|---|-------|
| 204 | 5.59 | - | - | 3.26 | 3.66 | 3.63 | 3.30 | 5.82 | - | - | 1.62 | 1.48 | 1.90 | 1.83 | 1.83 | 2.28 | 2.35 | 1.85 | - | 1.44 | - | - | 12.83 |
| 205 | 5.59 | - | - | 3.26 | 3.65 | 3.63 | 3.30 | 5.82 | - | - | 1.62 | 1.47 | 1.90 | 1.83 | 1.83 | 2.28 | 2.36 | 1.85 | - | 1.44 | - | - | 12.83 |
| 206 | 5.58 | - | - | 3.64 | 3.27 | 3.63 | 3.29 | 5.83 | - | - | 1.62 | 1.47 | 1.90 | 1.83 | 1.83 | 2.29 | 2.36 | 1.85 | - | 1.44 | - | - | 12.83 |
| 207 | 5.58 | - | - | 3.65 | 3.26 | 3.62 | 3.29 | 5.83 | - | - | 1.62 | 1.47 | 1.90 | 1.83 | 1.83 | 2.29 | 2.36 | 1.85 | - | 1.44 | - | - | 12.83 |
| 208 | 5.58 | - | - | 3.65 | 3.26 | 3.63 | 3.30 | 5.81 | - | - | 1.62 | 1.47 | 1.90 | 1.82 | 1.83 | 2.29 | 2.36 | 1.85 | - | 1.44 | - | - | 12.83 |
| 209 | 5.58 | - | - | 3.65 | 3.26 | 3.63 | 3.30 | 5.81 | - | - | 1.62 | 1.47 | 1.90 | 1.82 | 1.83 | 2.29 | 2.35 | 1.85 | - | 1.44 | - | - | 12.83 |
| 210 | 5.58 | - | - | 3.24 | 3.65 | 3.62 | 3.30 | 5.82 | - | - | 1.62 | 1.47 | 1.90 | 1.82 | 1.84 | 2.29 | 2.35 | 1.85 | - | 1.44 | - | - | 12.83 |
| 211 | 5.58 | - | - | 3.24 | 3.64 | 3.63 | 3.30 | 5.82 | - | - | 1.62 | 1.47 | 1.90 | 1.82 | 1.83 | 2.29 | 2.35 | 1.85 | - | 1.44 | - | - | 12.83 |
| 212 | 5.59 | - | - | 3.24 | 3.64 | 3.62 | 3.30 | 5.82 | - | - | 1.62 | 1.47 | 1.90 | 1.82 | 1.83 | 2.29 | 2.35 | 1.84 | - | 1.45 | - | - | 12.83 |
| 213 | 5.60 | - | - | 3.24 | 3.64 | 3.61 | 3.31 | 5.82 | - | - | 1.61 | 1.47 | 1.90 | 1.82 | 1.83 | 2.29 | 2.35 | 1.84 | - | 1.44 | - | - | 12.83 |
| 214 | 5.59 | - | - | 3.24 | 3.64 | 3.61 | 3.31 | 5.82 | - | - | 1.62 | 1.47 | 1.90 | 1.82 | 1.83 | 2.30 | 2.35 | 1.84 | - | 1.44 | - | - | 12.83 |
| 215 | 5.59 | - | - | 3.25 | 3.66 | 3.62 | 3.30 | 5.81 | - | - | 1.62 | 1.47 | 1.89 | 1.82 | 1.83 | 2.30 | 2.35 | 1.84 | - | 1.44 | - | - | 12.83 |
| 216 | 5.58 | - | - | 3.26 | 3.66 | 3.62 | 3.30 | 5.81 | - | - | 1.62 | 1.47 | 1.89 | 1.82 | 1.83 | 2.30 | 2.35 | 1.84 | - | 1.44 | - | - | 12.83 |
| 217 | 5.58 | - | - | 3.25 | 3.66 | 3.62 | 3.31 | 5.79 | - | - | 1.62 | 1.47 | 1.89 | 1.82 | 1.83 | 2.30 | 2.35 | 1.84 | - | 1.45 | - | - | 12.83 |
| 218 | 5.59 | - | - | 3.25 | 3.66 | 3.61 | 3.32 | 5.79 | - | - | 1.62 | 1.47 | 1.89 | 1.81 | 1.83 | 2.31 | 2.35 | 1.84 | - | 1.45 | - | - | 12.83 |
| 219 | 5.59 | - | - | 3.25 | 3.66 | 3.62 | 3.32 | 5.77 | - | - | 1.62 | 1.47 | 1.89 | 1.82 | 1.83 | 2.30 | 2.35 | 1.85 | - | 1.45 | - | - | 12.83 |
| 220 | 5.58 | - | - | 3.26 | 3.66 | 3.62 | 3.31 | 5.78 | - | - | 1.62 | 1.47 | 1.89 | 1.82 | 1.83 | 2.31 | 2.35 | 1.85 | - | 1.45 | - | - | 12.83 |
| 221 | 5.59 | - | - | 3.26 | 3.66 | 3.62 | 3.32 | 5.78 | - | - | 1.62 | 1.47 | 1.89 | 1.82 | 1.83 | 2.31 | 2.35 | 1.85 | - | 1.45 | - | - | 12.83 |
| 222 | 5.58 | - | - | 3.27 | 3.66 | 3.62 | 3.31 | 5.80 | - | - | 1.62 | 1.46 | 1.89 | 1.82 | 1.83 | 2.31 | 2.35 | 1.85 | - | 1.44 | - | - | 12.83 |
| 223 | 5.59 | - | - | 3.28 | 3.65 | 3.61 | 3.31 | 5.80 | - | - | 1.62 | 1.46 | 1.89 | 1.82 | 1.83 | 2.31 | 2.35 | 1.85 | - | 1.44 | - | - | 12.83 |
| 224 | 5.59 | - | - | 3.26 | 3.66 | 3.61 | 3.31 | 5.80 | - | - | 1.62 | 1.46 | 1.89 | 1.82 | 1.83 | 2.31 | 2.35 | 1.85 | - | 1.44 | - | - | 12.83 |
| 225 | 5.60 | - | - | 3.26 | 3.65 | 3.61 | 3.31 | 5.81 | - | - | 1.62 | 1.47 | 1.89 | 1.82 | 1.83 | 2.31 | 2.35 | 1.85 | - | 1.45 | - | - | 12.83 |
| 226 | 5.59 | - | - | 3.25 | 3.66 | 3.61 | 3.31 | 5.80 | - | - | 1.61 | 1.47 | 1.89 | 1.82 | 1.83 | 2.31 | 2.35 | 1.85 | - | 1.45 | - | - | 12.83 |
| 227 | 5.60 | - | - | 3.25 | 3.66 | 3.61 | 3.31 | 5.80 | - | - | 1.62 | 1.47 | 1.89 | 1.82 | 1.83 | 2.31 | 2.35 | 1.85 | - | 1.45 | - | - | 12.83 |
| 228 | 5.59 | - | - | 3.24 | 3.67 | 3.61 | 3.31 | 5.80 | - | - | 1.61 | 1.47 | 1.89 | 1.82 | 1.83 | 2.32 | 2.35 | 1.85 | - | 1.45 | - | - | 12.83 |
| 229 | 5.59 | - | - | 3.24 | 3.67 | 3.62 | 3.31 | 5.79 | - | - | 1.61 | 1.47 | 1.89 | 1.82 | 1.83 | 2.32 | 2.35 | 1.85 | - | 1.45 | - | - | 12.83 |
| 230 | 5.59 | - | - | 3.24 | 3.67 | 3.62 | 3.32 | 5.80 | - | - | 1.61 | 1.46 | 1.89 | 1.82 | 1.83 | 2.32 | 2.35 | 1.86 | - | 1.45 | - | - | 12.83 |

ELF analysis for oxidation of pyrrolidine **R4**

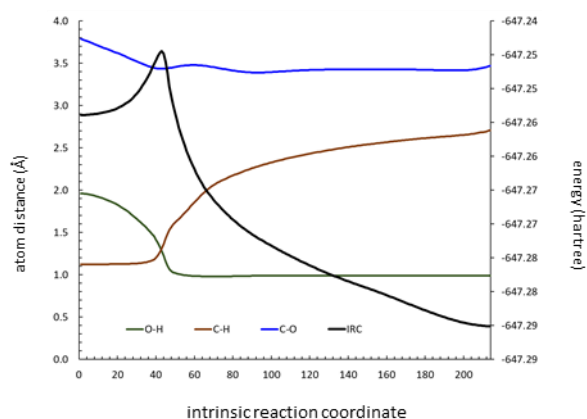

Figure S5. IRC analysis of the formation of **IN4a**.

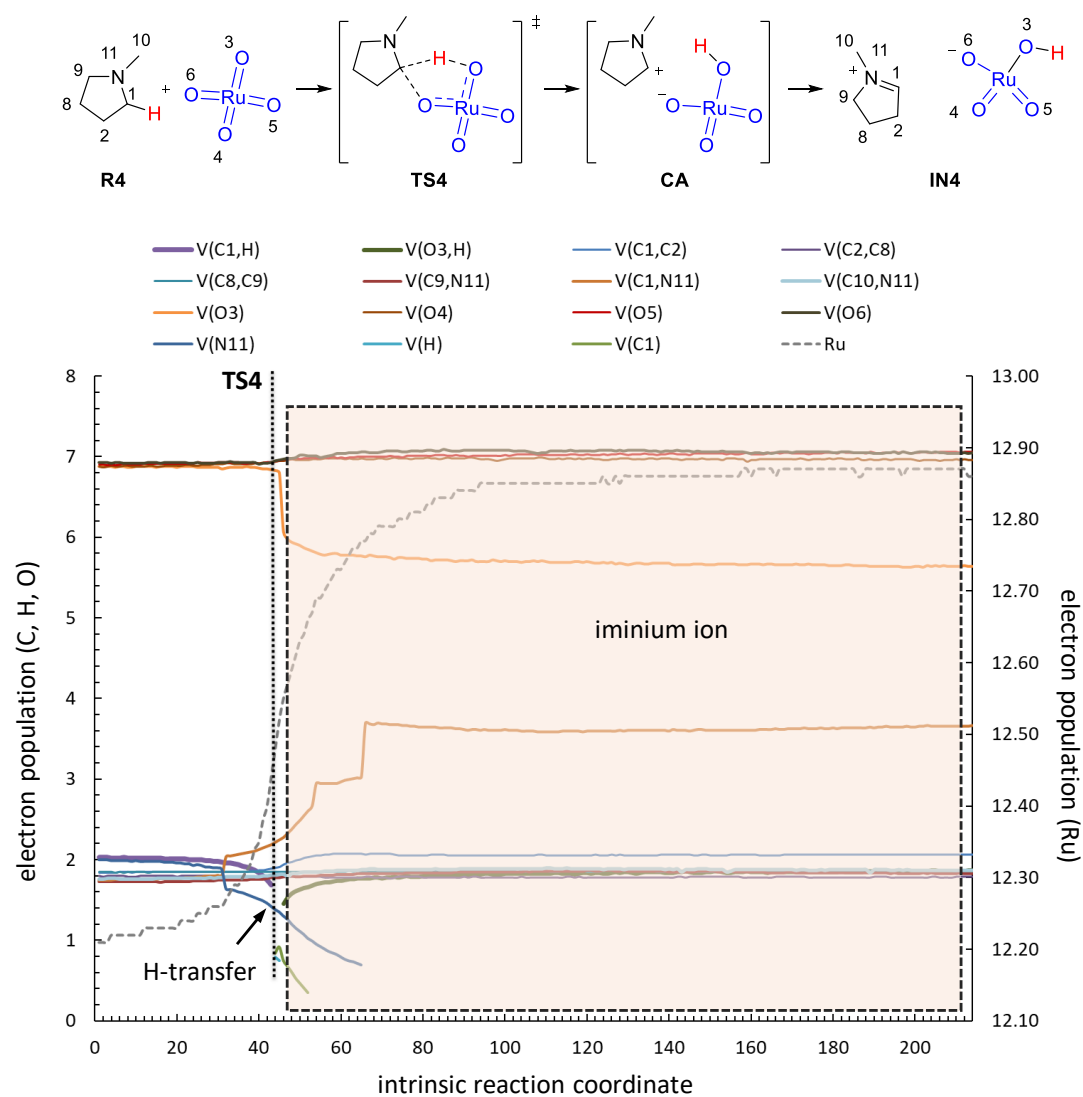

Figure S6. ELF analysis of the formation of **4a..**



**Table S14.** ELF basin populations for the oxidation of **R4** to give **IN4a**

|    | V1(O3) | V2(O3) | V3(O3) | V1(O4) | V2(O4) | V1(O5) | V2(O5) | V1(O6) | V2(O6) | V1(C1,N11) | V2(C1,N11) | V(C9,N11) | V(C1,C2) | V(C2,C8) | V(C8,C9) | V(C10,N11) | V1(N11) | V2(N11) | V(O3,H) | V(C1,H) | V(C1) | V(H) | Ru    |
|----|--------|--------|--------|--------|--------|--------|--------|--------|--------|------------|------------|-----------|----------|----------|----------|------------|---------|---------|---------|---------|-------|------|-------|
| 1  | 6.88   | -      | -      | 6.88   | -      | 6.90   | -      | 5.39   | 1.54   | 1.75       | -          | 1.73      | 1.84     | 1.80     | 1.85     | 1.76       | 1.76    | 0.24    | -       | 2.03    | -     | -    | 12.21 |
| 2  | 6.88   | -      | -      | 6.87   | -      | 6.90   | -      | 5.40   | 1.53   | 1.75       | -          | 1.73      | 1.84     | 1.79     | 1.85     | 1.76       | 1.76    | 0.24    | -       | 2.03    | -     | -    | 12.21 |
| 3  | 6.88   | -      | -      | 6.88   | -      | 6.89   | -      | 5.41   | 1.52   | 1.75       | -          | 1.73      | 1.84     | 1.80     | 1.85     | 1.77       | 1.76    | 0.24    | -       | 2.03    | -     | -    | 12.21 |
| 4  | 6.88   | -      | -      | 6.89   | -      | 6.90   | -      | 5.41   | 1.51   | 1.75       | -          | 1.73      | 1.84     | 1.80     | 1.85     | 1.77       | 1.76    | 0.23    | -       | 2.02    | -     | -    | 12.22 |
| 5  | 6.87   | -      | -      | 6.88   | -      | 6.89   | -      | 5.39   | 1.54   | 1.76       | -          | 1.73      | 1.84     | 1.80     | 1.84     | 1.77       | 1.76    | 0.23    | -       | 2.02    | -     | -    | 12.22 |
| 6  | 6.88   | -      | -      | 6.88   | -      | 6.90   | -      | 5.39   | 1.54   | 1.76       | -          | 1.73      | 1.85     | 1.80     | 1.85     | 1.76       | 1.76    | 0.23    | -       | 2.02    | -     | -    | 12.22 |
| 7  | 6.88   | -      | -      | 6.89   | -      | 6.91   | -      | 5.38   | 1.54   | 1.76       | -          | 1.73      | 1.85     | 1.80     | 1.84     | 1.76       | 1.76    | 0.23    | -       | 2.03    | -     | -    | 12.22 |
| 8  | 6.87   | -      | -      | 6.89   | -      | 6.90   | -      | 5.38   | 1.54   | 1.76       | -          | 1.73      | 1.85     | 1.79     | 1.85     | 1.76       | 1.76    | 0.23    | -       | 2.02    | -     | -    | 12.22 |
| 9  | 6.87   | -      | -      | 6.88   | -      | 6.90   | -      | 5.38   | 1.54   | 1.76       | -          | 1.73      | 1.84     | 1.79     | 1.85     | 1.76       | 1.75    | 0.23    | -       | 2.02    | -     | -    | 12.22 |
| 10 | 6.88   | -      | -      | 6.88   | -      | 6.90   | -      | 5.40   | 1.52   | 1.76       | -          | 1.73      | 1.85     | 1.79     | 1.85     | 1.76       | 1.76    | 0.23    | -       | 2.02    | -     | -    | 12.22 |
| 11 | 6.88   | -      | -      | 6.88   | -      | 6.90   | -      | 5.41   | 1.51   | 1.76       | -          | 1.73      | 1.85     | 1.80     | 1.85     | 1.76       | 1.75    | 0.23    | -       | 2.02    | -     | -    | 12.22 |
| 12 | 6.88   | -      | -      | 6.88   | -      | 6.91   | -      | 5.42   | 1.50   | 1.76       | -          | 1.73      | 1.85     | 1.80     | 1.85     | 1.76       | 1.75    | 0.23    | -       | 2.02    | -     | -    | 12.23 |
| 13 | 6.88   | -      | -      | 6.89   | -      | 6.91   | -      | 5.43   | 1.50   | 1.76       | -          | 1.73      | 1.85     | 1.80     | 1.84     | 1.76       | 1.75    | 0.23    | -       | 2.02    | -     | -    | 12.23 |
| 14 | 6.88   | -      | -      | 6.89   | -      | 6.91   | -      | 5.43   | 1.50   | 1.76       | -          | 1.73      | 1.85     | 1.80     | 1.85     | 1.76       | 1.74    | 0.24    | -       | 2.02    | -     | -    | 12.23 |
| 15 | 6.87   | -      | -      | 6.88   | -      | 6.91   | -      | 5.43   | 1.50   | 1.76       | -          | 1.73      | 1.85     | 1.80     | 1.85     | 1.77       | 1.74    | 0.24    | -       | 2.02    | -     | -    | 12.23 |
| 16 | 6.88   | -      | -      | 6.88   | -      | 6.91   | -      | 5.44   | 1.48   | 1.77       | -          | 1.72      | 1.85     | 1.80     | 1.85     | 1.77       | 1.74    | 0.24    | -       | 2.02    | -     | -    | 12.23 |
| 17 | 6.88   | -      | -      | 6.89   | -      | 4.82   | 2.09   | 5.45   | 1.48   | 1.77       | -          | 1.73      | 1.85     | 1.80     | 1.85     | 1.77       | 1.73    | 0.24    | -       | 2.01    | -     | -    | 12.23 |
| 18 | 6.88   | -      | -      | 6.89   | -      | 4.62   | 2.29   | 5.41   | 1.52   | 1.77       | -          | 1.73      | 1.85     | 1.80     | 1.85     | 1.77       | 1.73    | 0.24    | -       | 2.01    | -     | -    | 12.23 |
| 19 | 6.88   | -      | -      | 6.89   | -      | 2.42   | 4.49   | 5.37   | 1.56   | 1.77       | -          | 1.73      | 1.85     | 1.80     | 1.85     | 1.77       | 1.73    | 0.24    | -       | 2.01    | -     | -    | 12.23 |
| 20 | 6.87   | -      | -      | 4.95   | 1.94   | 2.50   | 4.41   | 5.22   | 1.71   | 1.77       | -          | 1.73      | 1.85     | 1.79     | 1.85     | 1.77       | 1.72    | 0.24    | -       | 2.01    | -     | -    | 12.23 |
| 21 | 6.88   | -      | -      | 4.74   | 2.15   | 2.67   | 4.24   | 5.25   | 1.68   | 1.77       | -          | 1.73      | 1.85     | 1.80     | 1.85     | 1.77       | 1.72    | 0.24    | -       | 2.01    | -     | -    | 12.24 |
| 22 | 6.88   | -      | -      | 4.56   | 2.34   | 2.75   | 4.16   | 5.06   | 1.87   | 1.78       | -          | 1.73      | 1.85     | 1.80     | 1.85     | 1.77       | 0.24    | 1.71    | -       | 2.01    | -     | -    | 12.24 |
| 23 | 6.88   | -      | -      | 4.48   | 2.42   | 2.81   | 4.10   | 4.73   | 2.19   | 1.78       | -          | 1.73      | 1.85     | 1.80     | 1.85     | 1.77       | 1.71    | 0.24    | -       | 2.00    | -     | -    | 12.24 |
| 24 | 6.88   | -      | -      | 4.35   | 2.54   | 2.86   | 4.05   | 4.54   | 2.38   | 1.78       | -          | 1.74      | 1.85     | 1.80     | 1.85     | 1.77       | 1.70    | 0.23    | -       | 2.00    | -     | -    | 12.24 |
| 25 | 6.87   | -      | -      | 4.30   | 2.59   | 2.92   | 4.01   | 4.41   | 2.52   | 1.79       | -          | 1.74      | 1.85     | 1.80     | 1.85     | 1.77       | 1.70    | 0.24    | -       | 2.00    | -     | -    | 12.25 |
| 26 | 6.87   | -      | -      | 4.25   | 2.65   | 2.99   | 3.93   | 4.31   | 2.61   | 1.79       | -          | 1.74      | 1.85     | 1.80     | 1.85     | 1.77       | 1.69    | 0.24    | -       | 2.00    | -     | -    | 12.25 |
| 27 | 6.87   | -      | -      | 4.22   | 2.68   | 3.01   | 3.91   | 4.20   | 2.72   | 1.80       | -          | 1.74      | 1.85     | 1.80     | 1.85     | 1.77       | 0.23    | 1.68    | -       | 1.99    | -     | -    | 12.25 |
| 28 | 6.87   | -      | -      | 4.15   | 2.75   | 3.03   | 3.89   | 4.11   | 2.81   | 1.80       | -          | 1.74      | 1.85     | 1.80     | 1.85     | 1.78       | 0.24    | 1.67    | -       | 1.99    | -     | -    | 12.26 |

|    |      |      |      |      |      |      |      |      |      |      |   |      |      |      |      |      |      |      |      |      |      |      |       |
|----|------|------|------|------|------|------|------|------|------|------|---|------|------|------|------|------|------|------|------|------|------|------|-------|
| 29 | 6.87 | -    | -    | 4.12 | 2.79 | 3.07 | 3.85 | 4.03 | 2.89 | 1.80 | - | 1.74 | 1.85 | 1.80 | 1.85 | 1.77 | 1.66 | 0.24 | -    | 1.98 | -    | -    | 12.26 |
| 30 | 6.87 | -    | -    | 4.12 | 2.79 | 3.08 | 3.85 | 3.97 | 2.96 | 1.81 | - | 1.75 | 1.85 | 1.80 | 1.85 | 1.78 | 1.66 | 0.24 | -    | 1.98 | -    | -    | 12.26 |
| 31 | 6.85 | -    | -    | 4.12 | 2.79 | 3.11 | 3.82 | 3.91 | 3.02 | 1.81 | - | 1.75 | 1.85 | 1.80 | 1.85 | 1.78 | 1.65 | 0.23 | -    | 1.97 | -    | -    | 12.26 |
| 32 | 6.86 | -    | -    | 4.12 | 2.80 | 3.79 | 3.14 | 3.86 | 3.07 | 2.04 | - | 1.75 | 1.85 | 1.79 | 1.85 | 1.79 | 1.64 | -    | -    | 1.96 | -    | -    | 12.27 |
| 33 | 6.87 | -    | -    | 4.13 | 2.79 | 3.12 | 3.80 | 3.82 | 3.12 | 2.05 | - | 1.75 | 1.85 | 1.79 | 1.85 | 1.79 | 1.63 | -    | -    | 1.96 | -    | -    | 12.28 |
| 34 | 6.87 | -    | -    | 4.12 | 2.79 | 3.14 | 3.79 | 3.77 | 3.16 | 2.06 | - | 1.75 | 1.85 | 1.79 | 1.85 | 1.79 | 1.62 | -    | -    | 1.95 | -    | -    | 12.29 |
| 35 | 6.87 | -    | -    | 4.12 | 2.79 | 3.14 | 3.79 | 3.74 | 3.19 | 2.07 | - | 1.75 | 1.85 | 1.79 | 1.85 | 1.79 | 1.60 | -    | -    | 1.94 | -    | -    | 12.29 |
| 36 | 6.87 | -    | -    | 4.09 | 2.82 | 3.13 | 3.78 | 3.72 | 3.21 | 2.08 | - | 1.75 | 1.85 | 1.79 | 1.85 | 1.79 | 1.59 | -    | -    | 1.92 | -    | -    | 12.3  |
| 37 | 6.88 | -    | -    | 4.05 | 2.86 | 3.14 | 3.77 | 3.69 | 3.24 | 2.09 | - | 1.75 | 1.85 | 1.79 | 1.85 | 1.79 | 1.57 | -    | -    | 1.91 | -    | -    | 12.31 |
| 38 | 6.87 | -    | -    | 4.04 | 2.87 | 3.14 | 3.78 | 3.66 | 3.27 | 2.10 | - | 1.76 | 1.86 | 1.79 | 1.85 | 1.79 | 1.55 | -    | -    | 1.89 | -    | -    | 12.32 |
| 39 | 6.87 | -    | -    | 4.04 | 2.88 | 3.14 | 3.78 | 3.64 | 3.29 | 2.11 | - | 1.76 | 1.86 | 1.79 | 1.85 | 1.79 | 1.53 | -    | -    | 1.87 | -    | -    | 12.34 |
| 40 | 6.86 | -    | -    | 4.02 | 2.90 | 3.13 | 3.78 | 3.61 | 3.30 | 2.13 | - | 1.76 | 1.87 | 1.79 | 1.85 | 1.79 | 1.51 | -    | -    | 1.84 | -    | -    | 12.35 |
| 41 | 3.14 | 3.71 | -    | 4.01 | 2.92 | 3.13 | 3.79 | 3.59 | 3.33 | 2.15 | - | 1.76 | 1.87 | 1.79 | 1.85 | 1.80 | 1.49 | -    | -    | 1.80 | -    | -    | 12.38 |
| 42 | 3.21 | 3.64 | -    | 3.97 | 2.96 | 3.14 | 3.79 | 3.57 | 3.35 | 2.17 | - | 1.77 | 1.88 | 1.79 | 1.85 | 1.80 | 1.46 | -    | -    | 1.75 | -    | -    | 12.4  |
| 43 | 2.91 | 3.57 | 0.36 | 3.93 | 3.00 | 3.15 | 3.78 | 3.56 | 3.37 | 2.19 | - | 1.78 | 1.89 | 1.79 | 1.85 | 1.81 | 1.42 | -    | -    | 1.69 | -    | -    | 12.44 |
| 44 | 6.33 | 0.50 | -    | 3.89 | 3.05 | 3.17 | 3.77 | 3.56 | 3.39 | 2.22 | - | 1.78 | 1.90 | 1.79 | 1.85 | 1.81 | 1.38 | -    | -    | -    | 0.84 | 0.79 | 12.48 |
| 45 | 4.64 | 2.16 | -    | 3.85 | 3.10 | 3.21 | 3.74 | 3.56 | 3.40 | 2.25 | - | 1.78 | 1.91 | 1.79 | 1.85 | 1.82 | 1.35 | -    | -    | -    | 0.92 | 0.75 | 12.52 |
| 46 | 6.07 | -    | -    | 3.80 | 3.15 | 3.25 | 3.71 | 3.57 | 3.40 | 2.28 | - | 1.79 | 1.94 | 1.79 | 1.85 | 1.82 | 1.30 | -    | 1.45 | -    | 0.75 | -    | 12.55 |
| 47 | 5.98 | -    | -    | 3.77 | 3.19 | 3.28 | 3.69 | 3.57 | 3.41 | 2.33 | - | 1.79 | 1.96 | 1.79 | 1.85 | 1.79 | 1.26 | -    | 1.53 | -    | 0.68 | -    | 12.57 |
| 48 | 5.94 | -    | -    | 3.74 | 3.23 | 3.30 | 3.67 | 3.58 | 3.40 | 2.38 | - | 1.80 | 1.97 | 1.79 | 1.85 | 1.83 | 1.20 | -    | 1.58 | -    | 0.61 | -    | 12.59 |
| 49 | 5.92 | -    | -    | 3.72 | 3.24 | 3.32 | 3.66 | 3.58 | 3.41 | 2.44 | - | 1.79 | 1.99 | 1.79 | 1.85 | 1.83 | 1.15 | -    | 1.61 | -    | 0.53 | -    | 12.61 |
| 50 | 5.90 | -    | -    | 3.70 | 3.26 | 3.33 | 3.64 | 3.60 | 3.42 | 2.49 | - | 1.79 | 2.00 | 1.79 | 1.85 | 1.84 | 1.11 | -    | 1.63 | -    | 0.47 | -    | 12.63 |
| 51 | 5.87 | -    | -    | 3.70 | 3.26 | 3.34 | 3.64 | 3.60 | 3.42 | 2.55 | - | 1.80 | 2.02 | 1.79 | 1.85 | 1.85 | 1.07 | -    | 1.65 | -    | 0.41 | -    | 12.64 |
| 52 | 5.85 | -    | -    | 3.68 | 3.28 | 3.35 | 3.63 | 3.59 | 3.42 | 2.61 | - | 1.80 | 2.03 | 1.79 | 1.85 | 1.85 | 1.02 | -    | 1.66 | -    | 0.35 | -    | 12.66 |
| 53 | 5.83 | -    | -    | 3.66 | 3.31 | 3.37 | 3.62 | 3.59 | 3.42 | 2.67 | - | 1.80 | 2.04 | 1.79 | 1.85 | 1.85 | 0.99 | -    | 1.68 | -    | -    | -    | 12.67 |
| 54 | 5.81 | -    | -    | 3.65 | 3.32 | 3.37 | 3.61 | 3.60 | 3.41 | 2.95 | - | 1.80 | 2.05 | 1.79 | 1.85 | 1.85 | 0.95 | -    | 1.70 | -    | -    | -    | 12.69 |
| 55 | 5.79 | -    | -    | 3.63 | 3.34 | 3.38 | 3.60 | 3.59 | 3.40 | 2.95 | - | 1.81 | 2.05 | 1.79 | 1.85 | 1.85 | 0.92 | -    | 1.71 | -    | -    | -    | 12.69 |
| 56 | 2.76 | 3.02 | -    | 3.62 | 3.36 | 3.39 | 3.60 | 3.61 | 3.39 | 2.95 | - | 1.81 | 2.06 | 1.78 | 1.85 | 1.86 | 0.89 | -    | 1.72 | -    | -    | -    | 12.7  |
| 57 | 2.87 | 2.92 | -    | 3.62 | 3.36 | 3.40 | 3.58 | 3.62 | 3.39 | 2.95 | - | 1.81 | 2.06 | 1.78 | 1.85 | 1.86 | 0.86 | -    | 1.72 | -    | -    | -    | 12.71 |
| 58 | 2.96 | 2.84 | -    | 3.61 | 3.37 | 3.41 | 3.59 | 3.63 | 3.39 | 2.95 | - | 1.81 | 2.07 | 1.78 | 1.85 | 1.86 | 0.84 | -    | 1.73 | -    | -    | -    | 12.72 |
| 59 | 3.03 | 2.77 | -    | 3.61 | 3.37 | 3.41 | 3.57 | 3.65 | 3.39 | 2.95 | - | 1.82 | 2.07 | 1.78 | 1.85 | 1.87 | 0.82 | -    | 1.74 | -    | -    | -    | 12.73 |
| 60 | 3.07 | 2.71 | -    | 3.60 | 3.38 | 3.42 | 3.57 | 3.66 | 3.38 | 2.97 | - | 1.82 | 2.07 | 1.78 | 1.85 | 1.87 | 0.79 | -    | 1.74 | -    | -    | -    | 12.73 |
| 61 | 3.12 | 2.66 | -    | 3.58 | 3.39 | 3.41 | 3.57 | 3.66 | 3.38 | 2.99 | - | 1.82 | 2.07 | 1.78 | 1.85 | 1.87 | 0.76 | -    | 1.75 | -    | -    | -    | 12.74 |
| 62 | 3.14 | 2.64 | -    | 3.57 | 3.41 | 3.43 | 3.56 | 3.67 | 3.38 | 3.00 | - | 1.82 | 2.07 | 1.78 | 1.86 | 1.87 | 0.74 | -    | 1.76 | -    | -    | -    | 12.75 |
| 63 | 3.14 | 2.64 | -    | 3.56 | 3.41 | 3.43 | 3.56 | 3.67 | 3.38 | 3.01 | - | 1.82 | 2.07 | 1.78 | 1.85 | 1.87 | 0.73 | -    | 1.76 | -    | -    | -    | 12.76 |

|    |      |      |   |      |      |      |      |      |      |      |      |      |      |      |      |      |      |   |      |   |   |   |       |
|----|------|------|---|------|------|------|------|------|------|------|------|------|------|------|------|------|------|---|------|---|---|---|-------|
| 64 | 3.15 | 2.62 | - | 3.55 | 3.42 | 3.43 | 3.57 | 3.67 | 3.38 | 3.02 | -    | 1.83 | 2.07 | 1.78 | 1.86 | 1.87 | 0.71 | - | 1.77 | - | - | - | 12.76 |
| 65 | 3.18 | 2.59 | - | 3.55 | 3.43 | 3.44 | 3.56 | 3.68 | 3.38 | 3.03 | -    | 1.83 | 2.07 | 1.78 | 1.85 | 1.88 | 0.69 | - | 1.77 | - | - | - | 12.77 |
| 66 | 3.19 | 2.57 | - | 3.53 | 3.44 | 3.44 | 3.56 | 3.68 | 3.38 | 3.70 | -    | 1.83 | 2.06 | 1.79 | 1.85 | 1.88 | -    | - | 1.77 | - | - | - | 12.77 |
| 67 | 3.22 | 2.56 | - | 3.53 | 3.44 | 3.44 | 3.56 | 3.67 | 3.38 | 3.69 | -    | 1.83 | 2.07 | 1.79 | 1.85 | 1.89 | -    | - | 1.77 | - | - | - | 12.78 |
| 68 | 3.21 | 2.56 | - | 3.52 | 3.45 | 3.44 | 3.56 | 3.68 | 3.37 | 3.68 | -    | 1.83 | 2.07 | 1.78 | 1.85 | 1.89 | -    | - | 1.78 | - | - | - | 12.78 |
| 69 | 3.20 | 2.56 | - | 3.52 | 3.46 | 3.44 | 3.56 | 3.68 | 3.37 | 1.75 | 1.95 | 1.83 | 2.07 | 1.78 | 1.85 | 1.88 | -    | - | 1.78 | - | - | - | 12.79 |
| 70 | 3.20 | 2.56 | - | 3.52 | 3.46 | 3.45 | 3.55 | 3.68 | 3.38 | 1.77 | 1.92 | 1.83 | 2.07 | 1.78 | 1.85 | 1.88 | -    | - | 1.77 | - | - | - | 12.79 |
| 71 | 3.20 | 2.56 | - | 3.51 | 3.46 | 3.45 | 3.55 | 3.69 | 3.38 | 1.79 | 1.90 | 1.83 | 2.07 | 1.78 | 1.85 | 1.88 | -    | - | 1.78 | - | - | - | 12.79 |
| 72 | 3.19 | 2.56 | - | 3.51 | 3.47 | 3.46 | 3.55 | 3.69 | 3.38 | 1.80 | 1.88 | 1.83 | 2.07 | 1.77 | 1.85 | 1.88 | -    | - | 1.78 | - | - | - | 12.79 |
| 73 | 3.18 | 2.55 | - | 3.52 | 3.47 | 3.45 | 3.55 | 3.69 | 3.38 | 1.81 | 1.87 | 1.83 | 2.06 | 1.78 | 1.85 | 1.88 | -    | - | 1.79 | - | - | - | 12.79 |
| 74 | 3.19 | 2.56 | - | 3.51 | 3.47 | 3.45 | 3.55 | 3.70 | 3.37 | 1.81 | 1.87 | 1.83 | 2.05 | 1.79 | 1.85 | 1.88 | -    | - | 1.78 | - | - | - | 12.8  |
| 75 | 3.18 | 2.57 | - | 3.52 | 3.46 | 3.45 | 3.54 | 3.69 | 3.37 | 1.80 | 1.87 | 1.83 | 2.05 | 1.79 | 1.85 | 1.88 | -    | - | 1.79 | - | - | - | 12.8  |
| 76 | 3.18 | 2.56 | - | 3.53 | 3.45 | 3.45 | 3.56 | 3.70 | 3.36 | 1.80 | 1.87 | 1.84 | 2.05 | 1.79 | 1.85 | 1.88 | -    | - | 1.80 | - | - | - | 12.8  |
| 77 | 3.18 | 2.56 | - | 3.53 | 3.44 | 3.45 | 3.56 | 3.70 | 3.37 | 1.79 | 1.87 | 1.84 | 2.05 | 1.79 | 1.85 | 1.88 | -    | - | 1.79 | - | - | - | 12.81 |
| 78 | 3.17 | 2.57 | - | 3.55 | 3.43 | 3.44 | 3.57 | 3.71 | 3.36 | 1.79 | 1.87 | 1.84 | 2.05 | 1.79 | 1.85 | 1.88 | -    | - | 1.79 | - | - | - | 12.81 |
| 79 | 3.17 | 2.57 | - | 3.56 | 3.42 | 3.44 | 3.57 | 3.71 | 3.36 | 1.78 | 1.87 | 1.84 | 2.05 | 1.79 | 1.86 | 1.88 | -    | - | 1.79 | - | - | - | 12.81 |
| 80 | 3.16 | 2.57 | - | 3.58 | 3.40 | 3.43 | 3.58 | 3.71 | 3.36 | 1.78 | 1.87 | 1.84 | 2.05 | 1.78 | 1.86 | 1.88 | -    | - | 1.80 | - | - | - | 12.81 |
| 81 | 3.16 | 2.57 | - | 3.59 | 3.40 | 3.43 | 3.58 | 3.72 | 3.36 | 1.78 | 1.87 | 1.84 | 2.05 | 1.78 | 1.85 | 1.88 | -    | - | 1.81 | - | - | - | 12.82 |
| 82 | 3.16 | 2.55 | - | 3.59 | 3.39 | 3.42 | 3.59 | 3.72 | 3.36 | 1.78 | 1.87 | 1.84 | 2.06 | 1.78 | 1.85 | 1.88 | -    | - | 1.81 | - | - | - | 12.82 |
| 83 | 3.15 | 2.57 | - | 3.61 | 3.37 | 3.42 | 3.60 | 3.72 | 3.35 | 1.78 | 1.87 | 1.84 | 2.06 | 1.78 | 1.86 | 1.89 | -    | - | 1.81 | - | - | - | 12.83 |
| 84 | 3.15 | 2.57 | - | 3.61 | 3.36 | 3.42 | 3.60 | 3.73 | 3.34 | 1.78 | 1.86 | 1.84 | 2.06 | 1.78 | 1.86 | 1.88 | -    | - | 1.80 | - | - | - | 12.83 |
| 85 | 3.15 | 2.57 | - | 3.63 | 3.35 | 3.40 | 3.62 | 3.74 | 3.35 | 1.78 | 1.86 | 1.84 | 2.06 | 1.78 | 1.86 | 1.88 | -    | - | 1.80 | - | - | - | 12.83 |
| 86 | 3.15 | 2.57 | - | 3.64 | 3.35 | 3.40 | 3.61 | 3.74 | 3.34 | 1.78 | 1.86 | 1.84 | 2.05 | 1.78 | 1.85 | 1.88 | -    | - | 1.81 | - | - | - | 12.83 |
| 87 | 3.15 | 2.56 | - | 3.64 | 3.34 | 3.40 | 3.61 | 3.74 | 3.33 | 1.78 | 1.86 | 1.84 | 2.05 | 1.78 | 1.85 | 1.88 | -    | - | 1.81 | - | - | - | 12.83 |
| 88 | 3.15 | 2.55 | - | 3.66 | 3.32 | 3.40 | 3.62 | 3.74 | 3.33 | 1.78 | 1.85 | 1.85 | 2.05 | 1.78 | 1.85 | 1.88 | -    | - | 1.82 | - | - | - | 12.84 |
| 89 | 3.16 | 2.55 | - | 3.67 | 3.31 | 3.39 | 3.62 | 3.74 | 3.33 | 1.78 | 1.85 | 1.85 | 2.05 | 1.78 | 1.86 | 1.89 | -    | - | 1.82 | - | - | - | 12.84 |
| 90 | 3.15 | 2.56 | - | 3.68 | 3.30 | 3.39 | 3.62 | 3.75 | 3.33 | 1.77 | 1.85 | 1.85 | 2.05 | 1.79 | 1.86 | 1.89 | -    | - | 1.81 | - | - | - | 12.84 |
| 91 | 3.14 | 2.57 | - | 3.69 | 3.30 | 3.38 | 3.62 | 3.76 | 3.32 | 1.77 | 1.84 | 1.85 | 2.05 | 1.78 | 1.86 | 1.89 | -    | - | 1.81 | - | - | - | 12.84 |
| 92 | 3.16 | 2.56 | - | 3.70 | 3.29 | 3.38 | 3.63 | 3.76 | 3.32 | 1.78 | 1.84 | 1.85 | 2.05 | 1.79 | 1.86 | 1.89 | -    | - | 1.82 | - | - | - | 12.84 |
| 93 | 3.16 | 2.54 | - | 3.71 | 3.27 | 3.38 | 3.63 | 3.76 | 3.32 | 1.78 | 1.84 | 1.85 | 2.05 | 1.79 | 1.86 | 1.89 | -    | - | 1.82 | - | - | - | 12.84 |
| 94 | 3.16 | 2.54 | - | 3.71 | 3.26 | 3.38 | 3.63 | 3.76 | 3.32 | 1.77 | 1.84 | 1.85 | 2.05 | 1.78 | 1.86 | 1.89 | -    | - | 1.82 | - | - | - | 12.85 |
| 95 | 3.17 | 2.53 | - | 3.73 | 3.24 | 3.38 | 3.63 | 3.31 | 3.77 | 1.78 | 1.84 | 1.85 | 2.05 | 1.78 | 1.86 | 1.89 | -    | - | 1.83 | - | - | - | 12.85 |
| 96 | 3.17 | 2.53 | - | 3.73 | 3.24 | 3.38 | 3.63 | 3.31 | 3.77 | 1.78 | 1.83 | 1.85 | 2.05 | 1.78 | 1.86 | 1.89 | -    | - | 1.83 | - | - | - | 12.85 |
| 97 | 3.18 | 2.54 | - | 3.73 | 3.23 | 3.38 | 3.63 | 3.31 | 3.77 | 1.78 | 1.83 | 1.85 | 2.05 | 1.78 | 1.86 | 1.89 | -    | - | 1.82 | - | - | - | 12.85 |
| 98 | 3.18 | 2.53 | - | 3.73 | 3.22 | 3.39 | 3.62 | 3.31 | 3.77 | 1.78 | 1.83 | 1.85 | 2.05 | 1.78 | 1.86 | 1.89 | -    | - | 1.82 | - | - | - | 12.85 |

|     |      |      |   |      |      |      |      |      |      |      |      |      |      |      |      |      |   |   |      |   |   |   |       |
|-----|------|------|---|------|------|------|------|------|------|------|------|------|------|------|------|------|---|---|------|---|---|---|-------|
| 99  | 3.17 | 2.53 | - | 3.74 | 3.22 | 3.39 | 3.62 | 3.31 | 3.77 | 1.78 | 1.83 | 1.85 | 2.05 | 1.78 | 1.86 | 1.89 | - | - | 1.82 | - | - | - | 12.85 |
| 100 | 3.18 | 2.53 | - | 3.74 | 3.23 | 3.39 | 3.63 | 3.31 | 3.77 | 1.79 | 1.83 | 1.85 | 2.05 | 1.78 | 1.86 | 1.89 | - | - | 1.83 | - | - | - | 12.85 |
| 101 | 3.19 | 2.51 | - | 3.75 | 3.23 | 3.39 | 3.62 | 3.31 | 3.77 | 1.79 | 1.82 | 1.85 | 2.05 | 1.78 | 1.86 | 1.89 | - | - | 1.83 | - | - | - | 12.85 |
| 102 | 3.19 | 2.51 | - | 3.76 | 3.22 | 3.40 | 3.62 | 3.30 | 3.77 | 1.79 | 1.82 | 1.85 | 2.05 | 1.78 | 1.86 | 1.89 | - | - | 1.83 | - | - | - | 12.85 |
| 103 | 3.20 | 2.50 | - | 3.77 | 3.21 | 3.40 | 3.63 | 3.30 | 3.77 | 1.79 | 1.82 | 1.85 | 2.05 | 1.78 | 1.85 | 1.89 | - | - | 1.83 | - | - | - | 12.85 |
| 104 | 3.20 | 2.49 | - | 3.76 | 3.22 | 3.40 | 3.63 | 3.30 | 3.77 | 1.78 | 1.82 | 1.85 | 2.05 | 1.79 | 1.86 | 1.89 | - | - | 1.83 | - | - | - | 12.85 |
| 105 | 3.21 | 2.49 | - | 3.77 | 3.21 | 3.40 | 3.63 | 3.31 | 3.76 | 1.78 | 1.82 | 1.86 | 2.05 | 1.78 | 1.85 | 1.89 | - | - | 1.83 | - | - | - | 12.85 |
| 106 | 3.21 | 2.49 | - | 3.76 | 3.22 | 3.41 | 3.62 | 3.30 | 3.76 | 1.78 | 1.82 | 1.85 | 2.05 | 1.78 | 1.85 | 1.89 | - | - | 1.83 | - | - | - | 12.85 |
| 107 | 3.22 | 2.49 | - | 3.76 | 3.22 | 3.42 | 3.61 | 3.30 | 3.75 | 1.78 | 1.82 | 1.86 | 2.05 | 1.78 | 1.86 | 1.89 | - | - | 1.83 | - | - | - | 12.85 |
| 108 | 3.22 | 2.48 | - | 3.77 | 3.22 | 3.42 | 3.60 | 3.28 | 3.76 | 1.77 | 1.82 | 1.86 | 2.06 | 1.78 | 1.86 | 1.89 | - | - | 1.83 | - | - | - | 12.85 |
| 109 | 3.23 | 2.48 | - | 3.78 | 3.21 | 3.42 | 3.60 | 3.29 | 3.76 | 1.77 | 1.82 | 1.86 | 2.06 | 1.78 | 1.86 | 1.89 | - | - | 1.83 | - | - | - | 12.85 |
| 110 | 3.22 | 2.48 | - | 3.76 | 3.22 | 3.42 | 3.60 | 3.30 | 3.75 | 1.77 | 1.82 | 1.86 | 2.05 | 1.78 | 1.86 | 1.90 | - | - | 1.83 | - | - | - | 12.85 |
| 111 | 3.22 | 2.47 | - | 3.76 | 3.21 | 3.41 | 3.61 | 3.31 | 3.76 | 1.77 | 1.82 | 1.86 | 2.05 | 1.78 | 1.85 | 1.90 | - | - | 1.83 | - | - | - | 12.85 |
| 112 | 3.23 | 2.46 | - | 3.76 | 3.21 | 3.43 | 3.59 | 3.31 | 3.76 | 1.77 | 1.82 | 1.86 | 2.05 | 1.78 | 1.85 | 1.89 | - | - | 1.84 | - | - | - | 12.85 |
| 113 | 3.24 | 2.45 | - | 3.76 | 3.22 | 3.43 | 3.59 | 3.31 | 3.76 | 1.77 | 1.82 | 1.86 | 2.05 | 1.78 | 1.85 | 1.89 | - | - | 1.84 | - | - | - | 12.85 |
| 114 | 3.22 | 2.47 | - | 3.76 | 3.21 | 3.44 | 3.58 | 3.31 | 3.76 | 1.77 | 1.83 | 1.86 | 2.05 | 1.78 | 1.86 | 1.89 | - | - | 1.83 | - | - | - | 12.85 |
| 115 | 3.21 | 2.48 | - | 3.76 | 3.22 | 3.44 | 3.58 | 3.31 | 3.76 | 1.77 | 1.83 | 1.86 | 2.05 | 1.79 | 1.86 | 1.90 | - | - | 1.83 | - | - | - | 12.85 |
| 116 | 3.21 | 2.48 | - | 3.76 | 3.22 | 3.45 | 3.58 | 3.32 | 3.76 | 1.77 | 1.83 | 1.86 | 2.05 | 1.79 | 1.86 | 1.89 | - | - | 1.83 | - | - | - | 12.85 |
| 117 | 3.22 | 2.48 | - | 3.76 | 3.21 | 3.44 | 3.59 | 3.32 | 3.75 | 1.77 | 1.83 | 1.86 | 2.05 | 1.78 | 1.86 | 1.89 | - | - | 1.82 | - | - | - | 12.85 |
| 118 | 3.21 | 2.49 | - | 3.77 | 3.21 | 3.43 | 3.59 | 3.32 | 3.75 | 1.77 | 1.83 | 1.86 | 2.05 | 1.79 | 1.86 | 1.89 | - | - | 1.83 | - | - | - | 12.85 |
| 119 | 3.22 | 2.47 | - | 3.77 | 3.20 | 3.43 | 3.59 | 3.32 | 3.75 | 1.76 | 1.83 | 1.86 | 2.05 | 1.78 | 1.86 | 1.89 | - | - | 1.84 | - | - | - | 12.85 |
| 120 | 3.21 | 2.49 | - | 3.77 | 3.21 | 3.46 | 3.57 | 3.32 | 3.75 | 1.77 | 1.83 | 1.87 | 2.05 | 1.78 | 1.85 | 1.89 | - | - | 1.84 | - | - | - | 12.85 |
| 121 | 3.20 | 2.49 | - | 3.77 | 3.21 | 3.46 | 3.56 | 3.32 | 3.75 | 1.77 | 1.83 | 1.87 | 2.05 | 1.78 | 1.85 | 1.89 | - | - | 1.83 | - | - | - | 12.85 |
| 122 | 5.68 | -    | - | 3.76 | 3.21 | 3.47 | 3.55 | 3.33 | 3.74 | 1.77 | 1.83 | 1.86 | 2.06 | 1.78 | 1.85 | 1.89 | - | - | 1.84 | - | - | - | 12.85 |
| 123 | 5.68 | -    | - | 3.76 | 3.21 | 3.46 | 3.56 | 3.33 | 3.75 | 1.77 | 1.83 | 1.86 | 2.05 | 1.78 | 1.85 | 1.89 | - | - | 1.84 | - | - | - | 12.85 |
| 124 | 5.69 | -    | - | 3.76 | 3.20 | 3.45 | 3.58 | 3.33 | 3.75 | 1.77 | 1.83 | 1.87 | 2.05 | 1.78 | 1.86 | 1.88 | - | - | 1.83 | - | - | - | 12.86 |
| 125 | 5.68 | -    | - | 3.77 | 3.19 | 3.45 | 3.57 | 3.33 | 3.75 | 1.77 | 1.83 | 1.87 | 2.05 | 1.78 | 1.86 | 1.89 | - | - | 1.83 | - | - | - | 12.85 |
| 126 | 5.69 | -    | - | 3.77 | 3.20 | 3.47 | 3.56 | 3.34 | 3.74 | 1.77 | 1.83 | 1.87 | 2.06 | 1.78 | 1.86 | 1.89 | - | - | 1.84 | - | - | - | 12.85 |
| 127 | 5.67 | -    | - | 3.78 | 3.19 | 3.48 | 3.55 | 3.33 | 3.74 | 1.77 | 1.83 | 1.86 | 2.05 | 1.78 | 1.86 | 1.89 | - | - | 1.85 | - | - | - | 12.86 |
| 128 | 5.68 | -    | - | 3.79 | 3.19 | 3.48 | 3.56 | 3.34 | 3.74 | 1.78 | 1.83 | 1.86 | 2.06 | 1.78 | 1.86 | 1.89 | - | - | 1.84 | - | - | - | 12.85 |
| 129 | 5.67 | -    | - | 3.78 | 3.20 | 3.47 | 3.56 | 3.33 | 3.74 | 1.78 | 1.82 | 1.87 | 2.05 | 1.78 | 1.86 | 1.88 | - | - | 1.85 | - | - | - | 12.86 |
| 130 | 5.66 | -    | - | 3.78 | 3.20 | 3.44 | 3.58 | 3.33 | 3.75 | 1.78 | 1.83 | 1.86 | 2.05 | 1.78 | 1.86 | 1.89 | - | - | 1.85 | - | - | - | 12.86 |
| 131 | 5.67 | -    | - | 3.78 | 3.19 | 3.45 | 3.58 | 3.34 | 3.74 | 1.78 | 1.83 | 1.86 | 2.05 | 1.78 | 1.86 | 1.89 | - | - | 1.84 | - | - | - | 12.86 |
| 132 | 5.68 | -    | - | 3.78 | 3.19 | 3.46 | 3.57 | 3.34 | 3.74 | 1.78 | 1.83 | 1.86 | 2.05 | 1.78 | 1.86 | 1.89 | - | - | 1.83 | - | - | - | 12.86 |
| 133 | 5.68 | -    | - | 3.78 | 3.19 | 3.48 | 3.55 | 3.34 | 3.74 | 1.78 | 1.83 | 1.86 | 2.05 | 1.78 | 1.86 | 1.89 | - | - | 1.84 | - | - | - | 12.86 |

|     |      |   |   |      |      |      |      |      |      |      |      |      |      |      |      |      |   |   |      |   |   |   |       |
|-----|------|---|---|------|------|------|------|------|------|------|------|------|------|------|------|------|---|---|------|---|---|---|-------|
| 134 | 5.67 | - | - | 3.78 | 3.19 | 3.48 | 3.56 | 3.35 | 3.73 | 1.78 | 1.83 | 1.86 | 2.05 | 1.78 | 1.86 | 1.89 | - | - | 1.85 | - | - | - | 12.86 |
| 135 | 5.67 | - | - | 3.79 | 3.19 | 3.46 | 3.57 | 3.35 | 3.72 | 1.78 | 1.83 | 1.86 | 2.05 | 1.78 | 1.86 | 1.89 | - | - | 1.85 | - | - | - | 12.86 |
| 136 | 5.68 | - | - | 3.79 | 3.19 | 3.44 | 3.59 | 3.35 | 3.72 | 1.78 | 1.83 | 1.86 | 2.05 | 1.78 | 1.86 | 1.89 | - | - | 1.85 | - | - | - | 12.86 |
| 137 | 5.68 | - | - | 3.79 | 3.18 | 3.45 | 3.57 | 3.35 | 3.72 | 1.78 | 1.83 | 1.86 | 2.05 | 1.78 | 1.85 | 1.89 | - | - | 1.85 | - | - | - | 12.86 |
| 138 | 5.68 | - | - | 3.79 | 3.19 | 3.46 | 3.57 | 3.35 | 3.71 | 1.78 | 1.83 | 1.86 | 2.06 | 1.78 | 1.85 | 1.89 | - | - | 1.85 | - | - | - | 12.86 |
| 139 | 5.68 | - | - | 3.80 | 3.18 | 3.47 | 3.56 | 3.35 | 3.72 | 1.78 | 1.83 | 1.86 | 2.06 | 1.78 | 1.85 | 1.88 | - | - | 1.84 | - | - | - | 12.86 |
| 140 | 5.68 | - | - | 3.78 | 3.20 | 3.47 | 3.57 | 3.35 | 3.72 | 1.78 | 1.82 | 1.85 | 2.06 | 1.78 | 1.85 | 1.89 | - | - | 1.84 | - | - | - | 12.86 |
| 141 | 5.66 | - | - | 3.78 | 3.19 | 3.46 | 3.58 | 3.35 | 3.72 | 1.79 | 1.83 | 1.85 | 2.06 | 1.78 | 1.85 | 1.88 | - | - | 1.84 | - | - | - | 12.86 |
| 142 | 5.66 | - | - | 3.80 | 3.17 | 3.45 | 3.58 | 3.36 | 3.72 | 1.78 | 1.83 | 1.85 | 2.06 | 1.79 | 1.85 | 1.89 | - | - | 1.85 | - | - | - | 12.86 |
| 143 | 5.66 | - | - | 3.79 | 3.17 | 3.45 | 3.58 | 3.35 | 3.72 | 1.78 | 1.83 | 1.85 | 2.06 | 1.79 | 1.85 | 1.85 | - | - | 1.85 | - | - | - | 12.86 |
| 144 | 5.66 | - | - | 3.80 | 3.17 | 3.46 | 3.57 | 3.35 | 3.72 | 1.79 | 1.82 | 1.85 | 2.06 | 1.78 | 1.86 | 1.88 | - | - | 1.86 | - | - | - | 12.86 |
| 145 | 5.66 | - | - | 3.80 | 3.17 | 3.45 | 3.57 | 3.35 | 3.72 | 1.78 | 1.82 | 1.85 | 2.06 | 1.79 | 1.86 | 1.88 | - | - | 1.85 | - | - | - | 12.86 |
| 146 | 5.67 | - | - | 3.80 | 3.17 | 3.46 | 3.58 | 3.35 | 3.71 | 1.78 | 1.83 | 1.85 | 2.05 | 1.79 | 1.85 | 1.88 | - | - | 1.84 | - | - | - | 12.86 |
| 147 | 5.67 | - | - | 3.80 | 3.17 | 3.45 | 3.59 | 3.36 | 3.71 | 1.79 | 1.83 | 1.86 | 2.05 | 1.79 | 1.85 | 1.89 | - | - | 1.84 | - | - | - | 12.86 |
| 148 | 5.67 | - | - | 3.81 | 3.17 | 3.44 | 3.60 | 3.35 | 3.71 | 1.79 | 1.83 | 1.86 | 2.06 | 1.79 | 1.85 | 1.89 | - | - | 1.84 | - | - | - | 12.86 |
| 149 | 5.66 | - | - | 3.81 | 3.16 | 3.45 | 3.59 | 3.35 | 3.71 | 1.78 | 1.83 | 1.86 | 2.06 | 1.79 | 1.85 | 1.89 | - | - | 1.85 | - | - | - | 12.86 |
| 150 | 5.66 | - | - | 3.81 | 3.16 | 3.45 | 3.59 | 3.34 | 3.72 | 1.78 | 1.83 | 1.86 | 2.05 | 1.79 | 1.85 | 1.88 | - | - | 1.85 | - | - | - | 12.86 |
| 151 | 5.66 | - | - | 3.81 | 3.16 | 3.44 | 3.60 | 3.34 | 3.72 | 1.78 | 1.83 | 1.86 | 2.05 | 1.79 | 1.85 | 1.88 | - | - | 1.86 | - | - | - | 12.86 |
| 152 | 5.67 | - | - | 3.81 | 3.16 | 3.44 | 3.60 | 3.34 | 3.72 | 1.78 | 1.83 | 1.85 | 2.05 | 1.79 | 1.85 | 1.88 | - | - | 1.86 | - | - | - | 12.86 |
| 153 | 5.67 | - | - | 3.81 | 3.15 | 3.43 | 3.61 | 3.35 | 3.72 | 1.78 | 1.83 | 1.85 | 2.05 | 1.79 | 1.85 | 1.88 | - | - | 1.85 | - | - | - | 12.86 |
| 154 | 5.67 | - | - | 3.82 | 3.16 | 3.42 | 3.61 | 3.35 | 3.71 | 1.78 | 1.83 | 1.85 | 2.05 | 1.79 | 1.85 | 1.85 | - | - | 1.84 | - | - | - | 12.86 |
| 155 | 5.67 | - | - | 3.82 | 3.16 | 3.43 | 3.61 | 3.35 | 3.71 | 1.78 | 1.83 | 1.86 | 2.06 | 1.79 | 1.85 | 1.86 | - | - | 1.84 | - | - | - | 12.86 |
| 156 | 5.67 | - | - | 3.82 | 3.16 | 3.42 | 3.61 | 3.35 | 3.71 | 1.78 | 1.83 | 1.85 | 2.06 | 1.79 | 1.86 | 1.88 | - | - | 1.85 | - | - | - | 12.86 |
| 157 | 5.66 | - | - | 3.82 | 3.15 | 3.42 | 3.61 | 3.35 | 3.71 | 1.78 | 1.83 | 1.85 | 2.06 | 1.79 | 1.86 | 1.88 | - | - | 1.85 | - | - | - | 12.86 |
| 158 | 5.66 | - | - | 3.82 | 3.15 | 3.42 | 3.62 | 3.35 | 3.71 | 1.78 | 1.83 | 1.85 | 2.06 | 1.78 | 1.86 | 1.88 | - | - | 1.85 | - | - | - | 12.87 |
| 159 | 5.66 | - | - | 3.79 | 3.15 | 3.42 | 3.63 | 3.34 | 3.71 | 1.78 | 1.83 | 1.85 | 2.06 | 1.78 | 1.86 | 1.88 | - | - | 1.86 | - | - | - | 12.87 |
| 160 | 5.67 | - | - | 3.81 | 3.15 | 3.41 | 3.62 | 3.35 | 3.69 | 1.78 | 1.83 | 1.85 | 2.06 | 1.78 | 1.86 | 1.88 | - | - | 1.85 | - | - | - | 12.86 |
| 161 | 5.67 | - | - | 3.81 | 3.15 | 3.41 | 3.62 | 3.35 | 3.70 | 1.78 | 1.83 | 1.85 | 2.06 | 1.78 | 1.86 | 1.88 | - | - | 1.85 | - | - | - | 12.87 |
| 162 | 5.67 | - | - | 3.82 | 3.15 | 3.41 | 3.62 | 3.35 | 3.70 | 1.79 | 1.83 | 1.85 | 2.05 | 1.78 | 1.86 | 1.88 | - | - | 1.85 | - | - | - | 12.87 |
| 163 | 5.66 | - | - | 3.82 | 3.15 | 3.41 | 3.62 | 3.34 | 3.70 | 1.79 | 1.83 | 1.85 | 2.05 | 1.78 | 1.86 | 1.88 | - | - | 1.85 | - | - | - | 12.87 |
| 164 | 5.67 | - | - | 3.82 | 3.15 | 3.41 | 3.63 | 3.34 | 3.71 | 1.79 | 1.83 | 1.84 | 2.05 | 1.78 | 1.86 | 1.88 | - | - | 1.84 | - | - | - | 12.87 |
| 165 | 5.67 | - | - | 3.82 | 3.15 | 3.41 | 3.64 | 3.33 | 3.71 | 1.79 | 1.83 | 1.84 | 2.05 | 1.78 | 1.86 | 1.88 | - | - | 1.85 | - | - | - | 12.87 |
| 166 | 5.66 | - | - | 3.82 | 3.15 | 3.41 | 3.64 | 3.34 | 3.71 | 1.79 | 1.84 | 1.84 | 2.05 | 1.79 | 1.86 | 1.88 | - | - | 1.85 | - | - | - | 12.86 |
| 167 | 5.66 | - | - | 3.83 | 3.14 | 3.41 | 3.63 | 3.35 | 3.71 | 1.79 | 1.83 | 1.84 | 2.05 | 1.79 | 1.86 | 1.88 | - | - | 1.85 | - | - | - | 12.87 |
| 168 | 5.66 | - | - | 3.83 | 3.14 | 3.42 | 3.63 | 3.36 | 3.70 | 1.79 | 1.83 | 1.84 | 2.06 | 1.79 | 1.86 | 1.88 | - | - | 1.85 | - | - | - | 12.87 |

|     |      |   |   |      |      |      |      |      |      |      |      |      |      |      |      |      |   |   |      |   |   |   |       |
|-----|------|---|---|------|------|------|------|------|------|------|------|------|------|------|------|------|---|---|------|---|---|---|-------|
| 169 | 5.66 | - | - | 3.82 | 3.15 | 3.42 | 3.63 | 3.36 | 3.70 | 1.79 | 1.84 | 1.85 | 2.06 | 1.79 | 1.86 | 1.88 | - | - | 1.85 | - | - | - | 12.87 |
| 170 | 5.66 | - | - | 3.82 | 3.15 | 3.40 | 3.64 | 3.36 | 3.69 | 1.79 | 1.84 | 1.85 | 2.06 | 1.79 | 1.86 | 1.88 | - | - | 1.85 | - | - | - | 12.87 |
| 171 | 5.67 | - | - | 3.82 | 3.15 | 3.40 | 3.64 | 3.36 | 3.70 | 1.79 | 1.84 | 1.84 | 2.06 | 1.79 | 1.86 | 1.87 | - | - | 1.85 | - | - | - | 12.87 |
| 172 | 5.66 | - | - | 3.84 | 3.14 | 3.39 | 3.65 | 3.36 | 3.70 | 1.79 | 1.84 | 1.84 | 2.06 | 1.79 | 1.86 | 1.88 | - | - | 1.85 | - | - | - | 12.87 |
| 173 | 5.66 | - | - | 3.84 | 3.13 | 3.39 | 3.65 | 3.36 | 3.70 | 1.79 | 1.85 | 1.84 | 2.06 | 1.79 | 1.86 | 1.88 | - | - | 1.85 | - | - | - | 12.87 |
| 174 | 5.67 | - | - | 3.83 | 3.13 | 3.39 | 3.64 | 3.37 | 3.69 | 1.79 | 1.84 | 1.84 | 2.06 | 1.78 | 1.86 | 1.87 | - | - | 1.85 | - | - | - | 12.87 |
| 175 | 5.66 | - | - | 3.84 | 3.13 | 3.40 | 3.64 | 3.37 | 3.69 | 1.79 | 1.84 | 1.84 | 2.06 | 1.78 | 1.85 | 1.87 | - | - | 1.85 | - | - | - | 12.87 |
| 176 | 5.66 | - | - | 3.84 | 3.13 | 3.40 | 3.64 | 3.37 | 3.69 | 1.79 | 1.84 | 1.84 | 2.06 | 1.78 | 1.86 | 1.87 | - | - | 1.85 | - | - | - | 12.87 |
| 177 | 5.66 | - | - | 3.86 | 3.11 | 3.39 | 3.65 | 3.37 | 3.69 | 1.80 | 1.84 | 1.84 | 2.06 | 1.78 | 1.86 | 1.88 | - | - | 1.85 | - | - | - | 12.87 |
| 178 | 5.66 | - | - | 3.86 | 3.11 | 3.40 | 3.65 | 3.36 | 3.70 | 1.79 | 1.84 | 1.84 | 2.06 | 1.78 | 1.86 | 1.87 | - | - | 1.85 | - | - | - | 12.87 |
| 179 | 5.65 | - | - | 3.84 | 3.14 | 3.39 | 3.66 | 3.36 | 3.70 | 1.79 | 1.84 | 1.84 | 2.06 | 1.78 | 1.86 | 1.88 | - | - | 1.85 | - | - | - | 12.87 |
| 180 | 5.65 | - | - | 3.83 | 3.14 | 3.40 | 3.65 | 3.36 | 3.69 | 1.80 | 1.84 | 1.84 | 2.06 | 1.78 | 1.86 | 1.88 | - | - | 1.85 | - | - | - | 12.87 |
| 181 | 5.65 | - | - | 3.84 | 3.14 | 3.39 | 3.65 | 3.36 | 3.69 | 1.79 | 1.84 | 1.84 | 2.06 | 1.78 | 1.86 | 1.88 | - | - | 1.85 | - | - | - | 12.87 |
| 182 | 5.65 | - | - | 3.86 | 3.12 | 3.39 | 3.67 | 3.37 | 3.69 | 1.80 | 1.84 | 1.84 | 2.06 | 1.78 | 1.86 | 1.88 | - | - | 1.86 | - | - | - | 12.87 |
| 183 | 5.66 | - | - | 3.85 | 3.12 | 3.40 | 3.65 | 3.37 | 3.69 | 1.80 | 1.84 | 1.84 | 2.06 | 1.78 | 1.86 | 1.88 | - | - | 1.85 | - | - | - | 12.87 |
| 184 | 5.66 | - | - | 3.84 | 3.13 | 3.40 | 3.65 | 3.36 | 3.70 | 1.80 | 1.84 | 1.84 | 2.06 | 1.78 | 1.86 | 1.88 | - | - | 1.85 | - | - | - | 12.87 |
| 185 | 5.65 | - | - | 3.84 | 3.13 | 3.40 | 3.65 | 3.35 | 3.70 | 1.80 | 1.84 | 1.84 | 2.06 | 1.78 | 1.86 | 1.88 | - | - | 1.85 | - | - | - | 12.87 |
| 186 | 5.65 | - | - | 3.85 | 3.13 | 3.40 | 3.65 | 3.35 | 3.70 | 1.80 | 1.84 | 1.84 | 2.06 | 1.78 | 1.86 | 1.88 | - | - | 1.85 | - | - | - | 12.86 |
| 187 | 5.65 | - | - | 3.85 | 3.11 | 3.39 | 3.66 | 3.36 | 3.69 | 1.80 | 1.84 | 1.84 | 2.06 | 1.78 | 1.86 | 1.88 | - | - | 1.85 | - | - | - | 12.86 |
| 188 | 5.65 | - | - | 3.85 | 3.11 | 3.38 | 3.66 | 3.36 | 3.69 | 1.80 | 1.84 | 1.84 | 2.06 | 1.78 | 1.86 | 1.88 | - | - | 1.86 | - | - | - | 12.87 |
| 189 | 5.64 | - | - | 3.86 | 3.11 | 3.39 | 3.67 | 3.36 | 3.69 | 1.80 | 1.85 | 1.84 | 2.06 | 1.78 | 1.86 | 1.84 | - | - | 1.86 | - | - | - | 12.87 |
| 190 | 5.64 | - | - | 3.85 | 3.11 | 3.39 | 3.66 | 3.35 | 3.69 | 1.80 | 1.84 | 1.84 | 2.06 | 1.79 | 1.86 | 1.88 | - | - | 1.86 | - | - | - | 12.87 |
| 191 | 5.64 | - | - | 3.84 | 3.12 | 3.39 | 3.65 | 3.35 | 3.69 | 1.80 | 1.85 | 1.84 | 2.06 | 1.79 | 1.86 | 1.88 | - | - | 1.86 | - | - | - | 12.87 |
| 192 | 5.64 | - | - | 3.86 | 3.11 | 3.39 | 3.66 | 3.35 | 3.69 | 1.81 | 1.84 | 1.84 | 2.06 | 1.79 | 1.86 | 1.88 | - | - | 1.86 | - | - | - | 12.87 |
| 193 | 5.64 | - | - | 3.86 | 3.11 | 3.40 | 3.65 | 3.36 | 3.69 | 1.81 | 1.85 | 1.84 | 2.06 | 1.79 | 1.86 | 1.88 | - | - | 1.86 | - | - | - | 12.87 |
| 194 | 5.64 | - | - | 3.85 | 3.11 | 3.39 | 3.66 | 3.36 | 3.69 | 1.81 | 1.84 | 1.83 | 2.06 | 1.78 | 1.86 | 1.87 | - | - | 1.86 | - | - | - | 12.87 |
| 195 | 5.64 | - | - | 3.86 | 3.11 | 3.40 | 3.66 | 3.37 | 3.69 | 1.81 | 1.84 | 1.84 | 2.06 | 1.78 | 1.86 | 1.87 | - | - | 1.86 | - | - | - | 12.87 |
| 196 | 5.64 | - | - | 3.86 | 3.11 | 3.40 | 3.65 | 3.36 | 3.68 | 1.81 | 1.84 | 1.83 | 2.06 | 1.78 | 1.86 | 1.88 | - | - | 1.86 | - | - | - | 12.87 |
| 197 | 5.63 | - | - | 3.87 | 3.10 | 3.40 | 3.66 | 3.37 | 3.69 | 1.81 | 1.84 | 1.83 | 2.06 | 1.78 | 1.86 | 1.87 | - | - | 1.86 | - | - | - | 12.86 |
| 198 | 5.63 | - | - | 3.87 | 3.10 | 3.40 | 3.65 | 3.37 | 3.68 | 1.81 | 1.85 | 1.83 | 2.06 | 1.78 | 1.86 | 1.88 | - | - | 1.86 | - | - | - | 12.87 |
| 199 | 5.63 | - | - | 3.86 | 3.11 | 3.38 | 3.66 | 3.36 | 3.68 | 1.80 | 1.85 | 1.83 | 2.06 | 1.78 | 1.86 | 1.87 | - | - | 1.86 | - | - | - | 12.87 |
| 200 | 5.64 | - | - | 3.86 | 3.10 | 3.38 | 3.67 | 3.37 | 3.68 | 1.80 | 1.85 | 1.83 | 2.06 | 1.78 | 1.86 | 1.87 | - | - | 1.86 | - | - | - | 12.87 |
| 201 | 5.64 | - | - | 3.88 | 3.07 | 3.39 | 3.66 | 3.37 | 3.69 | 1.81 | 1.85 | 1.83 | 2.06 | 1.78 | 1.86 | 1.87 | - | - | 1.86 | - | - | - | 12.87 |
| 202 | 5.63 | - | - | 3.88 | 3.08 | 3.39 | 3.67 | 3.37 | 3.69 | 1.81 | 1.85 | 1.84 | 2.06 | 1.78 | 1.86 | 1.87 | - | - | 1.86 | - | - | - | 12.87 |
| 203 | 5.65 | - | - | 3.86 | 3.10 | 3.39 | 3.66 | 3.36 | 3.70 | 1.82 | 1.85 | 1.83 | 2.06 | 1.78 | 1.86 | 1.87 | - | - | 1.86 | - | - | - | 12.87 |

|     |      |   |   |      |      |      |      |      |      |      |      |      |      |      |      |      |   |   |      |   |   |   |       |
|-----|------|---|---|------|------|------|------|------|------|------|------|------|------|------|------|------|---|---|------|---|---|---|-------|
| 204 | 5.64 | - | - | 3.86 | 3.10 | 3.39 | 3.66 | 3.36 | 3.69 | 1.82 | 1.84 | 1.84 | 2.06 | 1.79 | 1.86 | 1.87 | - | - | 1.87 | - | - | - | 12.87 |
| 205 | 5.65 | - | - | 3.88 | 3.08 | 3.39 | 3.66 | 3.37 | 3.69 | 1.83 | 1.83 | 1.83 | 2.06 | 1.79 | 1.86 | 1.87 | - | - | 1.87 | - | - | - | 12.87 |
| 206 | 5.64 | - | - | 3.87 | 3.08 | 3.39 | 3.67 | 3.36 | 3.69 | 1.83 | 1.83 | 1.83 | 2.06 | 1.78 | 1.86 | 1.87 | - | - | 1.86 | - | - | - | 12.87 |
| 207 | 5.65 | - | - | 3.88 | 3.08 | 3.40 | 3.66 | 3.36 | 3.69 | 1.83 | 1.83 | 1.83 | 2.06 | 1.78 | 1.86 | 1.87 | - | - | 1.86 | - | - | - | 12.87 |
| 208 | 5.64 | - | - | 3.87 | 3.09 | 3.41 | 3.65 | 3.35 | 3.69 | 1.83 | 1.83 | 1.83 | 2.06 | 1.78 | 1.86 | 1.87 | - | - | 1.86 | - | - | - | 12.87 |
| 209 | 5.64 | - | - | 3.87 | 3.09 | 3.39 | 3.67 | 3.36 | 3.68 | 1.83 | 1.83 | 1.83 | 2.06 | 1.78 | 1.86 | 1.87 | - | - | 1.86 | - | - | - | 12.87 |
| 210 | 5.64 | - | - | 3.88 | 3.09 | 3.38 | 3.68 | 3.37 | 3.67 | 1.82 | 1.84 | 1.83 | 2.06 | 1.79 | 1.85 | 1.87 | - | - | 1.86 | - | - | - | 12.87 |
| 211 | 5.64 | - | - | 3.87 | 3.09 | 3.39 | 3.66 | 3.36 | 3.68 | 1.80 | 1.86 | 1.84 | 2.06 | 1.79 | 1.86 | 1.87 | - | - | 1.86 | - | - | - | 12.87 |
| 212 | 5.65 | - | - | 3.88 | 3.09 | 3.40 | 3.66 | 3.37 | 3.68 | 1.80 | 1.86 | 1.83 | 2.06 | 1.79 | 1.86 | 1.87 | - | - | 1.86 | - | - | - | 12.87 |
| 213 | 5.64 | - | - | 3.88 | 3.08 | 3.39 | 3.67 | 3.37 | 3.67 | 1.80 | 1.86 | 1.83 | 2.06 | 1.79 | 1.86 | 1.87 | - | - | 1.87 | - | - | - | 12.86 |
| 214 | 5.64 | - | - | 3.87 | 3.09 | 3.40 | 3.66 | 3.37 | 3.68 | 1.81 | 1.86 | 1.83 | 2.06 | 1.79 | 1.86 | 1.87 | - | - | 1.87 | - | - | - | 12.86 |

### *ELF analysis of ruthenium tetroxide*

The ELF analysis corresponding to the RuO<sub>4</sub> moiety considers a total of 40 electrons. From these 40 electrons, 8 electrons correspond to the valence core of ruthenium(VIII), being possible to identify such electrons with 4s<sup>2</sup>4p<sup>6</sup> electronic levels (not represented in Figure 4 of the main article). Now, it remains to locate 32 electrons.

According to the classical notation each oxygen atom should have 4 electrons and the double bond formed with ruthenium should also have 4 electrons (2 electrons for Ru and 2 electrons for each oxygen atom- In that way, it is possible to explain the observed valences: Ru shares  $2 \times 4$  electrons = 8 (corresponding to a valence of +8) and each oxygen shares 2 electrons (corresponding to a valence of -2). The total is  $(4 + 4) \times 4 = 32$  electrons.

On the other hand, the ELF analysis assigns 4 additional electrons to the valence layer of Ru since these 4 electrons are located in a monosynaptic basing (assigning to the metal a total of  $4 C(\text{Ru}) + 8 V(\text{Ru}) = 12$  electrons, in contrast to the classical view that assign 16 shared electrons through the corresponding bonds). The remaining 28 electrons are completely assigned to the oxygen atoms ( $4 \times 7 = 28$  electrons). In agreement with this electronic distribution, more in line with the real situation of a nude highly oxidized metal, there are not covalent bonds between ruthenium and oxygen atoms. The ELF analysis also is consistent with the high electronegativity of the oxygen atoms, by assigning to their monosynaptic basins an “extra” electron. Because of these reasons, the ELF analysis showed in the main article (Figure 4) shows no disynaptic basins corresponding to Ru–O covalent bonds.



## Cartesian coordinates

EP1

0 1

|    |               |               |               |
|----|---------------|---------------|---------------|
| C  | -2.8548691578 | 0.9395373692  | -0.7345813962 |
| H  | -3.5727649136 | 1.7153706797  | -1.0431066344 |
| H  | -1.9862766602 | 1.0102693433  | -1.4091605032 |
| C  | -2.3884046101 | 1.0997148307  | 0.7333415694  |
| H  | -1.4465844213 | 1.6666154491  | 0.7951372463  |
| O  | 0.4959158503  | 0.6066242852  | -1.3885746980 |
| O  | 3.0860209521  | 0.0512631778  | -0.6028537095 |
| O  | 1.2547238083  | 1.0475649190  | 1.1948008292  |
| O  | 1.0204515315  | -1.5304498055 | 0.2616038309  |
| Ru | 1.4698504173  | 0.0418624240  | -0.1368226860 |
| H  | -3.1311281428 | 1.6604900468  | 1.3219739655  |
| C  | -2.2325646554 | -0.3454163213 | 1.2901884385  |
| H  | -2.9861598836 | -0.5337430270 | 2.0715258172  |
| H  | -1.2486069695 | -0.5145375344 | 1.7546635168  |
| C  | -2.4792229021 | -1.2819931736 | 0.0907978509  |
| H  | -2.8766675374 | -2.2650709881 | 0.3883169209  |
| H  | -1.5341961441 | -1.4653852424 | -0.4486641088 |
| C  | -3.4304228705 | -0.4821736807 | -0.8078563801 |
| H  | -3.4941508214 | -0.8728978400 | -1.8359063843 |
| H  | -4.4501488697 | -0.5017719119 | -0.3831684852 |

EP2

0 1

|    |               |               |               |
|----|---------------|---------------|---------------|
| C  | -2.7154285606 | 1.1423535944  | -0.4359761192 |
| H  | -3.3829912771 | 2.0040248683  | -0.5841588830 |
| H  | -1.7424605856 | 1.3686405128  | -0.9173171697 |
| C  | -2.4977335166 | 0.7636661433  | 1.0440413850  |
| H  | -1.5351631077 | 1.1449668244  | 1.4140463438  |
| O  | 0.5781331321  | 1.1838244632  | -0.8580030352 |
| O  | 2.8861725146  | -0.2979780828 | -0.8354948423 |
| O  | 1.7494696658  | 0.5324282379  | 1.5425063022  |
| O  | 0.5387585792  | -1.4215290756 | 0.0345519699  |
| Ru | 1.4426023398  | -0.0001422490 | -0.0247979860 |
| H  | -3.2871372730 | 1.1857187760  | 1.6824901132  |
| C  | -2.5595367901 | -0.7852008884 | 1.0351160214  |
| H  | -3.4374747161 | -1.1434408936 | 1.5925571951  |
| H  | -1.6662572336 | -1.2507718654 | 1.4743574939  |
| C  | -2.6943401580 | -1.1237384390 | -0.4584372189 |
| H  | -3.3182254900 | -2.0054800105 | -0.6662292470 |
| H  | -1.6910845051 | -1.2968158756 | -0.9018677515 |
| O  | -3.3069550179 | 0.0087049596  | -1.0507955717 |

## EP3

0 1

|    |               |               |               |
|----|---------------|---------------|---------------|
| C  | -2.2516848787 | 0.4588740230  | -1.4643946460 |
| H  | -3.0092647143 | -0.0811273953 | -2.0538867608 |
| H  | -1.5750912695 | 0.9867117432  | -2.1486526839 |
| C  | -2.8795561914 | 1.3375645950  | -0.3848858923 |
| H  | -2.1384676086 | 2.0712815348  | -0.0315242698 |
| O  | 0.3429264692  | 0.7944646825  | -0.4995346799 |
| O  | 0.7670832437  | -1.3850210350 | 0.6109671576  |
| O  | 2.9947935781  | -0.1512398442 | -0.5420395347 |
| O  | 1.7228187979  | 0.8546436576  | 1.9465859645  |
| Ru | 1.6352077216  | 0.1047653435  | 0.4317210030  |
| H  | -3.7423294935 | 1.8909928187  | -0.7850840396 |
| C  | -3.2750540103 | 0.3971557739  | 0.7581265044  |
| H  | -4.1321915120 | -0.2256461314 | 0.4556070728  |
| H  | -3.5643330847 | 0.9445984302  | 1.6678214464  |
| C  | -2.0609334756 | -0.4877500490 | 1.0380426231  |
| H  | -2.2912988930 | -1.4472330003 | 1.5197158027  |
| H  | -1.3007403383 | 0.0320526327  | 1.6403107500  |
| S  | -1.2867553404 | -0.8423997800 | -0.5918608175 |

## EP4a

0 1

|    |               |               |               |
|----|---------------|---------------|---------------|
| C  | -2.3447082368 | -0.0376201459 | 1.1706634258  |
| H  | -2.8925364633 | 0.3497509538  | 2.0468039458  |
| H  | -1.2533104097 | -0.0271213139 | 1.4462769381  |
| C  | -2.7575394359 | -1.4398547177 | 0.7243714658  |
| H  | -2.2940692421 | -2.2284697925 | 1.3336398734  |
| O  | 0.6754960543  | -0.2581198888 | 1.4515247460  |
| O  | 3.0721912860  | 0.6559755542  | 0.4130233377  |
| O  | 1.6086529353  | -1.3989349861 | -0.8720139110 |
| O  | 0.6889358411  | 1.2377646397  | -0.8432366565 |
| Ru | 1.5479851896  | 0.0391059911  | 0.0163790550  |
| H  | -3.8517849697 | -1.5534294822 | 0.7935038756  |
| C  | -2.2995723998 | -1.4612838171 | -0.7433764103 |
| H  | -2.8413061547 | -2.1945458805 | -1.3571192887 |
| H  | -1.2272319670 | -1.7074966875 | -0.7979095186 |
| C  | -2.5244916142 | -0.0156774134 | -1.2175247781 |
| H  | -3.4759315224 | 0.0961966033  | -1.7713188502 |
| H  | -1.7188611169 | 0.3386638990  | -1.8835996283 |
| C  | -2.0670575623 | 2.1134720973  | -0.0096931238 |
| H  | -2.3095443745 | 2.6326623299  | 0.9298575229  |
| H  | -0.9484598904 | 2.1121731295  | -0.1311170080 |
| H  | -2.4854809868 | 2.6796471556  | -0.8561463281 |
| N  | -2.5620479600 | 0.7791877725  | 0.0080913156  |

## EP4b

0 1

|    |               |               |               |
|----|---------------|---------------|---------------|
| C  | 2.0671582944  | 2.1134576589  | -0.0098185745 |
| H  | 0.9485301137  | 2.1121783479  | -0.1309909257 |
| O  | -0.6889335846 | 1.2377943647  | -0.8430034106 |
| O  | -3.0722237582 | 0.6560075491  | 0.4132255157  |
| O  | -1.6087202949 | -1.3989351830 | -0.8716682356 |
| O  | -0.6755460564 | -0.2579425147 | 1.4518409939  |
| Ru | -1.5479814294 | 0.0391574065  | 0.0166458939  |
| H  | 2.4854223290  | 2.6795908664  | -0.8563774821 |
| H  | 2.3098539627  | 2.6326776933  | 0.9296625656  |
| C  | 2.3448206659  | -0.0376081950 | 1.1705342990  |
| C  | 2.2995368578  | -1.4613496477 | -0.7434428676 |
| C  | 2.7576094676  | -1.4398616172 | 0.7242702797  |
| H  | 1.2534417061  | -0.0270099914 | 1.4461700819  |
| H  | 2.8927091346  | 0.3497670123  | 2.0466341522  |
| H  | 1.2272073308  | -1.7076165917 | -0.7978767538 |
| H  | 2.8412586376  | -2.1946077905 | -1.3572011539 |
| H  | 2.2941895096  | -2.2284588269 | 1.3336002542  |
| H  | 3.8518604641  | -1.5534237907 | 0.7933326951  |
| N  | 2.5621254975  | 0.7791584130  | 0.0079231544  |
| C  | 2.5243550164  | -0.0157482281 | -1.2176663294 |
| H  | 1.7186001880  | 0.3385603576  | -1.8836068039 |
| H  | 3.4756919479  | 0.0961277071  | -1.7716343484 |

## EP5a

0 1

|    |               |               |               |
|----|---------------|---------------|---------------|
| C  | -2.3928290089 | 0.0122384812  | 1.2474041978  |
| H  | -3.0031279487 | 0.4290083897  | 2.0650141214  |
| H  | -1.3228581550 | 0.1646780614  | 1.5482646065  |
| C  | -2.6660669867 | -1.4603248306 | 0.9387277025  |
| H  | -2.1374712355 | -2.1360417614 | 1.6257762113  |
| O  | 0.6423012325  | 0.3867395770  | 1.5905210042  |
| O  | 2.9662299466  | 1.1886427837  | 0.3220760091  |
| O  | 1.6116777489  | -1.1847170665 | -0.4564884898 |
| O  | 0.5510074544  | 1.3315098624  | -0.9874034221 |
| Ru | 1.4821548021  | 0.4066888749  | 0.1037050089  |
| H  | -3.7451944795 | -1.6709283439 | 1.0180614494  |
| C  | -2.1956705874 | -1.5865790935 | -0.5181955319 |
| H  | -2.6436379633 | -2.4372977396 | -1.0507250071 |
| H  | -1.1013081418 | -1.7067762951 | -0.5496556728 |
| C  | -2.5834660363 | -0.2348463922 | -1.1350706189 |
| H  | -3.5676125319 | -0.2822450448 | -1.6394736409 |
| H  | -1.8521317728 | 0.1168316348  | -1.8815593480 |
| C  | -2.2239371142 | 2.0427388342  | -0.1845087531 |
| H  | -1.1086492361 | 2.0574036459  | -0.3495254040 |
| H  | -2.6635237285 | 2.4229495546  | -1.1214114185 |

|   |               |              |               |
|---|---------------|--------------|---------------|
| N | -2.6453523765 | 0.6865006408 | -0.0023936100 |
| C | -2.5746887664 | 2.9396006801 | 0.9763012184  |
| C | -1.6324435928 | 3.2654949627 | 1.9552661128  |
| C | -3.8847523750 | 3.4275878885 | 1.1250855851  |
| C | -1.9681582942 | 4.0588580288 | 3.0590987008  |
| H | -0.6131770989 | 2.8816799552 | 1.8658542160  |
| C | -4.2366844200 | 4.2161795687 | 2.2138965807  |
| H | -4.6397566126 | 3.1794580637 | 0.3743583983  |
| C | -3.2792445469 | 4.5390466247 | 3.1939464549  |
| H | -1.2054047578 | 4.2903219742 | 3.8017129262  |
| H | -5.2525505625 | 4.5986347083 | 2.3322540946  |
| O | -3.7117544216 | 5.3112000864 | 4.2202006831  |
| C | -2.8008845790 | 5.6623913430 | 5.2451795131  |
| H | -1.9527611517 | 6.2485295688 | 4.8518135852  |
| H | -3.3595601258 | 6.2766764808 | 5.9626541933  |
| H | -2.4086668962 | 4.7699980230 | 5.7624743537  |

#### EP5b

0 1

|    |               |               |               |
|----|---------------|---------------|---------------|
| C  | 0.6270841554  | 0.8053959173  | -1.1425633049 |
| H  | -0.0528848759 | -0.0874397634 | -1.0545202173 |
| O  | -1.1940807159 | -1.3359098182 | -0.0736168962 |
| O  | -3.6816511340 | -2.3430134144 | -0.7050905069 |
| O  | -3.3581551246 | -0.6636416791 | 1.5400812472  |
| O  | -3.1256077503 | 0.3675736314  | -1.0018269086 |
| Ru | -2.8701491487 | -1.0170040925 | -0.0386893079 |
| H  | 0.6000422391  | 1.1058318391  | -2.2044361589 |
| C  | -1.0579685375 | 2.5834051983  | -0.8417386936 |
| C  | -1.2102904005 | 2.4488440283  | 1.5369807525  |
| C  | -1.5414623500 | 3.3869627811  | 0.3653116995  |
| H  | -1.8411367380 | 1.8404134647  | -1.1470992660 |
| H  | -0.8251371425 | 3.1878681118  | -1.7348090450 |
| H  | -1.9999054591 | 1.6887546693  | 1.6491486712  |
| H  | -1.1120884118 | 2.9721897700  | 2.4984909713  |
| H  | -2.6093565418 | 3.6388607643  | 0.2999560729  |
| H  | -0.9737054041 | 4.3280910784  | 0.4486793709  |
| N  | 0.1043156784  | 1.8803190299  | -0.3597673808 |
| C  | 0.0987729277  | 1.7734813378  | 1.1004813861  |
| H  | 0.1585804254  | 0.7169267426  | 1.4100561967  |
| H  | 0.9841846538  | 2.2817144896  | 1.5238519679  |
| C  | 2.0226453968  | 0.3961593149  | -0.7358219868 |
| C  | 3.0478068058  | 1.3557370062  | -0.6524071197 |
| C  | 2.3327705664  | -0.9309732132 | -0.4290650566 |
| C  | 4.3382699515  | 0.9951969482  | -0.2858469677 |
| H  | 2.8194669687  | 2.4012032255  | -0.8745875906 |
| C  | 3.6291690635  | -1.3136066103 | -0.0613913307 |
| H  | 1.5446278909  | -1.6869841766 | -0.4676240644 |
| C  | 4.6425902723  | -0.3469515674 | 0.0117557742  |

|   |              |               |               |
|---|--------------|---------------|---------------|
| H | 5.1373328385 | 1.7366506078  | -0.2213011659 |
| H | 3.8308897581 | -2.3587113305 | 0.1709893830  |
| O | 5.9270713214 | -0.6054937452 | 0.3592834073  |
| C | 6.2979646694 | -1.9348166339 | 0.6729621443  |
| H | 7.3671869131 | -1.9112656932 | 0.9190998956  |
| H | 5.7362410876 | -2.3190596482 | 1.5417270708  |
| H | 6.1395271508 | -2.6134605699 | -0.1827740430 |

IN4a

0 1

|    |               |               |               |
|----|---------------|---------------|---------------|
| C  | -2.1194025864 | 0.1486492413  | 1.1350769510  |
| H  | -2.0558483131 | 0.7284925313  | 2.0581576760  |
| H  | 0.4045362359  | 1.4180209170  | 1.0251462975  |
| C  | -2.0809454713 | -1.3291716262 | 1.0235615131  |
| H  | -1.0529306878 | -1.6463776569 | 1.2703408040  |
| O  | 0.7496785708  | 0.6000981413  | 1.4607541716  |
| O  | 3.2121490481  | 0.0867500635  | -0.0963202298 |
| O  | 0.6558292561  | -1.5284847422 | -0.5888414454 |
| O  | 0.7542691613  | 1.2613566455  | -0.8732008941 |
| Ru | 1.5328919874  | -0.1584622639 | -0.0820230698 |
| H  | -2.7543850335 | -1.8064927977 | 1.7507639676  |
| C  | -2.4380987542 | -1.5813724117 | -0.4586094469 |
| H  | -3.4913522425 | -1.8819640819 | -0.5484673242 |
| H  | -1.8072965673 | -2.3588345511 | -0.9021727015 |
| C  | -2.2099238182 | -0.2241952025 | -1.1394946033 |
| H  | -2.9912456931 | 0.0669747935  | -1.8539866349 |
| H  | -1.2234247767 | -0.1300127414 | -1.6170428114 |
| C  | -2.1656476312 | 2.1652509284  | -0.2559079104 |
| H  | -2.2586257698 | 2.7102737712  | 0.6905820203  |
| H  | -1.1905110165 | 2.3718522015  | -0.7222910615 |
| H  | -2.9856327579 | 2.4382891868  | -0.9332304742 |
| N  | -2.2147631401 | 0.7319656543  | -0.0057297937 |

IN5a

0 1

|    |               |               |               |
|----|---------------|---------------|---------------|
| C  | -0.2947587291 | 1.7371696328  | 0.9255071433  |
| H  | 0.6023466897  | 1.2718946712  | 1.3352232399  |
| H  | -0.1229650220 | -0.9692213791 | 0.3870651558  |
| C  | -1.4889893222 | 2.1739649572  | 1.6899222287  |
| H  | -2.0022346382 | 1.2618302932  | 2.0386180304  |
| O  | -0.7922381777 | -1.0940281469 | 1.0979930606  |
| O  | -2.7440888297 | -2.9565827483 | -0.0723743382 |
| O  | -3.3431647560 | 0.0468495071  | 0.2110310914  |
| O  | -1.1990948450 | -0.9420230285 | -1.3263721506 |
| Ru | -2.3306748285 | -1.3128770308 | 0.0260467168  |
| H  | -1.2043891442 | 2.7496621973  | 2.5830960224  |

|   |               |               |               |
|---|---------------|---------------|---------------|
| C | -2.3116569067 | 2.9617510988  | 0.6458608218  |
| H | -2.1830744206 | 4.0424808651  | 0.7978418860  |
| H | -3.3794379000 | 2.7231972286  | 0.7015095749  |
| C | -1.7170103255 | 2.5374631864  | -0.7052978469 |
| H | -1.5502982889 | 3.3616367888  | -1.4116009545 |
| H | -2.2934226368 | 1.7424475957  | -1.1990543865 |
| C | 0.5391816220  | 1.5707423184  | -1.4031820710 |
| H | -0.0138270044 | 0.8509772809  | -2.0230310113 |
| H | 0.7196714902  | 2.4864120044  | -1.9862152770 |
| N | -0.4081634545 | 1.9492902579  | -0.3357831100 |
| C | 1.8174081954  | 0.9729140509  | -0.8901363724 |
| C | 2.0010525083  | -0.4153060775 | -0.8871156946 |
| C | 2.8476201635  | 1.7878855483  | -0.3876033741 |
| C | 3.1754639033  | -0.9913597408 | -0.3937488244 |
| H | 1.2000294645  | -1.0501341077 | -1.2741278128 |
| C | 4.0181345013  | 1.2294811465  | 0.1106499488  |
| H | 2.7292515179  | 2.8747376789  | -0.3860596598 |
| C | 4.1929102465  | -0.1678940542 | 0.1138913918  |
| H | 3.2845752732  | -2.0749745165 | -0.4104743408 |
| H | 4.8220240411  | 1.8557103660  | 0.5018731670  |
| O | 5.3626375921  | -0.6213109819 | 0.6158454020  |
| C | 5.6036687492  | -2.0176702697 | 0.6476401696  |
| H | 6.5983159543  | -2.1515778497 | 1.0908520756  |
| H | 4.8573620279  | -2.5426798055 | 1.2676100764  |
| H | 5.5977582901  | -2.4520749370 | -0.3663439784 |

## IN5b

0 1

|    |               |               |               |
|----|---------------|---------------|---------------|
| C  | 0.2950610000  | 3.1066510000  | -0.5666020000 |
| H  | -0.2065180000 | 2.6655810000  | -1.4389720000 |
| H  | 2.0152220000  | 0.0177680000  | -1.5551880000 |
| C  | 1.6577780000  | 3.7227080000  | -0.8868830000 |
| H  | 2.1498330000  | 3.1412410000  | -1.6825370000 |
| O  | 2.8415110000  | -0.2766780000 | -1.0905450000 |
| O  | 2.4898520000  | -3.1726340000 | -0.6535600000 |
| O  | 1.9334210000  | -1.1436380000 | 1.5898280000  |
| O  | 0.5640540000  | -1.0888480000 | -0.8482960000 |
| Ru | 2.0705880000  | -1.6462200000 | -0.0404200000 |
| H  | 1.5657450000  | 4.7622670000  | -1.2281930000 |
| C  | 2.4253830000  | 3.5714320000  | 0.4311680000  |
| H  | 2.0999860000  | 4.3344810000  | 1.1560970000  |
| H  | 3.5137110000  | 3.6552890000  | 0.3101590000  |
| C  | 2.0148860000  | 2.1770840000  | 0.8957500000  |
| H  | 2.0485850000  | 2.0214610000  | 1.9806760000  |
| H  | 2.6103740000  | 1.3995190000  | 0.3935560000  |
| C  | -0.1446210000 | 1.0531440000  | 0.7789500000  |
| H  | 0.3548560000  | 0.3370380000  | 1.4414740000  |
| N  | 0.6111430000  | 2.0474620000  | 0.4141740000  |

|   |               |               |               |
|---|---------------|---------------|---------------|
| C | -1.5156440000 | 0.7700980000  | 0.4545820000  |
| C | -1.9706110000 | -0.5186520000 | 0.8185310000  |
| C | -2.4345210000 | 1.6477790000  | -0.1748690000 |
| C | -3.2647360000 | -0.9393910000 | 0.5505770000  |
| H | -1.2751190000 | -1.2031510000 | 1.3054610000  |
| C | -3.7299820000 | 1.2416560000  | -0.4348830000 |
| H | -2.1521400000 | 2.6619840000  | -0.4435130000 |
| C | -4.1605740000 | -0.0575990000 | -0.0867560000 |
| H | -3.5722580000 | -1.9431820000 | 0.8384390000  |
| H | -4.4450620000 | 1.9140460000  | -0.9109210000 |
| O | -5.4293860000 | -0.3558980000 | -0.3895150000 |
| C | -5.9433000000 | -1.6513420000 | -0.1028790000 |
| H | -6.9789910000 | -1.6558090000 | -0.4624790000 |
| H | -5.3698430000 | -2.4317360000 | -0.6283950000 |
| H | -5.9316680000 | -1.8545650000 | 0.9794980000  |
| H | -0.3809030000 | 3.8393410000  | -0.0993000000 |

P1

0 1

|    |               |               |               |
|----|---------------|---------------|---------------|
| C  | -1.3969196912 | 0.4049751798  | 0.6534915913  |
| H  | -1.1016438207 | 0.6409964864  | 1.6903549203  |
| H  | 0.2049121863  | -0.8202311101 | 1.8233597971  |
| C  | -1.8958164556 | -1.0566432109 | 0.4692639309  |
| H  | -1.1925581439 | -1.5903613477 | -0.1877096995 |
| O  | 1.1141628176  | -0.9362887165 | 1.5006037077  |
| O  | 2.3831079611  | 1.3496680338  | 0.4287427171  |
| O  | 1.5823448079  | -1.0897883240 | -1.2921209798 |
| O  | -0.3084602302 | 0.7145888737  | -0.2264967839 |
| Ru | 1.4372233738  | 0.0515824224  | -0.0664862097 |
| H  | -1.9281643525 | -1.6029294024 | 1.4240681271  |
| C  | -2.5735063490 | 1.2917624925  | 0.2087515323  |
| H  | -3.2235000961 | 1.4680377017  | 1.0818450113  |
| H  | -2.2208925469 | 2.2676896762  | -0.1543944888 |
| C  | -3.2901982909 | -0.9535878069 | -0.1891339241 |
| H  | -4.0744351773 | -1.0116599050 | 0.5834427486  |
| H  | -3.4763484546 | -1.7666013370 | -0.9062544944 |
| C  | -3.3089405676 | 0.4405631470  | -0.8303114161 |
| H  | -4.3233707723 | 0.8054758589  | -1.0506241749 |
| H  | -2.7408851982 | 0.4336212880  | -1.7757479126 |

P2

0 1

|   |              |               |               |
|---|--------------|---------------|---------------|
| C | 1.4418408290 | 0.7310953384  | 0.6315797866  |
| H | 1.2099778568 | 1.2381655592  | 1.5819220229  |
| H | 0.1455281171 | -1.2305335396 | 1.2364345522  |
| C | 2.6887378000 | 1.2348999997  | -0.0878072077 |

|    |               |               |               |
|----|---------------|---------------|---------------|
| H  | 2.4816322406  | 2.1310672131  | -0.6863401099 |
| O  | -0.8384339330 | -1.2629094978 | 1.1298578020  |
| O  | -1.5275287382 | -0.8013983201 | -1.5671378956 |
| O  | -2.3087202969 | 1.1171247809  | 0.7171353986  |
| O  | 0.3479658734  | 0.8886448236  | -0.2556578349 |
| Ru | -1.3338853443 | 0.0359672342  | -0.1233858544 |
| H  | 3.4573350610  | 1.4786998733  | 0.6620317450  |
| C  | 3.0796571466  | 0.0029650259  | -0.9144349642 |
| H  | 4.1412003816  | -0.0083125028 | -1.1962374329 |
| H  | 2.4777276849  | -0.0394378623 | -1.8338779172 |
| C  | 2.7152316696  | -1.1536571350 | 0.0203542102  |
| H  | 3.5684413409  | -1.4814065166 | 0.6345356343  |
| H  | 2.2976708298  | -2.0260058201 | -0.5026420696 |
| O  | 1.7111404811  | -0.6229186540 | 0.9220081346  |

P3

0 1

|    |               |               |               |
|----|---------------|---------------|---------------|
| C  | 1.2929142870  | 0.4071838498  | 0.9658707882  |
| H  | 1.0755778028  | 0.3297237251  | 2.0431275128  |
| H  | -0.0823333893 | -1.8127229202 | 0.0675900031  |
| C  | 2.4327438810  | 1.3705998445  | 0.6264562113  |
| H  | 2.0847086344  | 2.4101783453  | 0.7135252844  |
| O  | -1.0647923075 | -1.7208414220 | 0.0302500493  |
| O  | -1.7564670557 | 0.3316193199  | -1.7443130663 |
| O  | -2.4541401846 | 0.4008630529  | 1.2641716297  |
| O  | 0.1553373567  | 0.8848678783  | 0.2849940702  |
| Ru | -1.5162486007 | 0.0907720022  | -0.0974070834 |
| H  | 3.2519989377  | 1.2165429316  | 1.3463970642  |
| C  | 2.8693461846  | 1.0130569134  | -0.7973776114 |
| H  | 3.7988061517  | 1.5276284608  | -1.0830062729 |
| H  | 2.0831798641  | 1.3243659293  | -1.5010360446 |
| C  | 3.0507562823  | -0.5107153810 | -0.8670936617 |
| H  | 4.0750349023  | -0.8184942540 | -0.6147923831 |
| H  | 2.7885389098  | -0.9273119305 | -1.8480012647 |
| S  | 1.9468783435  | -1.2381683453 | 0.4336737749  |

P4a

0 1

|   |               |               |               |
|---|---------------|---------------|---------------|
| C | -1.3351987545 | -0.2834670345 | 0.6806717843  |
| H | -0.8496706103 | -0.1268099879 | 1.6520519364  |
| H | 2.0176494565  | 1.0237921432  | 1.9299689499  |
| C | -2.2835118167 | -1.4786996757 | 0.6133700884  |
| H | -1.7415876443 | -2.4305898576 | 0.5299373330  |
| O | 1.1909708271  | 0.6690924390  | 1.5573150335  |
| O | 2.3043009820  | -1.5817939240 | 0.1336359507  |
| O | -0.2879287450 | -0.5327801943 | -0.3132243825 |



|    |               |               |               |
|----|---------------|---------------|---------------|
| O  | 1.8259883168  | 1.1492697121  | -1.1974727744 |
| Ru | 1.5222577874  | -0.1153840025 | -0.1288106629 |
| H  | -2.8823443410 | -1.5002337071 | 1.5372360219  |
| C  | -3.1506875830 | -1.1469966171 | -0.6144433980 |
| H  | -4.1572140279 | -1.5839126292 | -0.5535655838 |
| H  | -2.6712192051 | -1.5400989565 | -1.5226753920 |
| C  | -3.1735585117 | 0.3969518490  | -0.6576482066 |
| H  | -4.1582936260 | 0.8147644961  | -0.3791062932 |
| H  | -2.9440726488 | 0.7730279690  | -1.6738875747 |
| C  | -1.6092469104 | 2.1372439341  | 0.2118138481  |
| H  | -0.8690463054 | 2.2918577140  | 1.0098300218  |
| H  | -1.1060841331 | 2.3249711222  | -0.7589382350 |
| H  | -2.4061092317 | 2.8912377807  | 0.3247810568  |
| N  | -2.1621412748 | 0.8082454272  | 0.3148054783  |

P4b

0 1

|    |               |               |               |
|----|---------------|---------------|---------------|
| C  | -0.7903049471 | 1.7243997865  | 0.2334829726  |
| H  | 0.7925420965  | 0.7565369809  | 1.9750647123  |
| O  | 1.3040851056  | -0.0319388312 | 1.7270601085  |
| O  | 3.0275742004  | 0.3816391038  | -0.4914685095 |
| O  | 0.6442587123  | -1.5842052748 | -0.5667953861 |
| O  | 0.3018660217  | 1.2066234735  | -0.5822703678 |
| Ru | 1.4828706201  | -0.1878105291 | -0.1441523592 |
| H  | -0.4498909571 | 1.9534538222  | 1.2574244168  |
| H  | -1.0109840183 | 2.6820197838  | -0.2682141027 |
| C  | -2.6217521307 | 0.6201964147  | -1.0030237693 |
| C  | -2.7312456013 | -1.3220498933 | 0.3847747392  |
| C  | -3.5567357518 | -0.5357885942 | -0.6424089575 |
| H  | -1.9133203078 | 0.3116702916  | -1.7934722127 |
| H  | -3.1582712789 | 1.5132170122  | -1.3669021064 |
| H  | -1.9578532038 | -1.9130566606 | -0.1313930195 |
| H  | -3.3321766627 | -2.0048051160 | 1.0029110102  |
| H  | -3.8479433939 | -1.1317652706 | -1.5194444155 |
| H  | -4.4770552238 | -0.1483919203 | -0.1746514725 |
| N  | -1.9270520359 | 0.9059867473  | 0.2583109109  |
| C  | -2.0578924241 | -0.2153380859 | 1.2028524063  |
| H  | -1.0842545704 | -0.5319205119 | 1.6055971524  |
| H  | -2.6866762490 | 0.0799412712  | 2.0642142493  |

P5a

0 1

|   |               |               |              |
|---|---------------|---------------|--------------|
| C | -1.5797092712 | 0.8416708508  | 0.5200222107 |
| H | -0.6498156000 | 0.6709700236  | 1.0719153599 |
| H | 0.8188176331  | -1.9930469437 | 1.3785296706 |
| C | -2.8290344091 | 0.9732987491  | 1.3867928091 |

|    |               |               |               |
|----|---------------|---------------|---------------|
| H  | -3.1816894762 | -0.0024355650 | 1.7487781779  |
| O  | 0.1963261684  | -1.2980931644 | 1.1007537134  |
| O  | -2.0575695068 | -2.9699987823 | 0.4641773221  |
| O  | -1.7735746878 | -0.2823179774 | -0.3963542077 |
| O  | 0.0158700774  | -2.1080941423 | -1.6454437106 |
| Ru | -0.9338167697 | -1.9493438542 | -0.2618786040 |
| H  | -2.5874442173 | 1.5991106657  | 2.2602613479  |
| C  | -3.8181408196 | 1.6799565346  | 0.4428308350  |
| H  | -4.5662338990 | 2.2795687525  | 0.9799799758  |
| H  | -4.3578372423 | 0.9311859859  | -0.1550421084 |
| C  | -2.9196811983 | 2.5361731975  | -0.4762392736 |
| H  | -2.9889465066 | 3.6161355578  | -0.2520736609 |
| H  | -3.1991962551 | 2.4118445691  | -1.5400213016 |
| C  | -0.5404247507 | 2.3008876172  | -1.2129551612 |
| H  | -0.7678998544 | 1.7783081179  | -2.1641404782 |
| H  | -0.5502511078 | 3.3818594762  | -1.4386789877 |
| N  | -1.5628091419 | 2.0584421675  | -0.2104355957 |
| C  | 0.8248946239  | 1.8818035297  | -0.7248925485 |
| C  | 1.4987949708  | 0.8041956017  | -1.3003357827 |
| C  | 1.4133457713  | 2.5150390793  | 0.3845182323  |
| C  | 2.7238719186  | 0.3492452435  | -0.7980586871 |
| H  | 1.0489976119  | 0.2774274712  | -2.1441184148 |
| C  | 2.6284581757  | 2.0787372824  | 0.8985318702  |
| H  | 0.8958821102  | 3.3518030429  | 0.8610685978  |
| C  | 3.2941948829  | 0.9847665961  | 0.3128053590  |
| H  | 3.2083434788  | -0.5047193866 | -1.2700458759 |
| H  | 3.0867750091  | 2.5646896402  | 1.7624646921  |
| O  | 4.4675490726  | 0.6188771772  | 0.8880273311  |
| C  | 5.1644212765  | -0.4954263362 | 0.3641897479  |
| H  | 6.0646115587  | -0.6201702301 | 0.9795238402  |
| H  | 4.5582192523  | -1.4162366296 | 0.4202814556  |
| H  | 5.4649181216  | -0.3313659175 | -0.6850921497 |

P5b

0 1

|    |               |               |               |
|----|---------------|---------------|---------------|
| C  | -0.3930268188 | 0.8900087092  | -1.1190101955 |
| H  | 0.4518634859  | -0.5671546088 | 0.9788654301  |
| O  | -0.1666791556 | -1.2354533384 | 1.3354934847  |
| O  | -0.8594437202 | -3.1557654468 | -0.6204705465 |
| O  | -2.9259950162 | -1.2279721809 | 0.6819406726  |
| O  | -1.0530616274 | -0.4136993883 | -1.2513060850 |
| Ru | -1.4459293475 | -1.7205313835 | 0.0417103098  |
| H  | -0.3651656649 | 1.1767814818  | -2.1866117004 |
| C  | -2.4169096439 | 2.2786738057  | -1.1230717552 |
| C  | -2.8315101855 | 2.2026623269  | 1.2208855757  |
| C  | -3.1845584938 | 3.0176853611  | -0.0287436104 |
| H  | -2.9998389947 | 1.4102992306  | -1.4810396774 |
| H  | -2.1878297481 | 2.9109147757  | -1.9971167898 |

|   |               |               |               |
|---|---------------|---------------|---------------|
| H | -3.4113611469 | 1.2663387651  | 1.2325523546  |
| H | -3.0187722811 | 2.7368780291  | 2.1637047284  |
| H | -4.2641464833 | 3.0674021956  | -0.2313575573 |
| H | -2.8081894588 | 4.0494984061  | 0.0692459647  |
| N | -1.1793802167 | 1.8517587057  | -0.4532016314 |
| C | -1.3480063433 | 1.8794692077  | 1.0128033140  |
| H | -1.0620696684 | 0.9292614045  | 1.4837182768  |
| H | -0.7119636237 | 2.6639188098  | 1.4607598338  |
| C | 1.0383503982  | 0.7725900600  | -0.6310418442 |
| C | 1.6768977850  | 1.8605158926  | -0.0082734000 |
| C | 1.8006652253  | -0.3724051593 | -0.9043799971 |
| C | 3.0134195284  | 1.7886449862  | 0.3633294192  |
| H | 1.1150792781  | 2.7767681525  | 0.1725819498  |
| C | 3.1447647870  | -0.4612168974 | -0.5309287122 |
| H | 1.3406735331  | -1.2189041798 | -1.4167913466 |
| C | 3.7616690073  | 0.6238384673  | 0.1117322933  |
| H | 3.5081480866  | 2.6307257715  | 0.8508761704  |
| H | 3.6974258533  | -1.3733301226 | -0.7517493465 |
| O | 5.0518383194  | 0.6423886924  | 0.5117413562  |
| C | 5.8629990110  | -0.4957051251 | 0.2758003459  |
| H | 6.8570613801  | -0.2569645431 | 0.6739609723  |
| H | 5.4696339610  | -1.3865168573 | 0.7940872433  |
| H | 5.9480129992  | -0.7151380062 | -0.8019165000 |

R1

0 1

|   |               |               |               |
|---|---------------|---------------|---------------|
| C | -0.3629795481 | -1.2340437674 | 0.1401796861  |
| C | -1.3058569073 | -0.0066618853 | 0.0028131921  |
| C | -0.3761087743 | 1.2290497395  | -0.1440478476 |
| C | 1.0232548421  | 0.7295863233  | 0.2535607641  |
| C | 1.0320348203  | -0.7178399373 | -0.2525104009 |
| H | -0.3422036280 | -1.5764063147 | 1.1880864817  |
| H | -0.6875805273 | -2.0914268852 | -0.4694107345 |
| H | -1.9595731322 | 0.0849029212  | 0.8840479526  |
| H | -1.9694904145 | -0.1039404630 | -0.8703309514 |
| H | -0.3574427223 | 1.5623531879  | -1.1949832082 |
| H | -0.7102499783 | 2.0882693496  | 0.4577830832  |
| H | 1.8367069845  | 1.3463328219  | -0.1603226633 |
| H | 1.1314585734  | 0.7365267563  | 1.3527890346  |
| H | 1.1441031626  | -0.7229746938 | -1.3513142568 |
| H | 1.8510732496  | -1.3255241531 | 0.1637248686  |

R2

0 1

|   |               |               |               |
|---|---------------|---------------|---------------|
| C | 1.1641059149  | -0.4602037158 | -0.0005522056 |
| O | -0.0029443415 | -1.2437479572 | -0.2580808713 |

|   |               |               |               |
|---|---------------|---------------|---------------|
| C | -1.1589730074 | -0.4052706575 | -0.3109665731 |
| C | -0.7227740745 | 0.9544525530  | 0.2379471575  |
| C | 0.7470192921  | 0.9989539190  | -0.1938380506 |
| H | 1.5118548677  | -0.6375591780 | 1.0358568000  |
| H | 1.9699919618  | -0.7744281210 | -0.6845249624 |
| H | -1.5073239257 | -0.3150083898 | -1.3583570522 |
| H | -1.9701321764 | -0.8687202676 | 0.2749015339  |
| H | -1.3248154551 | 1.7863656594  | -0.1555045907 |
| H | -0.7983007147 | 0.9674815750  | 1.3377263353  |
| H | 0.8245718713  | 1.2837210942  | -1.2560428940 |
| H | 1.3594467875  | 1.6989604863  | 0.3928993733  |

### R3

#### 0 1

|   |               |               |               |
|---|---------------|---------------|---------------|
| C | 0.0468870683  | 1.3438838382  | 0.1371085708  |
| C | 0.0496369336  | -1.3437229925 | -0.1361061093 |
| C | -1.2831365873 | -0.7150590474 | 0.2758596896  |
| C | -1.2842722655 | 0.7126242643  | -0.2761022190 |
| H | 0.0150148119  | 1.6998733762  | 1.1780489533  |
| H | 0.3411409622  | 2.1836309211  | -0.5080136886 |
| H | 0.0194171574  | -1.6997911376 | -1.1770693000 |
| H | 0.3449200765  | -2.1828895279 | 0.5093011257  |
| H | -2.1318999043 | -1.3081153292 | -0.1003837741 |
| H | -1.3573287119 | -0.6872393407 | 1.3758992075  |
| H | -1.3573849383 | 0.6846623654  | -1.3762106651 |
| H | -2.1345431981 | 1.3040226627  | 0.0993469089  |
| S | 1.3160095954  | 0.0013099474  | 0.0010753003  |

### R4

#### 0 1

|   |               |               |               |
|---|---------------|---------------|---------------|
| C | -0.0216161839 | -1.1539964696 | 0.1604103191  |
| C | -1.4956172502 | -0.7771325973 | -0.0632003234 |
| C | -1.4956154622 | 0.7771266576  | -0.0632223585 |
| C | -0.0216135539 | 1.1539934649  | 0.1603774154  |
| N | 0.7133554702  | -0.0000094776 | -0.3402404062 |
| H | 0.2830618251  | -2.0750851826 | -0.3626786071 |
| H | -1.8505916225 | -1.1634666465 | -1.0301547968 |
| H | -2.1433582820 | 1.2017673489  | 0.7174744003  |
| H | 0.1736424186  | 1.3135931528  | 1.2475339365  |
| H | 0.2830665753  | 2.0750665633  | -0.3627377769 |
| H | -1.8505891308 | 1.1634341022  | -1.0301877257 |
| H | -2.1433612093 | -1.2017496455 | 0.7175083470  |
| H | 0.1736394028  | -1.3135656206 | 1.2475713824  |
| C | 2.1240079699  | -0.0000066806 | -0.0338313584 |
| H | 2.3284927634  | 0.0000087552  | 1.0629790125  |
| H | 2.6088131380  | -0.8910705779 | -0.4638715107 |

|   |              |              |               |
|---|--------------|--------------|---------------|
| H | 2.6088151313 | 0.8910438532 | -0.4638969495 |
|---|--------------|--------------|---------------|

R5

0 1

|   |               |               |               |
|---|---------------|---------------|---------------|
| C | -2.4481941966 | 1.2077852129  | 0.3123852035  |
| C | -3.6110336750 | 1.3398638249  | -0.6874054055 |
| C | -3.7201185463 | -0.0674223426 | -1.3383662260 |
| C | -2.6018212148 | -0.8835063695 | -0.6672136852 |
| N | -2.4248030106 | -0.2163910823 | 0.6149129143  |
| H | -2.5847005910 | 1.8013614632  | 1.2314668899  |
| H | -4.5438922655 | 1.5955184211  | -0.1634583091 |
| H | -3.5998733345 | -0.0400372500 | -2.4312306624 |
| H | -1.6805523616 | -0.8451185931 | -1.2896870402 |
| H | -2.8541601553 | -1.9472162611 | -0.5242123325 |
| H | -4.7026918755 | -0.5143635722 | -1.1263023323 |
| H | -3.4198653442 | 2.1336515716  | -1.4242382693 |
| H | -1.5016159805 | 1.5497513490  | -0.1614661762 |
| C | -1.3522212099 | -0.6978513050 | 1.4770043971  |
| H | -1.4289925935 | -0.1588286542 | 2.4360638968  |
| H | -1.5465560299 | -1.7630885463 | 1.6867077045  |
| C | 0.0545525341  | -0.5438150973 | 0.9270892371  |
| C | 0.7970628512  | 0.6219214392  | 1.1494631718  |
| C | 0.6348132467  | -1.5427341836 | 0.1252231073  |
| C | 2.0703060798  | 0.8053696388  | 0.5974324762  |
| H | 0.3783010848  | 1.4127581543  | 1.7780967336  |
| C | 1.8992730456  | -1.3812095973 | -0.4333884963 |
| H | 0.0859945623  | -2.4705837778 | -0.0583090167 |
| C | 2.6288953789  | -0.2013169983 | -0.2045425773 |
| H | 2.6134369336  | 1.7276773062  | 0.8013792641  |
| H | 2.3496272104  | -2.1603629477 | -1.0519929149 |
| O | 3.8522990614  | -0.1276724136 | -0.7875418371 |
| C | 4.6342975917  | 1.0348838920  | -0.5910708082 |
| H | 5.5684652932  | 0.8816216062  | -1.1464331193 |
| H | 4.1284999183  | 1.9361218127  | -0.9786597344 |
| H | 4.8710215927  | 1.1911323000  | 0.4756479468  |

RuO4

0 1

|    |   |               |               |               |
|----|---|---------------|---------------|---------------|
| Ru | 0 | 0.            | 0.            | 0.            |
| O  | 0 | 0.9708090000  | 0.9708090000  | 0.9708090000  |
| O  | 0 | -0.9708090000 | -0.9708090000 | 0.9708090000  |
| O  | 0 | 0.9708090000  | -0.9708090000 | -0.9708090000 |
| O  | 0 | -0.9708090000 | 0.9708090000  | -0.9708090000 |

TS1

0 1

|    |               |               |               |
|----|---------------|---------------|---------------|
| C  | 1.8540451420  | 0.0515212257  | 1.0642158987  |
| H  | 1.8741079935  | 0.0848461217  | 2.1664831688  |
| H  | 0.5269761185  | 0.1559617674  | 1.1893001408  |
| C  | 2.4371856101  | 1.2558879824  | 0.3410895374  |
| H  | 1.6537149610  | 1.7922875897  | -0.2182677263 |
| O  | -0.6634615708 | 0.3028163888  | 1.4894025448  |
| O  | -2.3094319232 | -1.4979017988 | 0.0287582078  |
| O  | -2.2147205056 | 1.3558021339  | -0.6830639251 |
| O  | 0.0231848236  | -0.2642465932 | -0.8196844647 |
| Ru | -1.4908683866 | -0.0238604683 | -0.0339818958 |
| H  | 2.8664618939  | 1.9819727550  | 1.0493925232  |
| C  | 2.4127219399  | -1.2151063462 | 0.4509586145  |
| H  | 3.2290438601  | -1.5700390173 | 1.1099510143  |
| H  | 1.6825288510  | -2.0364885444 | 0.3930514996  |
| C  | 3.4836391015  | 0.6551054393  | -0.6270112138 |
| H  | 4.4632330120  | 0.6108993976  | -0.1219249611 |
| H  | 3.6098149192  | 1.2583776193  | -1.5381928200 |
| C  | 2.9831463908  | -0.7716914166 | -0.9045538703 |
| H  | 3.7760772882  | -1.4406758398 | -1.2714732544 |
| H  | 2.1786464808  | -0.7531623963 | -1.6543400185 |

TS2

0 1

|    |               |               |               |
|----|---------------|---------------|---------------|
| C  | -1.9802765095 | 0.1842408097  | 1.1026546534  |
| H  | -1.9768261391 | 0.3924505681  | 2.1847072289  |
| H  | -0.6437338954 | 0.2176603174  | 1.1169738660  |
| C  | -2.4435011306 | -1.1520517210 | 0.5814125323  |
| H  | -1.6701226267 | -1.9282818988 | 0.6507049780  |
| O  | 0.5374108474  | 0.1682168234  | 1.4792185418  |
| O  | 2.2970951560  | 1.3979937034  | -0.4013188006 |
| O  | 2.0919123243  | -1.5469034970 | -0.1766138602 |
| O  | -0.0755791983 | 0.0202817445  | -0.9311792111 |
| Ru | 1.4210965341  | -0.0031404208 | -0.0489355520 |
| H  | -3.2958674105 | -1.4787096705 | 1.2033615845  |
| C  | -2.8719663482 | -0.8255951208 | -0.8629592523 |
| H  | -3.8329756618 | -1.2936701392 | -1.1141275682 |
| H  | -2.1151463904 | -1.1739135421 | -1.5748749746 |
| C  | -2.9623971590 | 0.7106529021  | -0.8953444763 |
| H  | -3.9793681050 | 1.1016227374  | -1.0392163665 |
| H  | -2.2900087949 | 1.1621666743  | -1.6376961085 |
| O  | -2.5332924924 | 1.1786637301  | 0.4089847852  |

TS3

0 1

|   |              |              |              |
|---|--------------|--------------|--------------|
| C | 1.8317725867 | 0.0040782524 | 1.1702659687 |
|---|--------------|--------------|--------------|

|    |               |               |               |
|----|---------------|---------------|---------------|
| H  | 1.9316042406  | -0.1991214733 | 2.2459304791  |
| H  | 0.5085497234  | -0.1703133892 | 1.1823804499  |
| C  | 2.1835634136  | 1.4015031040  | 0.6652483546  |
| H  | 1.2677228729  | 1.9998025566  | 0.5614182608  |
| O  | -0.6766150438 | -0.3971789964 | 1.3953290678  |
| O  | -2.2042494349 | -1.5333292849 | -0.7013076437 |
| O  | -2.7139672045 | 1.2035526169  | 0.2732744334  |
| O  | -0.3634183880 | 0.5070642579  | -1.0309476744 |
| Ru | -1.6570375913 | -0.0785130192 | -0.0396099103 |
| H  | 2.8151928054  | 1.9093884423  | 1.4110222458  |
| C  | 2.9247909302  | 1.2493836578  | -0.6832109769 |
| H  | 4.0105640879  | 1.3151679427  | -0.5140995240 |
| H  | 2.6485698169  | 2.0445923668  | -1.3912891749 |
| C  | 2.5890553360  | -0.1230421570 | -1.2696483781 |
| H  | 3.3306473782  | -0.5080710601 | -1.9817998107 |
| H  | 1.5826367250  | -0.1360550572 | -1.7158139714 |
| S  | 2.5142597455  | -1.2470677599 | 0.1741368046  |

TS4a

0 1

|    |               |               |               |
|----|---------------|---------------|---------------|
| C  | -2.1019617472 | 0.0263618716  | 1.1462261895  |
| H  | -2.2681781424 | 0.4851861560  | 2.1339149427  |
| H  | -0.8670092292 | -0.1247819829 | 1.1518780032  |
| C  | -2.6480776634 | -1.3644100784 | 0.8590329606  |
| H  | -2.0773884808 | -2.1511012511 | 1.3704090158  |
| O  | 0.4141863975  | -0.6663062796 | 1.1508235668  |
| O  | 2.9548144923  | 0.4923259143  | 0.7503180106  |
| O  | 1.6858802749  | -1.2102380186 | -1.2733997050 |
| O  | 0.7396083739  | 1.3337987275  | -0.6499197085 |
| Ru | 1.5605738415  | -0.0668776742 | -0.0339266834 |
| H  | -3.6989463958 | -1.4339166331 | 1.1880193470  |
| C  | -2.5278892221 | -1.4259093058 | -0.6743482953 |
| H  | -3.2326725858 | -2.1276747867 | -1.1395527861 |
| H  | -1.5076609830 | -1.7329113886 | -0.9515008693 |
| C  | -2.7636727439 | 0.0262523668  | -1.1199218135 |
| H  | -3.8088902711 | 0.2145425808  | -1.4249684665 |
| H  | -2.1142866036 | 0.3353686643  | -1.9552581313 |
| C  | -2.0370173143 | 2.1754026125  | -0.0371676385 |
| H  | -2.1854263597 | 2.7097823328  | 0.9126078445  |
| H  | -0.9367360798 | 2.1643854625  | -0.2674297830 |
| H  | -2.5739728399 | 2.6894823336  | -0.8457532737 |
| N  | -2.4631647180 | 0.8201313765  | 0.0721382734  |

TS4b

0 1

|   |              |              |               |
|---|--------------|--------------|---------------|
| C | 1.4895306531 | 2.0355275378 | -0.0467659434 |
|---|--------------|--------------|---------------|

|    |               |               |               |
|----|---------------|---------------|---------------|
| H  | 0.3489881440  | 1.6482050859  | -0.3562207907 |
| O  | -0.7223068728 | 1.0435570793  | -1.0224961635 |
| O  | -3.1317378406 | 0.3849126370  | 0.2560751785  |
| O  | -1.2318287511 | -1.6986505465 | -0.5879234824 |
| O  | -0.6338449773 | 0.0908440463  | 1.4407810653  |
| Ru | -1.5421607282 | -0.1337792433 | -0.0188441256 |
| H  | 1.6934723617  | 2.7042500706  | -0.8962945977 |
| H  | 1.3925721343  | 2.5653600366  | 0.9086421132  |
| C  | 2.3876610568  | 0.1293184154  | 1.2148746153  |
| C  | 2.5657690744  | -1.2893745631 | -0.7107185028 |
| C  | 3.0077426367  | -1.1946041789 | 0.7577286000  |
| H  | 1.3424933970  | 0.0003451459  | 1.5781585111  |
| H  | 2.9516234014  | 0.6468892391  | 2.0083750913  |
| H  | 1.5188720209  | -1.6286329382 | -0.7713851792 |
| H  | 3.1870577488  | -1.9667241542 | -1.3127929887 |
| H  | 2.6656014732  | -2.0419095684 | 1.3678350878  |
| H  | 4.1066256462  | -1.1501464633 | 0.8262477819  |
| N  | 2.3175734864  | 0.9391510754  | 0.0110290517  |
| C  | 2.6576696176  | 0.1652826668  | -1.1834146631 |
| H  | 1.9711247049  | 0.4139269240  | -2.0052156517 |
| H  | 3.6846296127  | 0.4151176958  | -1.5089300072 |

TS5a

0 1

|    |               |               |               |
|----|---------------|---------------|---------------|
| C  | -0.3449335128 | 1.8691494209  | 0.9620502137  |
| H  | 0.6287364085  | 1.6552071733  | 1.4283450866  |
| H  | -0.8398485387 | 0.7380048622  | 0.9914684687  |
| C  | -1.3207565975 | 2.7924544744  | 1.6742062590  |
| H  | -1.8000068523 | 2.3081204418  | 2.5358651809  |
| O  | -1.4130730498 | -0.5029157402 | 1.2903639251  |
| O  | -1.4382713789 | -2.9318590977 | -0.1432932398 |
| O  | -3.8537019414 | -1.3114460836 | 0.2070486855  |
| O  | -1.7173283515 | -0.5129121957 | -1.4079191698 |
| Ru | -2.1778712987 | -1.4154866773 | 0.0036476704  |
| H  | -0.7922246833 | 3.6896087974  | 2.0395648032  |
| C  | -2.3027992572 | 3.1366685048  | 0.5425697613  |
| H  | -2.8323454155 | 4.0867581106  | 0.6930904253  |
| H  | -3.0536987205 | 2.3361713157  | 0.4531515714  |
| C  | -1.4181321854 | 3.1466966718  | -0.7138508239 |
| H  | -1.0598932855 | 4.1591052328  | -0.9737740442 |
| H  | -1.9226403341 | 2.7340924524  | -1.6026154209 |
| C  | 0.4046498261  | 1.5574725364  | -1.3691641085 |
| H  | -0.3105707842 | 0.7416140267  | -1.6647268053 |
| H  | 0.5530235630  | 2.2088868542  | -2.2453435493 |
| N  | -0.2728184406 | 2.3105342591  | -0.3515899366 |
| C  | 1.6941763485  | 0.9360161682  | -0.8972681959 |
| C  | 1.8147618906  | -0.4503090481 | -0.7693757226 |
| C  | 2.7925739771  | 1.7366719116  | -0.5355916899 |



|   |              |               |               |
|---|--------------|---------------|---------------|
| C | 2.9903431965 | -1.0420407275 | -0.2929770314 |
| H | 0.9748232163 | -1.0897748808 | -1.0464024950 |
| C | 3.9658127127 | 1.1666342634  | -0.0571276079 |
| H | 2.7198886156 | 2.8239587342  | -0.6232853463 |
| C | 4.0749125443 | -0.2315038068 | 0.0720107188  |
| H | 3.0436841140 | -2.1267404276 | -0.2082989952 |
| H | 4.8208777230 | 1.7833668454  | 0.2266493700  |
| O | 5.2522442272 | -0.6979755875 | 0.5515395575  |
| C | 5.4182537110 | -2.0940385568 | 0.7202909848  |
| H | 6.4289152199 | -2.2422852964 | 1.1211781588  |
| H | 4.6830164250 | -2.5063461265 | 1.4324635101  |
| H | 5.3274589087 | -2.6325678047 | -0.2385471685 |

### TS5b

0 1

|    |               |               |               |
|----|---------------|---------------|---------------|
| C  | 0.4307089275  | 0.8160181637  | -0.9744375892 |
| H  | -0.2352216954 | -0.0916874853 | -0.5201564886 |
| O  | -0.8541812167 | -1.0734126701 | 0.3617059835  |
| O  | -2.8869449830 | -2.8008636922 | -0.4631905145 |
| O  | -3.4153439761 | -0.6319539142 | 1.4342506862  |
| O  | -2.7756613268 | -0.1247912327 | -1.2098814592 |
| Ru | -2.5677499025 | -1.2358076204 | 0.0995301332  |
| H  | 0.2475227183  | 0.7376549871  | -2.0577472591 |
| C  | -1.2804500269 | 2.5595904931  | -1.1014209184 |
| C  | -1.5098398078 | 2.7711177630  | 1.2696575735  |
| C  | -1.8975710168 | 3.4726637540  | -0.0397292769 |
| H  | -1.9623801916 | 1.7131756101  | -1.3516109228 |
| H  | -1.0189699578 | 3.0683473100  | -2.0434208557 |
| H  | -2.1748802217 | 1.9117566812  | 1.4526727614  |
| H  | -1.5486814345 | 3.4298510095  | 2.1484542580  |
| H  | -2.9831973381 | 3.5819524648  | -0.1697036490 |
| H  | -1.4472494570 | 4.4775755309  | -0.0853728142 |
| N  | -0.1013272837 | 1.9961444496  | -0.4641897676 |
| C  | -0.0896381188 | 2.2735622354  | 0.9776078746  |
| H  | 0.1921468395  | 1.3673498076  | 1.5333575019  |
| H  | 0.6555180854  | 3.0537939096  | 1.2126014366  |
| C  | 1.8355359849  | 0.4626515266  | -0.5883350219 |
| C  | 2.7835797304  | 1.4498343906  | -0.2612768708 |
| C  | 2.2438502348  | -0.8787203678 | -0.5766486691 |
| C  | 4.0897855628  | 1.1050030241  | 0.0634045450  |
| H  | 2.4940511588  | 2.5019069242  | -0.2809957837 |
| C  | 3.5527349626  | -1.2403565314 | -0.2549318532 |
| H  | 1.5195716619  | -1.6617500514 | -0.8119470559 |
| C  | 4.4885496271  | -0.2446561783 | 0.0728073187  |
| H  | 4.8302073941  | 1.8685946983  | 0.3094294888  |
| H  | 3.8296355985  | -2.2938243603 | -0.2550767425 |
| O  | 5.7763124360  | -0.4871554285 | 0.4044153082  |
| C  | 6.2409827193  | -1.8255193273 | 0.4313285253  |

|   |              |               |               |
|---|--------------|---------------|---------------|
| H | 7.2981845430 | -1.7823036895 | 0.7215217453  |
| H | 5.6878337418 | -2.4310724790 | 1.1692083876  |
| H | 6.1570930283 | -2.3029017049 | -0.5597280155 |
